# Supplementary material for: Whole-genome de novo sequencing reveals unique genes that contributed to the adaptive evolution of the Mikado pheasant
Source: PubMed Central journal article supplement (PMC5941149; doi:10.1093/gigascience/giy044), 2018-05-02

## Whole-Genome De Novo Sequencing Reveals Unique Genes that Contributed to the Adaptive Evolution of the Mikado Pheasant --Manuscript Draft--

|                                                      |                                                                                                                                                                                                                                                                                                                                                                                                                                                                                                                                                                                                                                                                                                                                                                                                                                                                                                                                                                                                                                                                                                                                                                                                                                                                                                                                                                                                                                                                                                                                                                                                                                                                                                                                                                                                 |                    |
|------------------------------------------------------|-------------------------------------------------------------------------------------------------------------------------------------------------------------------------------------------------------------------------------------------------------------------------------------------------------------------------------------------------------------------------------------------------------------------------------------------------------------------------------------------------------------------------------------------------------------------------------------------------------------------------------------------------------------------------------------------------------------------------------------------------------------------------------------------------------------------------------------------------------------------------------------------------------------------------------------------------------------------------------------------------------------------------------------------------------------------------------------------------------------------------------------------------------------------------------------------------------------------------------------------------------------------------------------------------------------------------------------------------------------------------------------------------------------------------------------------------------------------------------------------------------------------------------------------------------------------------------------------------------------------------------------------------------------------------------------------------------------------------------------------------------------------------------------------------|--------------------|
| <b>Manuscript Number:</b>                            | GIGA-D-17-00220R1                                                                                                                                                                                                                                                                                                                                                                                                                                                                                                                                                                                                                                                                                                                                                                                                                                                                                                                                                                                                                                                                                                                                                                                                                                                                                                                                                                                                                                                                                                                                                                                                                                                                                                                                                                               |                    |
| <b>Full Title:</b>                                   | Whole-Genome De Novo Sequencing Reveals Unique Genes that Contributed to the Adaptive Evolution of the Mikado Pheasant                                                                                                                                                                                                                                                                                                                                                                                                                                                                                                                                                                                                                                                                                                                                                                                                                                                                                                                                                                                                                                                                                                                                                                                                                                                                                                                                                                                                                                                                                                                                                                                                                                                                          |                    |
| <b>Article Type:</b>                                 | Research                                                                                                                                                                                                                                                                                                                                                                                                                                                                                                                                                                                                                                                                                                                                                                                                                                                                                                                                                                                                                                                                                                                                                                                                                                                                                                                                                                                                                                                                                                                                                                                                                                                                                                                                                                                        |                    |
| <b>Funding Information:</b>                          | Taipei Zoo<br>(No. 13, 2015 Animal Adoption Programs<br>of Taipei Zoo)                                                                                                                                                                                                                                                                                                                                                                                                                                                                                                                                                                                                                                                                                                                                                                                                                                                                                                                                                                                                                                                                                                                                                                                                                                                                                                                                                                                                                                                                                                                                                                                                                                                                                                                          | Dr. Eric Y. Chuang |
| <b>Abstract:</b>                                     | <p><b>Background:</b> The Mikado pheasant (<i>Syrmaticus mikado</i>) is a nearly endangered species indigenous to high-altitude regions of Taiwan. This pheasant provides an opportunity to investigate evolutionary processes following geographic isolation. Currently, the genetic background and adaptive evolution of the Mikado pheasant remain unclear.</p> <p><b>Results:</b> We present the draft genome of the Mikado pheasant, which consists of 1.04 Gb of DNA and 15 972 annotated protein-coding genes. The Mikado pheasant displays expansion and positive selection of genes related to features that contribute to its adaptive evolution, such as energy metabolism, oxygen transport, hemoglobin binding, radiation response, immune response, and DNA repair. To investigate the molecular evolution of the major histocompatibility complex (MHC) across several avian species, 39 putative genes spanning 227 kb on a contiguous region were annotated and manually curated. The MHC loci of the pheasant revealed a high level of synteny, several rapidly evolving genes, and inverse regions compared to the same loci in the chicken. The complete mitochondrial genome was also sequenced, assembled, and compared against 4 other long-tailed pheasants. The results from molecular clock analysis suggest that ancestors of the Mikado pheasant migrated from the north to Taiwan about 3.47 million years ago.</p> <p><b>Conclusions:</b> This study provides a valuable genomic resource for the Mikado pheasant, insights into its adaptation to high altitude, and the evolutionary history of the genus <i>Syrmaticus</i>, which could potentially be useful for future studies investigating molecular evolution, genomics, ecology, and immunogenetics.</p> |                    |
| <b>Corresponding Author:</b>                         | Eric Y. Chuang<br><br>TAIWAN                                                                                                                                                                                                                                                                                                                                                                                                                                                                                                                                                                                                                                                                                                                                                                                                                                                                                                                                                                                                                                                                                                                                                                                                                                                                                                                                                                                                                                                                                                                                                                                                                                                                                                                                                                    |                    |
| <b>Corresponding Author Secondary Information:</b>   |                                                                                                                                                                                                                                                                                                                                                                                                                                                                                                                                                                                                                                                                                                                                                                                                                                                                                                                                                                                                                                                                                                                                                                                                                                                                                                                                                                                                                                                                                                                                                                                                                                                                                                                                                                                                 |                    |
| <b>Corresponding Author's Institution:</b>           |                                                                                                                                                                                                                                                                                                                                                                                                                                                                                                                                                                                                                                                                                                                                                                                                                                                                                                                                                                                                                                                                                                                                                                                                                                                                                                                                                                                                                                                                                                                                                                                                                                                                                                                                                                                                 |                    |
| <b>Corresponding Author's Secondary Institution:</b> |                                                                                                                                                                                                                                                                                                                                                                                                                                                                                                                                                                                                                                                                                                                                                                                                                                                                                                                                                                                                                                                                                                                                                                                                                                                                                                                                                                                                                                                                                                                                                                                                                                                                                                                                                                                                 |                    |
| <b>First Author:</b>                                 | Chien-Yueh Lee                                                                                                                                                                                                                                                                                                                                                                                                                                                                                                                                                                                                                                                                                                                                                                                                                                                                                                                                                                                                                                                                                                                                                                                                                                                                                                                                                                                                                                                                                                                                                                                                                                                                                                                                                                                  |                    |
| <b>First Author Secondary Information:</b>           |                                                                                                                                                                                                                                                                                                                                                                                                                                                                                                                                                                                                                                                                                                                                                                                                                                                                                                                                                                                                                                                                                                                                                                                                                                                                                                                                                                                                                                                                                                                                                                                                                                                                                                                                                                                                 |                    |
| <b>Order of Authors:</b>                             | Chien-Yueh Lee                                                                                                                                                                                                                                                                                                                                                                                                                                                                                                                                                                                                                                                                                                                                                                                                                                                                                                                                                                                                                                                                                                                                                                                                                                                                                                                                                                                                                                                                                                                                                                                                                                                                                                                                                                                  |                    |
|                                                      | Ping-Han Hsieh                                                                                                                                                                                                                                                                                                                                                                                                                                                                                                                                                                                                                                                                                                                                                                                                                                                                                                                                                                                                                                                                                                                                                                                                                                                                                                                                                                                                                                                                                                                                                                                                                                                                                                                                                                                  |                    |
|                                                      | Li-Mei Chiang                                                                                                                                                                                                                                                                                                                                                                                                                                                                                                                                                                                                                                                                                                                                                                                                                                                                                                                                                                                                                                                                                                                                                                                                                                                                                                                                                                                                                                                                                                                                                                                                                                                                                                                                                                                   |                    |
|                                                      | Amrita Chattopadhyay                                                                                                                                                                                                                                                                                                                                                                                                                                                                                                                                                                                                                                                                                                                                                                                                                                                                                                                                                                                                                                                                                                                                                                                                                                                                                                                                                                                                                                                                                                                                                                                                                                                                                                                                                                            |                    |
|                                                      | Kuan-Yi Li                                                                                                                                                                                                                                                                                                                                                                                                                                                                                                                                                                                                                                                                                                                                                                                                                                                                                                                                                                                                                                                                                                                                                                                                                                                                                                                                                                                                                                                                                                                                                                                                                                                                                                                                                                                      |                    |
|                                                      | Yi-Fang Lee                                                                                                                                                                                                                                                                                                                                                                                                                                                                                                                                                                                                                                                                                                                                                                                                                                                                                                                                                                                                                                                                                                                                                                                                                                                                                                                                                                                                                                                                                                                                                                                                                                                                                                                                                                                     |                    |
|                                                      | Tzu-Pin Lu                                                                                                                                                                                                                                                                                                                                                                                                                                                                                                                                                                                                                                                                                                                                                                                                                                                                                                                                                                                                                                                                                                                                                                                                                                                                                                                                                                                                                                                                                                                                                                                                                                                                                                                                                                                      |                    |

|                                                |                                                                                                                                                                                                                                                                                                                                                                                                                                                                                                                                                                                                                                                                                                                                                                                                                                                                                                                                                                                                                                                                                                                                                                                                                                                                                                                                                                                                                                                                                                                                                                                                                                                                                                                                                                                                                                                                                                                                                                                                                                                                                                                                                                                                                                                                                                                                                                                                                                                                                                                                                                                                                                                                                                                                                                                                                                                                                                                                                                                                                                                                                                                                                                                                                                                                             |
|------------------------------------------------|-----------------------------------------------------------------------------------------------------------------------------------------------------------------------------------------------------------------------------------------------------------------------------------------------------------------------------------------------------------------------------------------------------------------------------------------------------------------------------------------------------------------------------------------------------------------------------------------------------------------------------------------------------------------------------------------------------------------------------------------------------------------------------------------------------------------------------------------------------------------------------------------------------------------------------------------------------------------------------------------------------------------------------------------------------------------------------------------------------------------------------------------------------------------------------------------------------------------------------------------------------------------------------------------------------------------------------------------------------------------------------------------------------------------------------------------------------------------------------------------------------------------------------------------------------------------------------------------------------------------------------------------------------------------------------------------------------------------------------------------------------------------------------------------------------------------------------------------------------------------------------------------------------------------------------------------------------------------------------------------------------------------------------------------------------------------------------------------------------------------------------------------------------------------------------------------------------------------------------------------------------------------------------------------------------------------------------------------------------------------------------------------------------------------------------------------------------------------------------------------------------------------------------------------------------------------------------------------------------------------------------------------------------------------------------------------------------------------------------------------------------------------------------------------------------------------------------------------------------------------------------------------------------------------------------------------------------------------------------------------------------------------------------------------------------------------------------------------------------------------------------------------------------------------------------------------------------------------------------------------------------------------------------|
|                                                | Liang-Chuan Lai                                                                                                                                                                                                                                                                                                                                                                                                                                                                                                                                                                                                                                                                                                                                                                                                                                                                                                                                                                                                                                                                                                                                                                                                                                                                                                                                                                                                                                                                                                                                                                                                                                                                                                                                                                                                                                                                                                                                                                                                                                                                                                                                                                                                                                                                                                                                                                                                                                                                                                                                                                                                                                                                                                                                                                                                                                                                                                                                                                                                                                                                                                                                                                                                                                                             |
|                                                | En-Chung Lin                                                                                                                                                                                                                                                                                                                                                                                                                                                                                                                                                                                                                                                                                                                                                                                                                                                                                                                                                                                                                                                                                                                                                                                                                                                                                                                                                                                                                                                                                                                                                                                                                                                                                                                                                                                                                                                                                                                                                                                                                                                                                                                                                                                                                                                                                                                                                                                                                                                                                                                                                                                                                                                                                                                                                                                                                                                                                                                                                                                                                                                                                                                                                                                                                                                                |
|                                                | Hsinyu Lee                                                                                                                                                                                                                                                                                                                                                                                                                                                                                                                                                                                                                                                                                                                                                                                                                                                                                                                                                                                                                                                                                                                                                                                                                                                                                                                                                                                                                                                                                                                                                                                                                                                                                                                                                                                                                                                                                                                                                                                                                                                                                                                                                                                                                                                                                                                                                                                                                                                                                                                                                                                                                                                                                                                                                                                                                                                                                                                                                                                                                                                                                                                                                                                                                                                                  |
|                                                | Shih-Torng Ding                                                                                                                                                                                                                                                                                                                                                                                                                                                                                                                                                                                                                                                                                                                                                                                                                                                                                                                                                                                                                                                                                                                                                                                                                                                                                                                                                                                                                                                                                                                                                                                                                                                                                                                                                                                                                                                                                                                                                                                                                                                                                                                                                                                                                                                                                                                                                                                                                                                                                                                                                                                                                                                                                                                                                                                                                                                                                                                                                                                                                                                                                                                                                                                                                                                             |
|                                                | Mong-Hsun Tsai                                                                                                                                                                                                                                                                                                                                                                                                                                                                                                                                                                                                                                                                                                                                                                                                                                                                                                                                                                                                                                                                                                                                                                                                                                                                                                                                                                                                                                                                                                                                                                                                                                                                                                                                                                                                                                                                                                                                                                                                                                                                                                                                                                                                                                                                                                                                                                                                                                                                                                                                                                                                                                                                                                                                                                                                                                                                                                                                                                                                                                                                                                                                                                                                                                                              |
|                                                | Chien-Yu Chen                                                                                                                                                                                                                                                                                                                                                                                                                                                                                                                                                                                                                                                                                                                                                                                                                                                                                                                                                                                                                                                                                                                                                                                                                                                                                                                                                                                                                                                                                                                                                                                                                                                                                                                                                                                                                                                                                                                                                                                                                                                                                                                                                                                                                                                                                                                                                                                                                                                                                                                                                                                                                                                                                                                                                                                                                                                                                                                                                                                                                                                                                                                                                                                                                                                               |
|                                                | Eric Y. Chuang                                                                                                                                                                                                                                                                                                                                                                                                                                                                                                                                                                                                                                                                                                                                                                                                                                                                                                                                                                                                                                                                                                                                                                                                                                                                                                                                                                                                                                                                                                                                                                                                                                                                                                                                                                                                                                                                                                                                                                                                                                                                                                                                                                                                                                                                                                                                                                                                                                                                                                                                                                                                                                                                                                                                                                                                                                                                                                                                                                                                                                                                                                                                                                                                                                                              |
| <b>Order of Authors Secondary Information:</b> |                                                                                                                                                                                                                                                                                                                                                                                                                                                                                                                                                                                                                                                                                                                                                                                                                                                                                                                                                                                                                                                                                                                                                                                                                                                                                                                                                                                                                                                                                                                                                                                                                                                                                                                                                                                                                                                                                                                                                                                                                                                                                                                                                                                                                                                                                                                                                                                                                                                                                                                                                                                                                                                                                                                                                                                                                                                                                                                                                                                                                                                                                                                                                                                                                                                                             |
| <b>Response to Reviewers:</b>                  | <p>Editor suggestions:</p> <p>Please check for potential contamination, along the lines suggested by reviewer 2, and describe this step in the manuscript. Among other points, reviewer 1 also remarks that only mitochondrial data has been used for divergence time estimates - this should be discussed as a potential limitation in the revised manuscript.</p> <p>Reviewer 3 has an important point regarding errors in the gal4 assembly - please carefully address this point, as it may affect your conclusions.</p> <p>Response: Thank you for returning the constructive and useful comments from the three reviewers. Following the suggestion from Reviewer #2, contamination testing for sequencing reads was performed, and 31 contaminated scaffolds were identified and removed from the draft genome. Please refer to response 2-11 for the details. On Reviewer #1's suggestion, since nuclear genome data of the copper pheasant is not available now, we could only incorporate the five long-tailed pheasants into our analysis on the mitochondrial level. Discussion about the potential impact of this on the divergence time estimate has been added to the revised manuscript. Please refer to response 1-2 for the details. On Reviewer #3's point, instead of the chr16 sequence from the gal4 or gal5 genome references, we used the chicken MHC-B sequence in our manuscript. The sequence was obtained from GenBank (AB268588.1) and it was produced by Sanger sequencing technology. We apologize for only mentioning it in the legend of Figure 3, but not clearly noting it in the manuscript. The sentence has been rephrased in the revised manuscript to clarify this point. Also, a result identical to that of our previous analysis was obtained after we realigned the MHC region between the Mikado pheasant and chr16 of gal5 (NC_006103.4). Please refer to response 3-2 for the details. All these points are fully addressed, and they do not affect our conclusions.</p> <p>Overall, the reviewers point out quite a large number of minor inaccuracies or places where further information is needed - please make an effort to address all of these points, as it will help to make your work more clear and more reproducible.</p> <p>Response: We are grateful for the editor's and reviewers' helpful suggestions on our manuscript. All points have been fully addressed as described below.</p> <p>Another minor issue: In the first paragraph of the abstract, you write "... adaptive behaviors of the Mikado pheasant .." - do you actually mean animal behaviour here? Or rather something like "patterns of adaptive evolution"?</p> <p>Response: We apologize for the confusion and we have replaced all instances of "behavior" with "evolution" in the revised manuscript.</p> <p>Please also clarify in the manuscript whether you had approval of an ethics committee and /or , if applicable, permission of wildlife authorities (if the bird was caught in the wild for this study?) for the animal research.</p> <p>Response: We thank you for your reminding us of this requirement. We have added a statement on ethics approval and consent in the Declarations section.</p> <p>Reviewer reports:</p> |

Reviewer #1: The manuscript entitled "Whole-Genome De Nova Sequencing Reveals Unique Genes that Contributed to the Adaptive Evolution of the Mikado Pheasant" utilizes the nuclear and mitochondrial genomes to identify genes related to adaptation and immunity. Furthermore, they use nuclear genome genes to reconstruct the phylogenetic position of the Mikado Pheasant among birds with sequenced genomes and estimate the divergence time using mitochondrial genomes of long-tailed pheasants. The manuscript is in very good shape and I have mostly minor comments (see below). Generally, I thought the Results section could be better presented, but the Discussion section was very well written and really brings the significance of these findings to light.

Response: We appreciate the favorable comments and have addressed each issue as described below.

#### Major comments

1-1: One critical issue I had with the results was the use of separate analyses for the identification of PSGs - 5 vs. 50 species. Can you remove one of these analyses? Or if you decide to retain both, I think a couple of statements about how many PSGs and GO terms overlap and an explanation for their use is required.

Response: We appreciate the suggestion and agree with the reviewer that the identification of PSGs from 50 avian species here may cause confusion. To emphasize the main purpose of the manuscript, we have removed the analysis of PSGs in 50 avian species, including the description of the branch model used for this analysis in the "Examination of genes under positive selection and enrichment analysis" paragraph in the Materials and Methods section, from the revised manuscript.

1-2: Also, for the divergence time estimate using mitochondrial genomes - Is there any nuclear genome data for the other long-tailed pheasants that can be incorporated into this analysis? If not, please discuss how the use of only mitochondrial data may affect the divergence time estimates.

Response: We appreciate the suggestion. Currently, there is no nuclear genome data available for the copper pheasant, so unfortunately, incorporating all five long-tailed pheasants into our analysis using nuclear genomes is impossible at present. For the other four pheasants, however, Wang N. et al. [1] used six nuclear intron and two mitochondrial gene sequences to construct a phylogenetic tree, and its topology was consistent with our result. Our estimate of the divergence time was more precise, considering that we employed complete mitochondrial genomes in the reconstruction of a high-resolution tree for the *Syrmaticus* genus instead of a few mitochondrial genes. Our estimated divergence time is also supported by the paleogeographical report of Taiwan island formation. Despite these corroborations of the proposed tree topology and estimated divergence time, the use of only mitochondrial data may be considered as a potential limitation. Going forward, it will be necessary to analyze the nuclear genome to obtain further insights into the evolution history of long-tailed pheasants. We have added the paragraph above into the Discussion section.

#### Minor comments

#### Abstract

1-3: Line 78: The second sentence in abstract Background is oddly worded. Please revise. A variant of this sentence is also in Background (line 117).

Response: We apologize for the confusion. We have rephrased the sentence in the abstract section as: "This pheasant provides an opportunity to investigate evolutionary processes following geographic isolation." and the sentence in the background section as: "The Mikado pheasant possesses ideal characteristics for evolutionary research because of its flightlessness and habitat isolation."

1-4: Line 89: "mitochondrial genome was further" would sound better written as "mitochondrial genome was ALSO"

Response: The correction was made.

#### Background

1-5: Lines 112-116: I think that genome resources for endangered species can provide great insight into effective population size. This should be added here.

Response: We appreciate the suggestion, and the suggested text has been added.

1-6: Line 119: "the Syrmaticus genus and belongs" should be written as "the Syrmaticus genus and FORMS (or comprises)"

Response: The correction was made.

1-7: Line 131: change to "insights into its adaptive mechanisms." Remove "of the pheasant".

Response: The correction was made.

#### Results

1-8: Lines 233-234: "between 21.4 and 28.9 million years ago" The Figure has different values - 18.3-27.9. Is the text or figure correct?

Response: We apologize for the confusion. The age between 21.4 and 28.9 million years ago indicates the divergence time of the Phasianidae lineage including 3 birds, Mikado pheasant, turkey, and chicken. The values (18.3-27.9 Mya) in Figure 2 in the revised manuscript represents 95% confidence intervals of the divergence time between the Mikado pheasant and turkey. To avoid the confusion, the sentence was revised to "The estimated time of the Mikado pheasant-turkey divergence was 21.4 million years ago (Mya); the divergence time between chicken and the sister clade of the Mikado pheasant-turkey was estimated at 28.9 Mya."

1-9: Lines 262-265: Please rewrite this first sentence as it is awkward.

Response: We apologize for the confusion. We have rephrased the sentence as: "To detect the genes that evolved rapidly due to positive selection under the influence of high elevation (Mikado pheasant) as opposed to low elevation (chicken, turkey, duck, and zebra finch), ..."

1-10: Line 266: How many PSGs were identified? Please list the number in the text.

Response: We apologize for the confusion. There were 889 PSGs identified and enriched in GO functions. We have added the number in the text.

1-11: Lines 270-272: It should be noted here that PSGs enriched for metabolism constituted the highest number of PSGs as that information is buried in the supplemental files.

Response: A correction was made.

1-12: Lines 327-329, first sentence. The use of "Recently" seems odd as there has been significant work looking at dN/dS ratios in relationship to MHC. Please consider adding more references here and removing "Recently".

Response: We appreciate the suggestion. A correction was made and two references from Harmit Malik's work have been added to strengthen this point.

Reviewer #2: In their study titled "Whole-Genome De Novo Sequencing Reveals Unique Genes that Contributed to the Adaptive Evolution of the Mikado Pheasant", Lee, Hsieh et al. describe a newly sequenced bird genome - which is always a good resource - including some comparative genomics studies. I believe that this work is solid and clearly explained, and as such is of interest and in the scope of GigaScience. I do have some (mostly minor) comments detailed below that I believe would increase

the quality and clarity of the manuscript.

Response: We appreciate the favorable comments.

-----  
GENERAL COMMENTS:  
-----

2-1: - The use of the word "behavior" (adaptive behavior) is misleading. It seems that the authors mean it in the context of adaptive evolutionary history, and I would suggest to reformulate for accuracy (Abstract and Introduction p5 l129).

Response: We apologize for the confusion and have changed the word "behavior" to "evolution" both in the abstract and the introduction (background).

2-2: - some figures could be improved by having more information on the figure instead of in the legend (mostly Figure 3, see detailed comments below)

2-3: - The significance of some data could be improved at a few locations (see detailed comments below)

Responses to 2-2 & 2-3: We appreciate these suggestions and have addressed each issue as described below.

-----  
DETAILED COMMENTS:  
-----

ABSTRACT:

2-4: - The authors emphasize in the abstract the details of their data about the MHC & comparison with chicken: having less details but more scope / significance would improve the abstract.

Response: We appreciate the suggestion and have rephrased the sentence as: "To investigate the molecular evolution of the major histocompatibility complex (MHC) across several avian species, 39 putative genes spanning 227 kb on a contiguous region were annotated and manually curated. The MHC loci of the pheasant revealed a high level of synteny, several rapidly evolving genes, and inverse regions compared to the same loci in the chicken."

INTRODUCTION:

2-5: - p4 l114: what does "behavioral attributes" means here?

Response: We apologize for the confusion. According to the reference paper, Diana Le Duc et al. reported a nocturnal lifestyle in kiwi [2]. We believe that this is an example of a behavioral attribute successfully identified by the genome assembly approach.

2-6: - p4 l114-117: consider splitting this sentence.

Response: We appreciate the suggestion and have made the correction.

2-7: - p5 l1: how was hypoxic stress observed? Is there any citation? Or is this an expectation/extrapolation?

Response: We apologize for the confusion, and this is our expectation/extrapolation. We have removed the word "is" and replaced it with "may be."

2-8: - p5 l138-141: same comment as abstract.

Response: The correction was made.

DATA DESCRIPTION:

2-9: - Refer to the Method section at least one time at the beginning of this section.

Response: We appreciate the suggestion and have added the following descriptive text at the beginning of the Data Description section.

'The details about sample collection, library construction, sequencing, assembly, gene

prediction, and annotation can be found in the “Materials and Methods” section.’

2-10: - p6 l156-158: please revise the formulation of this sentence for clarity. Fig S4 shows that there are in fact a lot of scaffolds with short length, even if indeed most of the genome size is assembled in large scaffolds.

Response: We apologize for the confusion. We have rephrased the sentence as: “... showed that most of the draft genome consisted of large scaffolds; though many short scaffolds were present, they only contributed a small portion of the genome size.”

#### RESULTS:

2-11: - p7 l 176-180: was there a step to verify that the sequencing samples were not contaminated? For example, the bald eagle genome assembly (file from Zhang et al. (2014), Science) has hundreds of bacterial contigs in it (absent from the refseq version because very short), coming from 2 samples contaminated with Yersinia (SRR1176808 and SRR1176809). This can be checked quickly with some software such as Kraken or Taxonomer (with [www.taxonomer.com](http://www.taxonomer.com) - note that for this website, for a bird genome reads would be nearly all unknown or ambiguous). I could not find the data on the SRA at the time of reviewing to look myself.

Response: We appreciate the suggestion. We used Kraken, combining the approaches of aligning reads against both the chicken genome and the assembled genome, as well as alignment against BLAST’s non-redundant nucleotide sequences (NT) database, to perform the post-check for contamination in our assembled genome (Fig. R1 below; S12 in the revised manuscript). In this way, we obtained 31 contaminated scaffolds with 12 587 bp (~0.001% of the total length) including 290 649 (0.088% of total reads) and 300 871 (0.095% of total reads) reads in the 280-bp and 480-bp libraries, respectively. The major contaminating species were phiX174 and E. coli. We then removed these 31 contaminated scaffolds and a related gene, which had neither an annotation nor a classified gene family. Thus, our conclusions in this study were robust and they were not affected by the contamination problem. We have added a new paragraph to describe the details at the end of the “De novo genome assembly” paragraph in the Materials and Methods section.

‘To examine sequencing reads for potential contamination, we used Kraken (version 1.0) [78] with the standard Kraken database to check the paired-end DNA libraries. Classified reads reported by Kraken were further examined using our proposed pipeline (Additional file 1: Fig. S12). Briefly, we employed Bowtie 2 (version 2.3.0) [79] to align these classified reads against the chicken genome reference (Galgal 5.0) downloaded from Ensembl (release 90), collecting unmapped reads and using Bowtie 2 again to align them against the assembled genome of the Mikado pheasant. We then took those reads mapped onto the Mikado pheasant genome and performed BLASTN alignment against the non-redundant nucleotide sequences (NT) database, downloaded from NCBI’s FTP site (on Nov. 16, 2017), using parameters “-outfmt '6 std staxids' -max\_target\_seqs 1 -evalue 1E-10.” Next, we collected reads with alignment length  $\geq 100$  bp (i.e., two thirds of read length), filtering out the reads matching an avian species or with a read count  $< 50$  in a species. The remaining reads were counted and the contaminated scaffolds calculated by applying a cutoff of a read count  $> 20$  on a given scaffold. Finally, we removed 31 contaminated scaffolds with 12 587 bp (~0.001% of the total length) from the assembled genome.’

2-12: - p7 l180-184: unless reads were excluded when mapping at multiple locations, do (some) high coverage regions correspond to repeats?

Response: We appreciate the question. To minimize the effect of repeat sequences, we performed Bowtie 2 alignment with the best alignment of each read to calculate the per-base alignment coverage. (Please refer to response 2-41 for more details.)

2-13: - p8 l202: This sentence would be more clear if “with pheasant scaffolds” was added after “The identities of each chicken chromosome”

Response: We appreciate the suggestion, and the sentence has been rephrased as: “The identities of each chicken chromosome with the scaffolds of Mikado pheasant ...”

2-14: - p8 l208: if this is notable, what is the significance?



Response: Intrachromosomal inversions occur frequently within avian genomes [3-5]. Despite the concrete mechanism being unclear, inversion is thought to play an important role in avian genome evolution, serving as a driver of speciation [6, 7]. For example, a recent study reported that some intrachromosomal inversions in the white-throated sparrow were related to behavioral attributes and feather features [8]. Our manuscript describes the first genome-wide analysis to identify multiple intrachromosomal inversions between the Mikado pheasant and chicken genomes.

2-15: - p8 l217: as expected?

Response: Yes, according to the phylogenetic tree (Fig. 2 in the revised manuscript) and molecular evidence from recent reports [9, 10], the Mikado pheasant is more closely related to the Galliformes order than to the Passeriformes order. Therefore, we can expect that the Mikado pheasant scaffolds were poorly aligned with the zebra finch genome.

2-16: - p8 l218-221: consider having the mention of "high frequency of potentially highly conserved regions" before the "but", to contrast conservation and dynamics.

Response: We appreciate the suggestion, and the sentence has been rephrased as: "In general, the Mikado scaffolds displayed high conservation with the genomes of chicken and turkey. We also observed several intrachromosomal inversions and chromosomal translocations. This is the first genome-wide analysis to identify multiple intrachromosomal inversions between the Mikado pheasant and chicken genomes."

2-17: - p8 l 220: what are the "high frequency" numbers? How does this compare to the literature, if any similar other research?

Response: We apologize for the confusion. Originally, the "high frequency" denoted that the Mikado genome showed high conservation with the genomes of chicken and turkey. To avoid the confusion, we have rephrased the sentence as described above (please refer to response 2-16).

2-18: - p9 l229-230: The formulation here is confusing and should be revised to illustrate better that the 18 220 gene families (as mentioned in the legend of Figure 2) are for all species considered (and not just the Mikado pheasant) - since Figure S8 shows different numbers. Additionally, the number of genes is lower than the number of annotated genes mentioned in the manuscript or than the one in Figure S8; why these three different values?

Response: We apologize for the confusion. The sentence has been rephrased to match the legend of Fig. 2. There are two possible reasons for the different gene numbers from these analyses in the Mikado pheasant. First, the gene families from 10 species (Fig. 2 in the revised manuscript) or 5 birds (Fig. S8) were classified by OrthoMCL using the protein sequences from Ensembl. Considering the phylogenetic relationship, the E-value cutoff for running all-vs-all BLASTP was stricter in the analysis of 5 birds ( $1e-20$ ) than in that of 10 species ( $1e-5$ ) (please refer to Gene families in the Materials and Methods section). Thus, the number of genes in the Mikado pheasant was less in the analysis of 5 birds (14 375 genes) than in the 10 species (15 161 genes). Second, we used a completely different source—the Aves and Reptilians protein sequences from the NCBI NR database—to annotate 15 972 genes in the Mikado pheasant. Although these methods produced different numbers of genes, we believe that the numbers are in a reasonable range for the avian genome, based on a previous study [11].

2-19: - p9 l245: are fragmented annotations a possible issue here? i.e. are longer genes enriched or not in expanded families?

Response: Yes, we believe that fragmented annotations of longer genes may cause the evolutionary rates of expanded families to be overestimated. To reduce the potential errors, we used CAFE 3 to identify expanded and contracted genes in the study (see Gene families in the Materials and Methods section). The authors of CAFE 3 claim that they applied phylogenetic tree information to model the observed family

sizes in the algorithm, which could recover accurate evolutionary rates of gene families with fragmented annotations [12].

2-20: - p9 l246: Are the numbers / rates surprising or not based on the literature?

Response: We did not expect so many gene ontology (GO) categories to be identified. However, the identified GO functions provided straightforward evidence to explain the Mikado pheasant's adaptation to high altitude.

2-21: - p9 l248-259: what about the ones in the chicken for example? And other birds?

Response: Analyzing genes with expansion and contraction is an approach to identify the gene number changes in each gene family. To infer these changes for a specific combination of interest, for example the Mikado pheasant versus chicken, would be ill-advised, due to the limitations of the statistical test provided by CAFE 3. The expansion and contraction can only be identified significantly between a specific species and its common ancestor. Based on the tree topology in Figure 2 in the revised manuscript, for example, chicken can only be compared with the node (labeled 28.9 Mya) which is the common ancestor of chicken and the other node (labeled 21.4 Mya; the common ancestor of the Mikado pheasant and turkey)—neither the Mikado pheasant, nor the turkey itself. For this reason, we cannot directly identify expanded/contracted genes between the Mikado pheasant and chicken/other birds.

2-22: - p9 l258: is 8/75 surprising? What is the fraction of all olfactory receptors among all gene families? Were there more olfactory receptors annotated in the pheasant than other birds? E.g. discuss based on the data from Steiger et al 2008 (DOI: 10.1098/rspb.2008.0607), or other literature if any.

Response: 1) Among the 75 expanded gene families of Mikado pheasant, 8 gene families were annotated as olfactory receptors (ORs). Since the proportion exceeds ten percent, we mentioned this finding in the manuscript to provide the result as a numeric basis for possible comparisons in future studies.

2) There were 12 549 gene families in the Mikado pheasant (total 18 220 gene families in the 10 species). Of these gene families, 44 were OR-related (with 65 genes predicted to be ORs).

3) Steiger et al. compared nine bird species from seven orders (blue tit, black coucal, brown kiwi, canary, galah, red jungle fowl, kakapo, mallard, and snow petrel) and drew the conclusion that the estimated total number of OR genes correlates positively with olfactory capability. However, some of the birds did not have an assembled draft genome at the time of the paper's publication, and some of the OR gene numbers might be overestimated by the authors. For instance, the paper displayed 600 estimated OR genes in the brown kiwi, but there were only 141 presented (82 OR genes were identified from the initial prediction) in a subsequent study when the genome sequence was available [2]. Despite these limitations, we can still compare our result with the kiwi [2]. There were more genes predicted to be ORs in the kiwi (N=82) than in the Mikado pheasant (N=65). However, this difference should not be overinterpreted, since ORs are highly duplicated across the genome, which may produce more overcollapsed contigs during the assembly process. This is a general problem in the short-read sequencing technology.

2-23: - p10 l262: this formulation is unclear: "because of living at and between high and low elevation".

Response: We apologize for the confusion. We have removed the unclear sentence and rephrased as: "To detect the genes that evolve rapidly due to positive selection under the influence of high elevation (Mikado pheasant) as opposed to low elevation (chicken, turkey, duck, and zebra finch), ..."

2-24: - p10 l264: Since these 7132 orthologues seem to be the same as the 7132 single-gene families mentioned in Methods, the change of terminology (gene family v.s. orthologs) is confusing (maybe use orthologs for single-gene families that were also annotated as orthologs by OrthoMCL, and gene families for the others?).

Response: We apologize for the confusion. Gene families contain orthologs and



paralogs. Orthologs (or orthologous genes) indicate genes with similar sequences in different species, whereas paralogs (not part of this study) indicate genes with similar sequences from within the same species. Specifically, orthologs from within a gene family having one gene for each species are called single-copy orthologs (or single-gene families). In the manuscript, we classified gene families using OrthoMCL, and further identified single-copy orthologs from these gene families to construct a phylogenetic tree and analyze positively selected genes. To avoid confusion, we have unified the terminology and used “gene families” and “orthologs” in the revised manuscript.

2-25: - p11 I293: since the Jak-STAT pathway is not mentioned again in discussion, please add why this is worth noticing.

Response: We appreciate the suggestion. The following sentence for discussing the Jak-STAT pathway has been added in the Discussion section.

“Some of these PSGs were also involved in the Jak-STAT signaling pathway (Additional file 1: Table S15), which participates in chemical signal transmission and induces cellular stress responses, such as immunity, apoptosis, [61, 62], and hypoxia [63]. All these results provide wider support for the adaptive evolution of the Mikado pheasant.”

2-26: - p11 I301: this number of 5287 orthologs between 48 birds is identical to the one of orthologs identified in 10 species (with mammals) - please check that this is accurate.

Response: We apologize for the mistake. The correct number of orthologs is 2209.

2-27: - p12 I305: the ubiquitin activity is not mentioned in discussion: what would be the significance of having expanded gene families associated with this GO term?

Response: The GO term associated with ubiquitin activity is associated with the degradation of proteins. The ubiquitin will mark the target protein by forming an isopeptide bond to the lysine residues on the protein. The complex will be sent to the proteasome, and the proteins will be subsequently degraded. Currently, few studies have reported the relationship between ubiquitin activity and phenotype in avian species. Thus, we have insufficient evidence to explain the enrichment of ubiquitin activity in the Mikado pheasant. To emphasize the main purpose of the manuscript, in response to Reviewer #1’s suggestion, we have removed the results of the analysis of positively selected genes in 50 avian species from the Results section.

2-28: - p12 I320: Methods says MAKER, not manual curation; was MAKER used and then the annotations manually curated?

Response: Yes, MAKER was used to predict potential MHC-B genes, and then these genes were manually curated. We apologize for the confusion and have added a new paragraph to describe the details at the end of the “Gene prediction and annotation” paragraph in the Materials and Methods section.

“For MHC-B annotation and curation, we first took the scaffold208 sequence and used MAKER (version 2.31.8) [88] to predict the potential gene structures of MHC-B genes. Next, the RNA-Seq libraries from the Mikado pheasant and the homologous protein sequences from chicken and turkey were aligned to these predicted regions. Finally, we used Web Apollo (version 2.0.3), a web-based and visualization tool for curation and annotation, to manually curate these genes according to the alignment evidence.”

2-29: - p12 I329: there is more general literature on this question (e.g. Harmit Malik’s work and others); adding one or two references would strengthen this point.

Response: We appreciate the suggestion. The two references from Harmit Malik’s work have been added to strengthen this point.

2-30: - p13 I330: BLB2 is mentioned here (probably because found in RNAseq data?), but it is missing from the Figure and afterwards said missing from the Mikado pheasant assembly, which is confusing. Maybe the lines 445 to 451 should be part of this result section instead?

Response: We appreciate the suggestion. We have moved this part to the Results section.

2-31: - p13 I331: see comment about Figure 3

Response: A correction was made (please refer to response 2-48).

2-32: - p13 I240: significance of inversions?

Response: Yes, there are several MHC-related studies reporting that, in the Galliformes order, the TAPBP and/or TAP1-TAP2 blocks are in inverse orientation [13-15]. Wang B. et al. even proposed a hypothesis of MHC evolutionary history in black grouse based on these inversions [16]. In our study, it is the first time to observe them in the Mikado pheasant, and we believe that this finding will have a profound influence on studies of the evolutionary history of the avian MHC.

DISCUSSION:

2-33: - p14 I375: since these extra steps are not detailed in the Method section, the parameters and versions should figure in Table S18 or in additional info.

We apologize for the unclear statement. We have rephrased the paragraph in the Materials and Methods section as follows.

"The quality of the raw reads was examined using FastQC (version 0.10.1). Trimmomatic (version 0.30; parameters: "ILLUMINACLIP:TruSeq3-PE.fa:2:30:15 SLIDINGWINDOW:4:20 MINLEN:100") [76] and NextClip (version 1.3.1) [77] with default parameters were used to trim sequencing reads. Genome assembly into contigs was performed by MaSuRCA (version 2.3.2) [15] with settings based on the instruction manual. ALLPATHS-LG (version 49722) [43], Newbler (version 2.9) [45] both with default parameters, JR (version 1.0.4; parameters: "-minOverlap 60 -maxOverlap 90 -ratio 0.3") [44], SGA (version 0.10.13; parameters: "assemble -m 125 -d 0.4 -g 0.1 -r 10 -l 200") [46], and SOAPdenovo (version 2.04; parameters: "-K 47 -R") [47] were also used to assemble contigs. We employed SSPACE (version 3.0; parameter: "-z 300") [74] to construct scaffolds for the draft genome. In this step, mate pair libraries with 35 bases from the 5' end of both reads were used for scaffolding. Scaffold sequences shorter than 300 bp were then excluded from the final assembly. The statistical results of the assembly were estimated using QUASt (version 3.2) [75]."

2-34: - p15 I387: how were the number of misassembled or fragmented sequences estimated and distinguished from real differences with the chicken genome (since Fig1 is referred to)?

Response: We apologize for the carelessness. We realize that it is difficult to estimate the number of misassembled or fragmented sequences from the information in Fig. 1 only. The degree of fragmented sequences may be distinguished by the composition of lines and points from Fig. 1A; on the other hand, we can expect that the more points on a syntenic map, the more fragmented sequences exist. To clarify the statement, we have rephrased the sentence as: "Although scaffolds of the draft genome displayed some degree of fragmentation (Fig. 1A) and showed translocation (Fig. 1B) in certain chicken chromosomes, ..."

2-35: - p17 I438-441: is there any evidence that these inversions affect the expression of these genes...?

Response: No, there is no study reporting a correlation between these inversions and their gene expression.

2-36: - p17 I445-451: see comment for p13 I330.

Response: A correction was made (please refer to response 2-30).

2-37: - p17 I452: "the whole genome of a genus" would read better as "the whole genome of a bird of the genus"

Response: A correction was made.

**MATERIAL AND METHODS:**

2-38: - p19 I486: were both experiments done on pooled RNA from the 2 males, or was there one male per RNAseq experiment?

Response: We apologize for the confusion. There was one male individual per RNA-Seq experiment.

2-39: - p19 I494: FastQC version and exact tools and parameters used to trim reads and remove adapters?

Response: FastQC version is 0.10.1. The paired-end and mate pair reads were trimmed and adapters removed by Trimmomatic (version 0.30; parameters: "ILLUMINACLIP:TruSeq3-PE.fa:2:30:15 SLIDINGWINDOW:4:20 MINLEN:100") and NextClip (version 1.3.1) with default parameters, respectively. This information is included in the revised text.

2-40: - p19 I496: MaSuRCA reference missing here (even if elsewhere in the ms): Zimin, A. et al. Bioinformatics (2013). doi:10.1093/bioinformatics/btt476

Response: We appreciate the information and a correction was made.

2-41: - p20 I509: were the software's default parameters used? What were the parameters regarding non uniquely mapping reads?

Response: Yes, default parameters were used for both Bowtie 2 and TopHat2. When evaluating per-base alignment coverage and mapping rates for DNA reads, only the best alignment for each read was taken into account. However, when evaluating mapping rates for RNA reads, the non-uniquely mapped reads were considered by TopHat2. Table R1 shows the detailed information for the multi-read alignment. In addition, to improve RNA-Seq mapping rates at Reviewer #3's suggestion, we have replaced Table S5 in Additional file 1 with the results using the STAR alignment program in the revised manuscript.

Table R1: Summary of RNA read mapping rates using TopHat2.

RNA Sample 1 RNA Sample 2

**Reads**

Overall mapping rate (left) †92.5%84.4%  
Multiple mapping rate (left) 6.6%7.5%  
Overall mapping rate (right) †91.4%77.3%  
Multiple mapping rate (right) 6.6%7.6%

**Pairs**

Concordant mapping rate \*88.1%72.4%  
Multiple mapping rate 6.7%7.7%

† Overall mapping rate stands for the ratio of total mapped reads to total reads.

\* Mapped concordantly means the read pairs were aligned to the genome with the expected distances and orientation.

2-42: - p10 I513: Version of BEDTools is missing.

Response: The BEDTools version was 2.23.0. This information is included in the revised text.

2-43: - p21 I533: RepeatMasker version, parameters and library used are missing.

Response: We used RepeatMasker (version 4.0.5, parameter: "-species chicken"), including rmbblastn (version 2.2.23+) as the search engine, RepBase (version 20140131), and RM database (version 20140131), to identify repeat regions. This information is included in the revised text.

2-44: - p22 I565: consider adding the numbers of genes and gene families identified that are not single genes before switching to the Method of ortholog identification.

Response: We appreciate the suggestion. We have added gene and gene family numbers in the sentence as follows.

“Then, 18 220 gene families (including 5287 single-copy orthologs) were obtained from the 10 species, and 13 436 gene families (including 7132 single-copy orthologs) were obtained from the 5 birds by OrthoMCL (version 2.0.9) using default parameters. In the analysis of the 10 different species, 15 161 genes of the Mikado pheasant were grouped into 12 549 gene families. In the analysis of the 5 avian species, 14 375 Mikado pheasant genes were grouped into 12 078 gene families.”

2-45: - p22 l573: bootstraps?

Response: We performed RAxML with 500 bootstrap replicates. This information is included in the revised text.

FIGURES:

FIGURE 1B:

2-46: - point/label differently on the figure scaffolds 1 and 45 (since mentioned in the text), and maybe also the ones that fully align to chicken chromosomes?

Response: We appreciate the suggestion. We have added arrows colored in yellow to indicate scaffolds that fully aligned to the chicken chromosomes; grey arrows are added to point out the multiple alignment ones.

FIGURE2:

2-47: - consider adding numbers per My, to facilitate the comparison between branches.

Response: A correction was made.

FIGURE3:

2-48: - it would help the reader a lot if instead of having a color code for forward/reverse (that information is already coded by the position above or under the bar), the genes could be color coded based on their dN/dS ratios.

Response: We appreciate the suggestion. A dN/dS ratio bar chart has been added under the gene structure boxes to enhance the readability of Figure 3. At the same time, the forward/reverse color codes are retained, since it clearly visualized the gene orientation.

2-49: - the coverage scale does not allow to see lower coverage genes; consider using a log scale?

Response: A correction was made.

SUPP DATA:

2-50: FIGURE S2: does 'habitats available' correspond to where they are found generally, or a protected habitat?

Response: The primary habitats available for the Mikado pheasant include both areas where they are generally found and protected habitats. Regions in national parks are protected habitats, but Shuanggueihu and Tawushan are areas where they are generally found.

2-51: FIGURE S8: see comment for Results p9 l230.

Response: Values in the figure are correct. Please refer to responses 2-18 and 2-44 for more details.

2-52: TABLE S1: which RNAseq was HiSeq and which was HiSanSQ?

Response: We apologize for the confusion and we have added platform information in Table S1.

2-53: TABLE S9: for ex. for the GO:0002504 line, could these annotations be missing from the assembly or be fragmented? Since there are only 2 genes in this family, it sounds possible.

Response: We apologize for the confusion. There were 2 gene families involved in the GO:0002504 function rather than 2 genes in this family. These gene families contained genes in other species instead of the Mikado pheasant. One of these gene families showed significant change in its size, which met our expectation of gene contraction in the Mikado pheasant.

2-54: TABLE S18: see comment about Discussion p14 l375.

Response: We have added detailed steps, parameters, and versions in the Materials and Methods section, so the table is not changed (please refer to response 2-33).

Reviewer #3: The manuscript presents the genome and gene annotation of the Mikado pheasant (MP), a protected species living in geographical isolation and adapted to high altitude habitats. The genome was assembled into 208.8k contigs (>300 bp) and 9,359 scaffolds (>1 kb) using Illumina short read technology of paired-end and mate-pair libraries. Annotation was generated by ab initio and homology based gene predictions and from short-read RNA-seq data which was followed by defining the phylogenetic position of the species and analyses of gene and gene-family evolution. The study provides a genome resource and annotation for the species and contributes to the understanding of gene family evolution for adaptation to high altitude and immunity in birds.

3-1: One of the main aims of the authors was to provide a genomic resource for the MP to support future studies of the species and this work fulfils this aim. Properties of the genome sequence (contig/scaffold N50, coverage, repeat content) is very similar to the medium quality bird genome assemblies released by the Avian Phylogenetic Consortium (Zhang G et al. 2014. Science 346: 1311-1320). The annotation approach should be sufficient and the methods used adequate to define the place of the species in the phylogeny of pheasants as it is built on orthologous peptide regions. Nevertheless the fragmented genome assembly will limit the scope of future analyses which can be done with the assembly. Also, the annotation chiefly relies on annotation from orthologous peptides with only limited information coming from transcriptome sequencing. While it is possible to find gene family expansions and contraction events and infer adaptively evolving regions in key genes, many of the adaptations to high altitude can be assumed to happen at changes in regulatory regions modulating levels of gene expressions, neither of which is even mentioned in the study.

Response: We appreciate the favorable comments. As the reviewer pinpointed, the relation between adaptations to high altitude and changes in regulatory regions modulating levels of gene expression is not mentioned in our manuscript. In this study, we set our sights on the de novo genome assembly of the Mikado pheasant and identification of high-altitude adaptation based on genomic information. Identifying genes related to adaptation from the perspective of gene expression and biologically verifying the findings of this study are all potentially interesting topics and can be set as one of our long-term goals in the research of Mikado pheasants. The following paragraph was added into the Discussion section.

“To sum up, this study reveals the high-altitude adaptation mechanisms of the Mikado pheasant at the genomic level. However, there are some adaptive mechanisms for high altitude that happen via changes in regulatory regions modulating the levels of gene expression [64-66]. We believe that this is an intriguing topic and worthy of further research to be undertaken in the future.”

3-2: My main concern is with the part of the paper which describes the observed differences in the MHC region between the MP and the gal4 chicken assembly. It is known that chr16 of the gal4 assembly contained errors. Unfortunately the authors failed to mention the presence of these errors and how these would affect their results. Chr 16 has got improved in the gal5 assembly (Warren WC et al. 2016 G3 (Bethesda) 7: 109-117.) and the improved sequence would/could have provided a much better reference for this comparison. If, for this part of the work, the authors would realign the

MHC region between MP and chr16 of gal5 that would make their results more reliable and relevant for the bird communities.

Response: We appreciate the suggestion and apologize for the confusion. Instead of the chr16 sequence from the gal4 or gal5 genome references, the chicken MHC-B sequence that we used to compare with the Mikado pheasant was obtained from GenBank (AB268588.1). The sequence was published by Shiina et al. and analyzed DNA molecules from constructed bacterial artificial chromosome (BAC) clones and long-PCR products by Sanger sequencing technology [17]. To avoid the confusion, we have rephrased the sentence as "..., an assembled scaffold (scaffold208) was almost able to cover the known chicken sequence of the MHC-B contiguous region published by Shiina et al. (GenBank Accession: AB268588.1)."

However, out of respect for the reviewer's comment we also realigned the MHC region between the Mikado pheasant and chr16 of gal5 (NC\_006103.4). As shown in Fig. R2, except for the strand orientation, the alignment showed identical results between the AB268588.1 sequence and chr16 of gal5, which proved that our results are reliable.

Apart from the above I found the manuscript generally well written and I only have a few small comments:

3-3: I assumed to find tissue information for the samples from which the genomic short read and RNA-seq data was generated, but could not find it in the materials and methods section (MM).

Response: We apologize for the confusion. Originally, the information on tissue samples was at the beginning of the "De novo genome assembly" paragraph in the Materials and Methods section. To avoid the confusion, the paragraph has been split into an independent paragraph and titled "Sample preparation and sequencing."

3-4: A technical note: TopHat2 was shown to underperform most of the other RNA-seq read mapping softwares (e.g. STAR). As the RNA-seq data is limited and the genome is fragmented the limitations coming from the usage of a "weaker" aligner is probably not that significant for this study.

Response: We appreciate the suggestion. Compared with TopHat2, the mapping rates using STAR (version 2.4.0) with default settings were significantly improved in both of the RNA-Seq samples (Table R2). We have replaced the TopHat2 results with STAR results for the assembly assessment in the revised manuscript.

Table R2: Comparison of RNA read mapping rates using STAR and TopHat2.

| RNA Sample 1         | RNA Sample 2 |
|----------------------|--------------|
| STAR                 |              |
| Total mapped         | 95.8%93.1%   |
| Multiple Mapped      | 2.04%2.04%   |
| Uniquely Mapped      | 93.8%91.1%   |
| TopHat2              |              |
| Mapped concordantly  | 88.1%72.4%   |
| Overall mapping rate | 91.9%80.9%   |

There were a few sentences which I found hard to understand:

3-5: P9: L229. "First, 15 161 Mikado pheasant genes were identified in 18 220 families, and 5287 single-gene families that were common across the 10 species were then used to construct a Bayesian maximum clade credibility phylogenetic tree to estimate the time of divergence"

Do you mean 15,161 genes in 18,220 families? Did you have genes belonging to multiple gene families?

Response: 1) We apologize for the confusion, the 18 220 gene families in total were obtained from the 10 species. There were 15 161 genes of the Mikado pheasant were grouped into 12 549 gene families in the analysis of the 10 different species (please refer to Gene families in the Materials and Methods section). To clarify the statement, we have rephrased the sentence at Reviewer #2's suggestion.



2) No, we performed OrthoMCL to classify gene families. The tool assigned a gene to a gene family.

3-6: P20: L514." Regarding the RNA reads, the mapping rate showed the completeness of the final assembly with respect to the independent sequencing data from the transcriptomes of the Mikado pheasant."

Response: We apologize for the confusion. The sentence has been rephrased as: "Taking the RNA sequencing reads from two individual Mikado pheasants and observing the mapping rate is another approach for assessing the completeness of the assembly."

#### References:

- 1.Wang N, Kimball RT, Braun EL, Liang B and Zhang Z. Assessing phylogenetic relationships among galliformes: a multigene phylogeny with expanded taxon sampling in Phasianidae. PLoS One. 2013;8 5:e64312. doi:10.1371/journal.pone.0064312.
- 2.Le Duc D, Renaud G, Krishnan A, Almen MS, Huynen L, Prohaska SJ, et al. Kiwi genome provides insights into evolution of a nocturnal lifestyle. Genome biology. 2015;16:147. doi:10.1186/s13059-015-0711-4.
- 3.Hooper DM and Price TD. Chromosomal inversion differences correlate with range overlap in passerine birds. Nat Ecol Evol. 2017;1 10:1526-34. doi:10.1038/s41559-017-0284-6.
- 4.Asalam ML, Bastiaansen JW, Crooijmans RP, Vereijken A, Megens HJ and Groenen MA. A SNP based linkage map of the turkey genome reveals multiple intrachromosomal rearrangements between the turkey and chicken genomes. BMC Genomics. 2010;11:647. doi:10.1186/1471-2164-11-647.
- 5.Zhang G, Li C, Li Q, Li B, Larkin DM, Lee C, et al. Comparative genomics reveals insights into avian genome evolution and adaptation. Science. 2014;346 6215:1311-20. doi:10.1126/science.1251385.
- 6.Volker M, Backstrom N, Skinner BM, Langley EJ, Bunzey SK, Ellegren H, et al. Copy number variation, chromosome rearrangement, and their association with recombination during avian evolution. Genome research. 2010;20 4:503-11. doi:10.1101/gr.103663.109.
- 7.Ellegren H. Molecular evolutionary genomics of birds. Cytogenet Genome Res. 2007;117 1-4:120-30. doi:10.1159/000103172.
- 8.Davis JK, Mittel LB, Lowman JJ, Thomas PJ, Maney DL, Martin CL, et al. Haplotype-based genomic sequencing of a chromosomal polymorphism in the white-throated sparrow (*Zonotrichia albicollis*). J Hered. 2011;102 4:380-90. doi:10.1093/jhered/esr043.
- 9.Prum RO, Berv JS, Dornburg A, Field DJ, Townsend JP, Lemmon EM, et al. A comprehensive phylogeny of birds (Aves) using targeted next-generation DNA sequencing. Nature. 2015;526 7574:569-73. doi:10.1038/nature15697.
- 10.Jarvis ED, Mirarab S, Aberer AJ, Li B, Houde P, Li C, et al. Whole-genome analyses resolve early branches in the tree of life of modern birds. Science. 2014;346 6215:1320-31. doi:10.1126/science.1253451.
- 11.Zhang G, Li B, Li C, Gilbert MT, Jarvis ED, Wang J, et al. Comparative genomic data of the Avian Phylogenomics Project. Gigascience. 2014;3 1:26. doi:10.1186/2047-217X-3-26.
- 12.Han MV, Thomas GW, Lugo-Martinez J and Hahn MW. Estimating gene gain and loss rates in the presence of error in genome assembly and annotation using CAFE 3. Mol Biol Evol. 2013;30 8:1987-97. doi:10.1093/molbev/mst100.
- 13.Ye Q, He K, Wu SY and Wan QH. Isolation of a 97-kb minimal essential MHC B locus from a new reverse-4D BAC library of the golden pheasant. PLoS One. 2012;7 3:e32154. doi:10.1371/journal.pone.0032154.
- 14.Chaves LD, Krueth SB and Reed KM. Defining the turkey MHC: sequence and genes of the B locus. J Immunol. 2009;183 10:6530-7. doi:10.4049/jimmunol.0901310.
- 15.Hosomichi K, Shiina T, Suzuki S, Tanaka M, Shimizu S, Iwamoto S, et al. The major histocompatibility complex (Mhc) class IIB region has greater genomic structural flexibility and diversity in the quail than the chicken. BMC Genomics. 2006;7:322. doi:10.1186/1471-2164-7-322.
- 16.Wang B, Ekblom R, Strand TM, Portela-Bens S and Hoglund J. Sequencing of the core MHC region of black grouse (*Tetrao tetrix*) and comparative genomics of the galliform MHC. BMC Genomics. 2012;13:553. doi:10.1186/1471-2164-13-553.

|                                                                                                                                                                                                                                                                                                                                                                                                                                                                                                             |                                                                                                                                                                                                                                                                             |
|-------------------------------------------------------------------------------------------------------------------------------------------------------------------------------------------------------------------------------------------------------------------------------------------------------------------------------------------------------------------------------------------------------------------------------------------------------------------------------------------------------------|-----------------------------------------------------------------------------------------------------------------------------------------------------------------------------------------------------------------------------------------------------------------------------|
|                                                                                                                                                                                                                                                                                                                                                                                                                                                                                                             | 17. Shiina T, Briles WE, Goto RM, Hosomichi K, Yanagiya K, Shimizu S, et al. Extended gene map reveals tripartite motif, C-type lectin, and Ig superfamily type genes within a subregion of the chicken MHC-B affecting infectious disease. J Immunol. 2007;178 11:7162-72. |
| <b>Additional Information:</b>                                                                                                                                                                                                                                                                                                                                                                                                                                                                              |                                                                                                                                                                                                                                                                             |
| <b>Question</b>                                                                                                                                                                                                                                                                                                                                                                                                                                                                                             | <b>Response</b>                                                                                                                                                                                                                                                             |
| Are you submitting this manuscript to a special series or article collection?                                                                                                                                                                                                                                                                                                                                                                                                                               | No                                                                                                                                                                                                                                                                          |
| <b>Experimental design and statistics</b>                                                                                                                                                                                                                                                                                                                                                                                                                                                                   | Yes                                                                                                                                                                                                                                                                         |
| <p>Full details of the experimental design and statistical methods used should be given in the Methods section, as detailed in our <a href="#">Minimum Standards Reporting Checklist</a>. Information essential to interpreting the data presented should be made available in the figure legends.</p> <p>Have you included all the information requested in your manuscript?</p>                                                                                                                           |                                                                                                                                                                                                                                                                             |
| <b>Resources</b>                                                                                                                                                                                                                                                                                                                                                                                                                                                                                            | Yes                                                                                                                                                                                                                                                                         |
| <p>A description of all resources used, including antibodies, cell lines, animals and software tools, with enough information to allow them to be uniquely identified, should be included in the Methods section. Authors are strongly encouraged to cite <a href="#">Research Resource Identifiers</a> (RRIDs) for antibodies, model organisms and tools, where possible.</p> <p>Have you included the information requested as detailed in our <a href="#">Minimum Standards Reporting Checklist</a>?</p> |                                                                                                                                                                                                                                                                             |
| <b>Availability of data and materials</b>                                                                                                                                                                                                                                                                                                                                                                                                                                                                   | Yes                                                                                                                                                                                                                                                                         |
| <p>All datasets and code on which the conclusions of the paper rely must be either included in your submission or deposited in <a href="#">publicly available repositories</a> (where available and ethically appropriate), referencing such data using a unique identifier in the references and in the “Availability of Data and Materials” section of your manuscript.</p> <p>Have you have met the above requirement as detailed in our <a href="#">Minimum Standards Reporting Checklist</a>?</p>      |                                                                                                                                                                                                                                                                             |

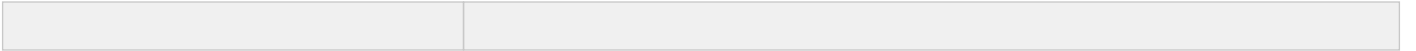

1 **Whole-Genome *De Novo* Sequencing Reveals Unique Genes that**  
2 **Contributed to the Adaptive Evolution of the Mikado Pheasant**

3  
4  
5  
6 Chien-Yueh Lee<sup>1†</sup>, Ping-Han Hsieh<sup>1†</sup>, Li-Mei Chiang<sup>1</sup>, Amrita Chattopadhyay<sup>2</sup>,  
7 Kuan-Yi Li<sup>3,4</sup>, Yi-Fang Lee<sup>1</sup>, Tzu-Pin Lu<sup>5</sup>, Liang-Chuan Lai<sup>6</sup>, En-Chung Lin<sup>7</sup>, Hsinyu  
8 Lee<sup>1,8,9</sup>, Shih-Torng Ding<sup>7,9</sup>, Mong-Hsun Tsai<sup>2,9,10,11</sup>, Chien-Yu Chen<sup>3,9,12\*</sup>, and Eric Y.  
9 Chuang<sup>1,2,5,9,13\*</sup>

10 <sup>1</sup>Graduate Institute of Biomedical Electronics and Bioinformatics, National Taiwan  
11 University, Taipei 10617, Taiwan

12  
13 <sup>2</sup>Bioinformatics and Biostatistics Core, Center of Genomic Medicine, National  
14 Taiwan University, Taipei 10055, Taiwan

15  
16 <sup>3</sup>Department of Bio-Industrial Mechatronics Engineering, National Taiwan University,  
17 Taipei 10617, Taiwan

18  
19 <sup>4</sup>Institute of Plant and Microbial Biology, Academia Sinica, Taipei, 11529, Taiwan

20  
21 <sup>5</sup>Institute of Epidemiology and Preventive Medicine, National Taiwan University,  
22 Taipei 10055, Taiwan

23  
24 <sup>6</sup>Graduate Institute of Physiology, National Taiwan University, Taipei 10051, Taiwan

25  
26 <sup>7</sup>Department of Animal Science and Technology, National Taiwan University, Taipei  
27 10617, Taiwan

28  
29 <sup>8</sup>Department of Life Science, National Taiwan University, Taipei 10617, Taiwan

30  
31 <sup>9</sup>Center for Biotechnology, National Taiwan University, Taipei 10672, Taiwan

32  
33 <sup>10</sup>Institute of Biotechnology, National Taiwan University, Taipei 10672, Taiwan

34  
35 <sup>11</sup>Agricultural Biotechnology Research Center, Academia Sinica, Taipei 11529,  
36 Taiwan University, Taipei, Taiwan

37  
38 <sup>12</sup>Center for Systems Biology, National Taiwan University, Taipei 10672, Taiwan

39

40 <sup>13</sup>Graduate Institute of Chinese Medical Science, China Medical University, Taichung  
41 40402, Taiwan

42

43 † These authors contributed equally to the work.

44

45 \* Corresponding authors:

46 Eric Y. Chuang

47 Department of Electrical Engineering, Graduate Institute of Biomedical Electronics  
48 and Bioinformatics, National Taiwan University, Taipei 10617, Taiwan

49 Phone: +886-2-3366-3660, Fax: +886-2-3366-3682, E-mail: chuangey@ntu.edu.tw

50

51 Chien-Yu Chen

52 Department of Bio-Industrial Mechatronics Engineering, National Taiwan University,  
53 Taipei 10617, Taiwan

54 Phone: +886-2-3366-5334, E-mail: chienyuchen@ntu.edu.tw

55

### 56 **E-mail addresses**

57 Chien-Yueh Lee: d00945006@ntu.edu.tw

58 Ping-Han Hsieh: r04945025@ntu.edu.tw

59 Li-Mei Chiang: dytk2134@gmail.com

60 Amrita Chattopadhyay: amrita@ntu.edu.tw

61 Kuan-Yi Li: kyli.tw@gmail.com

62 Yi-Fang Lee: b01901110@ntu.edu.tw

63 Tzu-Pin Lu: tbenlu@gmail.com

64 Liang-Chuan Lai: llai@ntu.edu.tw

65 En-Chung Lin: eclin@mail2000.com.tw

66 Hsinyu Lee: hsinyu@ntu.edu.tw

67 Shih-Torng Ding: sding@ntu.edu.tw

68 Mong-Hsun Tsai: motiont@ntu.edu.tw

69 Chien-Yu Chen: chienyuchen@ntu.edu.tw

70 Eric Y. Chuang: chuangey@ntu.edu.tw

1  
2  
3  
4  
5  
6  
7  
8  
9  
10  
11  
12  
13  
14  
15  
16  
17  
18  
19  
20  
21  
22  
23  
24  
25  
26  
27  
28  
29  
30  
31  
32  
33  
34  
35  
36  
37  
38  
39  
40  
41  
42  
43  
44  
45  
46  
47  
48  
49  
50  
51  
52  
53  
54  
55  
56  
57  
58  
59  
60  
61  
62  
63  
64  
65

71 **Abstract**

72 **Background:** The Mikado pheasant (*Syrmaticus mikado*) is a nearly endangered  
73 species indigenous to high-altitude regions of Taiwan. This pheasant provides an  
74 opportunity to investigate evolutionary processes following geographic isolation.  
75 Currently, the genetic background and adaptive evolution of the Mikado pheasant  
76 remain unclear.

77 **Results:** We present the draft genome of the Mikado pheasant, which consists of 1.04  
78 Gb of DNA and 15 972 annotated protein-coding genes. The Mikado pheasant  
79 displays expansion and positive selection of genes related to features that contribute to  
80 its adaptive evolution, such as energy metabolism, oxygen transport, hemoglobin  
81 binding, radiation response, immune response, and DNA repair. To investigate the  
82 molecular evolution of the major histocompatibility complex (MHC) across several  
83 avian species, 39 putative genes spanning 227 kb on a contiguous region were  
84 annotated and manually curated. The MHC loci of the pheasant revealed a high level  
85 of synteny, several rapidly evolving genes, and inverse regions compared to the same  
86 loci in the chicken. The complete mitochondrial genome was also sequenced,  
87 assembled, and compared against 4 other long-tailed pheasants. The results from  
88 molecular clock analysis suggest that ancestors of the Mikado pheasant migrated from  
89 the north to Taiwan about 3.47 million years ago.

90 **Conclusions:** This study provides a valuable genomic resource for the Mikado  
91 pheasant, insights into its adaptation to high altitude, and the evolutionary history of  
92 the genus *Syrmaticus*, which could potentially be useful for future studies  
93 investigating molecular evolution, genomics, ecology, and immunogenetics.

94



1 95 **Keywords:** Mikado pheasant, *Syrmaticus mikado*, long-tailed pheasant,  
2  
3 96 whole-genome sequencing, *de novo* genome assembly, adaptive evolution  
4  
5

## 6 97 **Background**

7  
8  
9

10 98 The Mikado pheasant (*Syrmaticus mikado*), which is a long-tailed pheasant  
11  
12 99 indigenous to Taiwan, belongs to the family *Phasianidae* in the order Galliformes  
13  
14 100 (Additional file 1: Fig. S1A, B). The Mikado pheasant is known to inhabit a variety of  
15  
16 101 habitats in the mountainous regions of Central and Southern Taiwan at very high  
17  
18 102 elevations ranging from 1600 to 3500 meters [1, 2]. The Mikado pheasant faced  
19  
20 103 endangerment due to hunting pressure and habitat destruction [3, 4] until it became  
21  
22 104 protected under the Wildlife Conservation Act. Currently, the International Union for  
23  
24 105 Conservation of Nature (IUCN) Red List has classified the Mikado pheasant as a  
25  
26 106 nearly threatened species, showing a decreasing trend in the overall population with a  
27  
28 107 total estimate of approximately 15 000 mature birds. The rare and precious Mikado  
29  
30 108 pheasant is a national icon in Taiwan and is depicted on its 1000 dollar banknote.  
31  
32  
33

34  
35 109 The *de novo* genome assembly of endangered species is an effective approach to  
36  
37 110 identify genomic signatures associated with environmental adaptation and behavioral  
38  
39 111 attributes [5, 6]. Genome resources can also provide great insights into effective  
40  
41 112 population size, genetic defects, and deleterious mutations [7, 8]. Moreover,  
42  
43 113 reconstruction of a phylogenetic tree can reveal genetic relationships and evolutionary  
44  
45 114 history [9-11]. Together they can lead to the conservation and rescue of endangered  
46  
47 115 species.  
48  
49  
50

51  
52 116 The Mikado pheasant possesses ideal characteristics for evolutionary research  
53  
54 117 because of its flightlessness and habitat isolation. It is one of 5 long-tailed pheasants  
55  
56 118 in the *Syrmaticus* genus, which forms a monophyletic group [12]. Due to limited  
57  
58 119 molecular data, very few studies have been conducted to investigate the phylogenetic  
59  
60  
61  
62  
63  
64  
65

1 120 relationships and divergence time of species within the genus. Moreover, the Mikado  
2  
3 121 pheasant is mainly found in Yushan National Park [13], which has numerous  
4  
5 122 extremely high mountains exceeding an altitude of 3000 meters (Additional file 1: Fig.  
6  
7 123 S2). As high altitudes are associated with extremely cold climates and lower  
8  
9 124 concentrations of oxygen, hypoxic stress may be observed in the pheasant.  
10  
11 125 Considering its importance as a species facing endangerment, the present  
12  
13 126 unavailability of genetic information regarding the Mikado pheasant motivated the *de*  
14  
15 127 *novo* assembly of its genome, followed by a detailed study of its genetic background  
16  
17 128 and subsequent adaptive evolution.  
18  
19  
20  
21

22 129 Here we report the whole-genome assembly of the Mikado pheasant and provide  
23  
24 130 insights into its adaptive mechanisms. This genome-wide study reveals the  
25  
26 131 evolutionary adaptation of the Mikado pheasant to high altitudes, including changes in  
27  
28 132 gene family size and/or molecular signatures of positive selection associated with  
29  
30 133 energy metabolism, oxygen transport, hemoglobin binding, radiation response,  
31  
32 134 immune response, and DNA repair. The estimated time of divergence among the 5  
33  
34 135 long-tailed pheasant species reconstructs the evolutionary history of the lineage and  
35  
36 136 allows us to propose a hypothesis for the biogeographical speciation of the Mikado  
37  
38 137 pheasant. Additionally, the manually curated major histocompatibility complex (MHC)  
39  
40 138 gene loci of the Mikado pheasant display evidence for molecular evolution with a  
41  
42 139 high level of synteny, mainly across inverse regions in gene blocks, and several  
43  
44 140 rapidly evolving genes in comparison with the chicken.  
45  
46  
47  
48  
49

50 141

## 54 142 **Data Description**

55  
56  
57 143 The details about sample collection, library construction, sequencing, assembly, gene  
58  
59 144 prediction, and annotation can be found in the “Materials and Methods” section.  
60  
61  
62  
63  
64  
65

145

146 **Results**

147 **Assessment of the assembly quality**

148 The overall DNA mapping rate of the paired-end libraries was >90% for the  
149 concordant paired read alignment and >96% for both paired and single read alignment  
150 (Additional file 1: Table S4). Thus, the assembly utilized most of the DNA reads. We  
151 further examined the per-base alignment coverage. The results (Additional file 1: Fig.  
152 S6) showed that most of the genome positions had a coverage between approximately  
153 57- and 121-fold and an average sequence coverage of 88-fold, which is very similar  
154 to the sequencing depth of DNA paired-end libraries (98.7x). Thus, our draft genome  
155 is well assembled.

156 To evaluate the quality of the assembled genome [20], the RNA reads were  
157 mapped onto the draft genome. The overall alignment rate of both RNA libraries  
158 showed that approximately >93% of the reads could be aligned to the scaffolds,  
159 indicating that most of the expressed protein-coding genes could be found in the draft  
160 genome (Additional file 1: Table S5). Moreover, the BUSCO (BUSCO,  
161 RRID:SCR\_015008) [21] benchmark was used to evaluate the genes predicted from  
162 the genome assembly (Additional file 1: Table S6). Of the 3023 single-copy orthologs  
163 in the vertebrate lineage, approximately 88.6% of the orthologs were found in our  
164 assembly, which is similar to the results obtained in duck (88.6%), turkey (87.5%),  
165 and zebra finch (88.8%). These results suggested that a potentially large number of  
166 genes, along with their complete structure, could be predicted from the genome.

167

168 **Genome comparison**

169 To understand the similarities between the Mikado pheasant and the chicken at the  
170 genomic level, assembled scaffolds that were longer than 0.25% of the aligned  
171 chicken chromosome were selected and plotted onto a syntenic map with an  
172 alignment length of at least 3 kb using MUMmer [22]. The identities of each chicken  
173 chromosome with the scaffolds of Mikado pheasant were between 86.24% and  
174 89.98%, and the overall coverage was 85.28% (i.e., 855.35 Mb of the assembled  
175 scaffolds could be mapped onto the chicken genome; Additional file 1: Table S7). The  
176 syntenic relationships between the Mikado pheasant scaffolds and the chicken  
177 chromosomes were highly conserved, but a few of the chromosomes could be only  
178 partially aligned. In particular, 3 well-assembled scaffolds, i.e., scaffold14, scaffold69,  
179 and scaffold46, were mapped to nearly the full length of chicken chromosomes 15, 23,  
180 and 24, respectively. Notably, compared to the scaffolds of the Mikado pheasant, the  
181 chicken chromosomes, including chromosomes 6, 11, 18, and 21, were properly  
182 aligned, but with obvious inversions (Fig. 1A). More stringent conditions were then  
183 considered to evaluate the alignment of certain scaffolds to multiple chromosomes  
184 (e.g., scaffold1 and scaffold45; Fig. 1B); however, further confirmation is required to  
185 determine whether this finding represents the actual presence of chromosomal  
186 translocations in the Mikado pheasant genome. Additionally, the alignment between  
187 the Mikado pheasant scaffolds and the turkey chromosomes provided similar results  
188 (Additional file 1: Fig. S7A), but the Mikado pheasant scaffolds were poorly aligned  
189 with the zebra finch chromosomes (Additional file 1: Fig. S7B). In general, the  
190 Mikado scaffolds displayed high conservation with the genomes of chicken and  
191 turkey. We also observed several intrachromosomal inversions and chromosomal  
192 translocations. This is the first genome-wide analysis to identify multiple  
193 intrachromosomal inversions between the Mikado pheasant and chicken genomes.

194

195 **Phylogenetic relationships of the Mikado pheasant**

196 To compare the protein sequences of the Mikado pheasant against homologous  
197 protein families of other birds and organisms, OrthoMCL (OrthoMCL DB: Ortholog  
198 Groups of Protein Sequences, RRID:SCR\_007839) [23] was used to define the gene  
199 families in 10 species. Proteins with sequences that were similar to those of the  
200 Mikado pheasant—5 birds (i.e., chicken, duck, flycatcher, turkey, and zebra finch), 2  
201 reptiles (anole lizard and Chinese softshell turtle), and 2 mammals (human and  
202 mouse)—were classified into each gene family. In this way, we obtained 18 220 gene  
203 families in total from 10 species. Next, 5287 single-copy orthologs that were common  
204 across these species were used to construct a Bayesian maximum clade credibility  
205 phylogenetic tree and to estimate the time of divergence [24] (Fig. 2). The estimated  
206 time of the Mikado pheasant-turkey divergence was 21.4 million years ago (Mya); the  
207 divergence time between chicken and the sister clade of the Mikado pheasant-turkey  
208 was estimated at 28.9 Mya. In the Galliformes order, the Mikado pheasant was found  
209 to be more closely related to the turkey than to the chicken. The branches of the  
210 Galliformes and duck (76.4 Mya), Passeriformes and Galliformes (105.3 Mya), and  
211 anole lizard and Aves (266.3 Mya) displayed divergence times that were similar to  
212 those reported in the literature [25-27].

213

214 **Gene family evolution**

215 To assess the changes in the gene family sizes, a likelihood model was used to  
216 examine significant expansions and contractions of gene families, particularly in the  
217 Mikado pheasant lineage. Expansions or contractions in gene families indicate that  
218 total number of genes in a gene family are increasing or decreasing, respectively. The  
219 results revealed 311 expanded and 15 contracted gene families compared with the

1 220 common ancestor of the Mikado pheasant and turkey (Fig. 2). In total, 86 gene  
2  
3 221 ontology (GO) categories were significantly enriched ( $p < 0.05$ , empirical test) among  
4  
5 222 the 311 expanded genes. Fifty of these GO categories were further classified into 8  
6  
7 223 main categories, including actin cytoskeleton, morphogenesis, catalytic activity, cell  
8  
9 224 differentiation, binding, metabolism, cytoplasm, and organelle organization and  
10  
11 225 biogenesis (Additional file 2: Table S8). In particular, the gene families involved in  
12  
13 226 oxygen and heme binding (GO:0019825 and GO:0020037, respectively),  
14  
15 227 monooxygenase activity (GO:0004497), and energy metabolism (GO:0046034, ATP  
16  
17 228 metabolic process; GO:0005977, glycogen metabolic process) were substantially  
18  
19 229 expanded in the Mikado pheasant. Conversely, 7 of the 25 GO categories in the  
20  
21 230 contracted gene families were significantly enriched in immune system processes and  
22  
23 231 apoptosis (Additional file 1: Table S9). From the Pfam database [28], 8 of the 75  
24  
25 232 expanded gene families were annotated as olfactory receptors (Additional file 2:  
26  
27 233 Table S10).  
28  
29  
30  
31  
32  
33  
34  
35

### 36 235 **Positive selection**

37  
38 236 To detect the genes that evolved rapidly due to positive selection under the influence  
39  
40 237 of high elevation (Mikado pheasant) as opposed to low elevation (chicken, turkey,  
41  
42 238 duck, and zebra finch), 7132 single-copy orthologs were analyzed from 9038 genes  
43  
44 239 common across the five species (Additional file 1: Fig. S8). According to the  
45  
46 240 branch-site model and the likelihood ratio test, the 889 positively selected genes  
47  
48 241 (PSGs) identified in the Mikado pheasant were mainly enriched in functions such as  
49  
50 242 metabolism (GO:0008152), cell (GO:0005623), and binding (GO:0005488) that  
51  
52 243 belong to biological process, cellular component, and molecular function ontology  
53  
54 244 terms, respectively. We further examined the PSGs involved in metabolism, which  
55  
56 245 constituted the largest number of PSGs and GO functions (Additional file 1: Fig. S9).  
57  
58  
59  
60  
61  
62  
63  
64  
65



1 246 The 45 PSGs enriched in metabolism-related functions ( $p$ -values  $< 0.05$ ) were  
2  
3 247 classified according to the GOSlim categories into lipid metabolism (GO:0006629),  
4  
5 248 carbohydrate metabolic processes (GO:0005975), and generation of precursor  
6  
7 249 metabolites and energy (GO:0006091), which included 13, 3, and 2 GO functions,  
8  
9  
10 250 respectively (Additional file 2: Table S11). Of these metabolism-related PSGs, 4  
11  
12 251 genes were found to be involved in the inositol phosphate metabolism (map00562;  
13  
14 252  $p$ -value  $< 0.01$ ) and phosphatidylinositol signaling system (map04070;  $p$ -value  $< 0.05$ )  
15  
16  
17 253 through a functional enrichment analysis from the Kyoto Encyclopedia of Genes and  
18  
19 254 Genomes (KEGG (KEGG, RRID:SCR\_012773)) database (Additional file 1: Table  
20  
21 255 S12).

22  
23  
24 256 In addition to metabolism, other high-altitude adaptations were observed, such as  
25  
26 257 response to radiation (GO:0010212, response to ionizing radiation; GO:0010332,  
27  
28 258 response to gamma radiation; GO:0034644, cellular response to UV; and  
29  
30 259 GO:0071480, cellular response to gamma radiation), DNA repair (GO:0000731, DNA  
31  
32 260 synthesis involved in DNA repair; GO:0045739, positive regulation of DNA repair;  
33  
34 261 and GO:0006284, base-excision repair), and oxygen transport (GO:0016706,  
35  
36 262 oxidoreductase activity; GO:0072593, reactive oxygen species metabolic process;  
37  
38 263 GO:0019825, oxygen binding; and GO:2000377, regulation of reactive oxygen  
39  
40 264 species metabolic process; Additional file 2: Table S13). Moreover, 43 PSGs in the  
41  
42 265 Mikado pheasant were significantly enriched in the categories of lymphocyte  
43  
44 266 activation (GO:0046649; including 8 GO terms) and cytokine production  
45  
46 267 (GO:0001816; including 8 GO terms) (Additional file 2: Table S14). We also  
47  
48 268 identified the janus kinase/signal transducer and activator of transcription (Jak-STAT)  
49  
50 269 signaling pathway (map04630;  $p$ -value  $< 0.05$ ), which was enriched in 5 PSGs (i.e.,  
51  
52 270 *BCL2*, *CCND3*, *IL12RB2*, *IL23R*, and *IL7*), in the KEGG analysis (Additional file 1:  
53  
54 271 Table S15).

1 272

2  
3 **273 Identification of the MHC-B region of the Mikado pheasant**

4  
5 274 The MHC is a cluster of genes that is associated with functions such as infectious  
6  
7 275 disease resistance and immune responses in all jawed vertebrates [29]. The MHC  
8  
9  
10 276 B-locus (MHC-B) performs the main MHC functions in the chicken [30, 31]. Based  
11  
12 277 on the above analysis, an assembled scaffold (scaffold208) was almost able to cover  
13  
14 278 the known chicken sequence of the MHC-B contiguous region published by Shiina *et*  
15  
16 279 *al.* (GenBank Accession: AB268588.1) [32] (Fig. 3). To understand the evolution of  
17  
18  
19 280 the MHC-B genes between the Mikado pheasant and the chicken, the predicted gene  
20  
21 281 loci were manually curated by incorporating evidence from the aligned RNA-Seq data  
22  
23  
24 282 and homologous genes from chicken and turkey using Web Apollo software [33].  
25  
26 283 After the curation, 39 putative MHC genes of the Mikado pheasant were identified  
27  
28  
29 284 within a 227 kb sequence (Table 2), including 7 MHC class II loci (*BLB1*, *TAPBP*,  
30  
31 285 *BLB2*, *BRD2*, *DMA*, *DMB1*, and *DMB2*), 4 MHC class I loci (*BF1*, *TAP1*, *TAP2*, and  
32  
33  
34 286 *BF2*), and 5 MHC class III loci (*C4*, *CenpA*, *CYP21*, *TNXB*, and *LTB4R1*).  
35

36 287 Gene loci involved in immunity have been shown to have a higher ratio of  
37  
38 288 nonsynonymous ( $d_N$ ) to synonymous ( $d_S$ ) amino acid substitutions due to interactions  
39  
40  
41 289 with rapidly evolving pathogens under selective pressures [34-36]. *KIFC1*, *BTN1*,  
42  
43 290 *Blec2*, *BLB1*, *BLB2*, and *BF2* had comparatively high  $d_N/d_S$  ratios between the  
44  
45  
46 291 Mikado pheasant and the chicken (Table 2). Conversely, the genes with  
47  
48 292 comparatively lower  $d_N/d_S$  ratios included *TRIM7.2*, *TRIM41*, *BRD2*, and *CenpA*. As  
49  
50  
51 293 shown in Fig. 3, the Mikado pheasant and the chicken displayed similarity in the  
52  
53 294 MHC-B region and shared an almost perfect syntenic gene order. Notably, no *BLB2*  
54  
55 295 genes were predicted between the *TAPBP* and *BRD2* intergenic regions in the Mikado  
56  
57  
58 296 pheasant MHC-B locus; however, these regions could be detected among the  
59  
60 297 transcripts of our RNA-Seq data. A likely explanation for the absence of a prediction

1 298 of the BLB2-like gene might be the existence of 2 unsequenced gap regions with a  
2  
3 299 size of 1098 bp within the *TAPBP-BRD2* block (5931 bp). Since *BLB2* is only 792 bp  
4  
5 300 in length, it could reside within the missing sequence. Based on the RNA-Seq results,  
6  
7 301 2.54 million reads were mapped onto 38 MHC-B genes (except for *BLB2*) of the  
8  
9 302 Mikado pheasant, 27 of which had at least a 1-fold average coverage per nucleotide.  
10  
11 303 Furthermore, 15 genes possessed more than 100-fold average coverage per nucleotide,  
12  
13 304 providing concrete evidence of a reliable prediction. Intriguingly, 2 gene loci, i.e.,  
14  
15 305 *TAPBP* and the *TAP1-TAP2* block, were inversely oriented compared to the chicken  
16  
17 306 sequence.  
18  
19  
20  
21  
22  
23

24 307

### 25 308 **Evolutionary history of *Syrmaticus* pheasants**

26 309 The mitochondrial genome of the Mikado pheasant was assembled based on the  
27  
28 310 short-read libraries. The circular complete genome had a total length of 16 680 bp,  
29  
30 311 including 13 protein-coding genes, 2 rRNAs, 22 tRNAs, and a control region  
31  
32 312 (Additional file 1: Table S16). The average nucleotide composition was 30.52% A,  
33  
34 313 31.20% C, 13.44% G, and 24.84% T. To investigate the evolutionary history of the  
35  
36 314 genus *Syrmaticus*, which includes 5 long-tailed pheasants, the phylogeny was  
37  
38 315 reconstructed, and the divergence times were estimated using the mitochondrial  
39  
40 316 genomes. According to molecular clock analysis, the genetic divergence of the  
41  
42 317 Mikado pheasant began approximately 3.47 (2.78-4.71) Mya (Fig. 4). The tree  
43  
44 318 topology is consistent with previous studies [12, 37], and the divergence time suggests  
45  
46 319 that the Mikado pheasant might have originated in the late Pliocene.  
47  
48  
49  
50  
51  
52  
53

54 320

### 55 321 **Amino acid substitution analysis in Mikado pheasant hemoglobin genes**

56 322 Living at high elevations directly incurs the challenge of low oxygen availability.  
57  
58 323 Additionally, exposure to low-pressure environments causes oxygen saturation in the  
59  
60  
61  
62  
63  
64  
65

1 324 arterial blood, thus decreasing and restricting oxygen supplementation to tissues [38].  
2  
3 325 Certain birds show an increased combined affinity between blood and oxygen via  
4  
5 326 amino acid substitutions in the major hemoglobin [39-41]. To investigate their role in  
6  
7 327 adaptation to high-altitude environments, amino acid substitutions were examined in  
8  
9  
10 328 the Mikado pheasant hemoglobin sequences. By comparing 6 avian species, an amino  
11  
12 329 acid substitution with different consensus residues was found in the Mikado pheasant  
13  
14 330 (Additional file 1: Fig. S10), and the substitution of alanine with threonine occurred at  
15  
16  
17 331 residue 78 of the alpha-A subunit—the major component of hemoglobin isoforms.  
18  
19 332 The Andean goose, a kind of waterfowl living at over 3000 meters in the Andes, has  
20  
21  
22 333 been reported to carry the identical substitution [42].  
23

24 334

### 25 26 335 **Genome assembly and annotation**

27  
28  
29 336 In total, 171.7 Gb of raw DNA sequence reads (Additional file 1: Table S1) were  
30  
31 337 generated, resulting in an approximately 160-fold sequencing coverage based on the  
32  
33  
34 338 1.07 Gb genome size estimated by KmerGenie [14]. The contigs were built and  
35  
36 339 assembled into a 1.04 Gb sequence of the draft genome. The N50 lengths of the  
37  
38 340 contigs and scaffolds were 13.46 kb and 11.46 Mb, respectively. The overall GC  
39  
40  
41 341 content of the Mikado pheasant genome was 41.13%, which is similar to that of the  
42  
43 342 chicken, duck, turkey, and zebra finch (Additional file 1: Fig. S3). The size of the  
44  
45  
46 343 longest assembled sequence was 50.28 Mb, and 928 scaffolds were longer than 10 kb.  
47  
48 344 The basic statistics of both the contigs and scaffolds assembled using MaSuRCA [15]  
49  
50  
51 345 are shown in Table 1. The cumulative length plots (Additional file 1: Fig. S4A, B) and  
52  
53 346 the Nx plot for the scaffolds (Additional file 1: Fig. S5) showed that most of the draft  
54  
55  
56 347 genome consisted of large scaffolds; though many short scaffolds were present, they  
57  
58 348 only contributed a small portion of the genome size.  
59

1 349 Before performing the gene prediction and annotation, the interspersed and low  
2  
3 350 complexity regions were first masked using RepeatMasker (RepeatMasker,  
4  
5 351 RRID:SCR\_012954) [16]. Approximately 8.91% of the sequences were identified as  
6  
7 352 interspersed repeats, 1.32% of the sequences were identified as long tandem repeat  
8  
9 353 (LTR) elements, and overall 11.46% of the total bases were identified (Additional file  
10  
11 354 1: Table S2). After masking the repeats and extrinsic data, an *ab initio* gene prediction  
12  
13 355 was performed using Augustus (Augustus: Gene Prediction, RRID:SCR\_008417) [17],  
14  
15 356 followed by EVidenceModeler [18]. The final gene models comprised 27 254  
16  
17 357 transcripts (proteins). Of the predicted proteins, 15 972 (58.6%) could be strictly  
18  
19 358 aligned to the National Center for Biotechnology Information (NCBI) non-redundant  
20  
21 359 (NR) protein database for Aves and Reptilians. The statistics of annotated genes in the  
22  
23 360 Mikado pheasant averaged 19.9 kb per gene, 1625 bp per coding DNA sequence  
24  
25 361 (CDS), 164.1 bp per exon, and 2053 bp per intron (Additional file 1: Table S3), which  
26  
27 362 are similar composition in length to other avian species [19]. Out of the 15 972 NR  
28  
29 363 annotated proteins, 14 124 proteins were well annotated to the Pfam domains. A total  
30  
31 364 of 5626 Pfam domains were identified based on our predictions.  
32  
33  
34  
35  
36  
37  
38  
39  
40  
41

## 42 366 **Discussion**

43  
44  
45 367 In this study, experimental data and statistical approaches were used to evaluate  
46  
47 368 the genome assembly of the Mikado pheasant. Notably, the genome sequence of this  
48  
49 369 species was previously unknown, and this study provides a comparative analysis of  
50  
51 370 various genomes using a large number of tools at different stages for the assembly of  
52  
53 371 the Mikado pheasant genome. While conducting the genome assembly, we used not  
54  
55 372 only MaSuRCA but also assembly tools, such as ALLPATHS-LG [43], JR [44],  
56  
57 373 Newbler [45], SGA [46], and SOAPdenovo [47]. All these assembly tools produced  
58  
59  
60  
61  
62  
63  
64  
65

1 374 similar draft genome sizes, and MaSuRCA and SGA also showed similar results in  
2  
3 375 terms of the N50 value and the scaffold number (Additional file 1: Table S17). To  
4  
5 376 facilitate the downstream analysis, we used several methods to compare these  
6  
7 377 assembly sets. However, no single assembly tool outperformed the others in terms of  
8  
9 378 the number of annotations for the predicted genes, the quality of the genome  
10  
11 379 compared to that of other birds, and the BUSCO benchmark. In this study, the draft  
12  
13 380 genome assembled using MaSuRCA was selected because it generated dramatically  
14  
15 381 longer scaffolds that displayed a decent score on the BUSCO benchmark and  
16  
17 382 produced proper annotations for the predicted genes. Although scaffolds of the draft  
18  
19 383 genome displayed some degree of fragmentation (Fig. 1A) and showed translocation  
20  
21 384 (Fig. 1B) in certain chicken chromosomes, our approach still provides a practical  
22  
23 385 strategy for whole-genome assembly using only short-read sequencing technology.  
24  
25 386 We assert that the high coverage of our sequencing data, differing library insert sizes,  
26  
27 387 and the use of a combination of tools, such as MaSuRCA and SSPACE for assembly  
28  
29 388 and scaffolding, respectively, contributed to high-quality *de novo* assembly of the  
30  
31 389 Mikado pheasant genome with a genome length of approximately 1 Gb.

32  
33  
34 390 Recent studies have reported phylogenetic tree topologies for the Mikado  
35  
36 391 pheasant and other Galliformes birds [37, 48, 49]; however, these studies relied on  
37  
38 392 small amounts of genomic DNA as supporting evidence. To obtain a highly accurate  
39  
40 393 phylogenetic inference, long DNA sequences are necessary for the reconstruction of a  
41  
42 394 high-resolution tree [50-52]. This study used whole-exome information, with 5287  
43  
44 395 single-copy orthologs totaling approximately 8 Mb of coding sequence, to reconstruct  
45  
46 396 the phylogeny and estimate the divergence time among the Mikado pheasant and  
47  
48 397 other birds (Fig. 2). Our results strongly suggest that the Mikado pheasant is more  
49  
50 398 similar to the turkey than the chicken in the Galliformes clade, which is consistent  
51  
52 399 with previous studies [37, 48, 49].

1 400 We additionally implemented a comprehensive phylogenetic analysis strategy to  
2  
3 401 obtain information regarding the adaptive mechanisms of the Mikado pheasant to high  
4  
5 402 elevations. Compared to birds living at low altitudes, both the positive gene selection  
6  
7 403 and gene expansion analyses showed a significant enrichment of genes relevant to  
8  
9 404 energy metabolism (Additional file 2: Tables S8 and S11). This finding was  
10  
11 405 consistent with the prior study that identified similar genes in other species inhabiting  
12  
13 406 the highlands [53]. Moreover, the 4 metabolism-related PSGs (i.e., *INPP5A*, *INPP5J*,  
14  
15 407 *PI4KB*, and *PLCE1*) that were involved in the inositol phosphate metabolism and  
16  
17 408 phosphatidylinositol signaling system (Additional file 1: Table S12) were previously  
18  
19 409 reported to be enriched in Tibetan pigs living at high altitudes [54]. Of these genes,  
20  
21 410 *INPP5A* and *INPP5J* play a role in the hydrolysis of inositol polyphosphates [55],  
22  
23 411 *PI4KB* is a phosphatidylinositol kinase that induces phosphorylation reactions [56],  
24  
25 412 and *PLCE1*, which is a phospholipase enzyme, regulates gene expression, cell growth,  
26  
27 413 and differentiation [57]. Another robust signal of its adaptation to high altitude was  
28  
29 414 obtained from genes significantly associated with expansion of and positive selection  
30  
31 415 for the enhancement of hemoglobin binding and oxygen transport (Additional file 2:  
32  
33 416 Tables S8 and S13). Furthermore, for both the Mikado pheasant and Andean goose,  
34  
35 417 an amino acid substitution was identified in the hemoglobin alpha-A subunit  
36  
37 418 (Additional file 1: Fig. S10). The substitution of threonine at this position has recently  
38  
39 419 been shown to cause an increase in the molecular volume, which might enhance the  
40  
41 420 solubility of hemoglobin and facilitate adaptation to desiccating and high-altitude  
42  
43 421 environments [42]. Through gene expansion, the genes of the Mikado pheasant that  
44  
45 422 are involved in skeletal and cardiac muscle fiber development (Additional file 2:  
46  
47 423 Table S8) and the enhanced functions of the additional GO terms implied that the  
48  
49 424 biomass of the Mikado pheasant could be effectively produced in mountainous  
50  
51 425 regions without nourishment, hence strongly suggesting the existence of an adaptive  
52  
53  
54  
55  
56  
57  
58  
59  
60  
61  
62  
63  
64  
65

1 426 mechanism for high altitudes [58]. Finally, the PSGs in the radiation response,  
2  
3 427 immune response, and DNA repair categories (Additional file 2: Tables S13 and S14)  
4  
5 428 may reflect the increased resistance of the Mikado pheasant to long-term ultraviolet  
6  
7 429 radiation exposure through the induction of cytokine production [59] and lymphocyte  
8  
9  
10 430 activation [60] and DNA repair processes. Some of these PSGs were also involved in  
11  
12 431 the Jak-STAT signaling pathway (Additional file 1: Table S15), which participates in  
13  
14 432 chemical signal transmission and induces cellular stress responses, such as immunity,  
15  
16  
17 433 apoptosis, [61, 62], and hypoxia [63]. All these results provide wider support for the  
18  
19 434 adaptive evolution of the Mikado pheasant. To sum up, this study reveals the  
20  
21 435 high-altitude adaptation mechanisms of the Mikado pheasant at the genomic level.  
22  
23  
24 436 However, there are some adaptive mechanisms for high altitude that happen via  
25  
26  
27 437 changes in regulatory regions modulating the levels of gene expression [64-66]. We  
28  
29 438 believe that this is an intriguing topic and worthy of further research to be undertaken  
30  
31 439 in the future.

32  
33  
34 440 In this work, we annotated and curated the MHC-B gene loci in the Mikado  
35  
36 441 pheasant, which is important for assessing the adaptive mechanisms associated with  
37  
38 442 endangered species, because variations in gene number in the MHC cluster could be  
39  
40  
41 443 caused by exposure to pathogens or diseases [67, 68]. The genome of the Mikado  
42  
43 444 pheasant contains a number of MHC-B genes, and inversions were observed in the  
44  
45 445 *TAPBP* locus and the *TAPI-TAP2* block (Fig. 3) compared to the chicken genome; an  
46  
47 446 inverse orientation of the *TAPI-TAP2* block was also detected compared to the turkey  
48  
49  
50 447 genome (Additional file 1: Fig. S11). A similar conversion at the MHC locus in  
51  
52 448 Galliformes has been reported in previous studies [29, 34, 69]. We further observed a  
53  
54 449 *Blec2*-like sequence with an inverse orientation located within the *BGI-Blec2* region  
55  
56  
57 450 in the Mikado pheasant. We inferred that this region is likely similar to the *Blec4*  
58  
59 451 pseudogene of the chicken and highly similar to *Blec2* [32].



1 452 In this study, we not only sequenced the whole genome of a bird of the  
2  
3 453 *Syrmaticus* genus but also completed the full mitochondrial genome. Before  
4  
5 454 whole-genome sequences were available, mitochondrial sequences were widely  
6  
7 455 utilized in molecular phylogenetic analyses of the genus of *Gallus* [70, 71]. Based on  
8  
9 456 the assembly of the Mikado pheasant and the other 4 available sequences, we  
10  
11 457 reconstructed a phylogenetic tree and provide a completely sequenced mitochondrial  
12  
13 458 genome for 5 long-tailed pheasants. The topology of our reconstructed tree (Fig. 4) is  
14  
15 459 consistent with results from a previous study [12]. However, the time of divergence  
16  
17 460 was estimated to be earlier than the previously reported time [12] for the Mikado  
18  
19 461 pheasant, which might have been due to the use of a few mitochondrial or nuclear  
20  
21 462 genes rather than the complete mitochondrial genome. The reconstructed tree showed  
22  
23 463 a potential migration pathway of these pheasants. The ancestors of the Mikado  
24  
25 464 pheasant, which have been described to have migrated to the island of Taiwan,  
26  
27 465 separated from the lineage of the copper pheasant (*S. soemmerringii ijimae*). The  
28  
29 466 copper pheasant is a pheasant indigenous to Japan, whose ancestors might have  
30  
31 467 separated from the lineage of the Reeves's pheasant (*S. reevesii*) that has inhabited in  
32  
33 468 Northern China. The ancestors of Elliot's pheasant (*S. ellioti*) and Mrs. Hume's  
34  
35 469 pheasant (*S. humiae*) have branched from the Mikado pheasant, then separated into  
36  
37 470 two present kinds of pheasants that have alternatively roosted in the mountainous  
38  
39 471 forests of Southeastern and Southwestern China, respectively. According to  
40  
41 472 paleogeographical reports, Taiwan was formed approximately 4-5 Mya and attained  
42  
43 473 its modern topography approximately 3 Mya [72]. The sea level was lower during the  
44  
45 474 glacial periods, and Taiwan might have been connected to the mainland [73]. Our  
46  
47 475 results suggest that the evolutionary history of the Mikado pheasant might have  
48  
49 476 included ancestors that migrated from the north towards Taiwan approximately 3.47  
50  
51  
52  
53  
54  
55  
56  
57  
58  
59  
60  
61  
62  
63  
64  
65

1 477 Mya and consequently were isolated by the Taiwan Strait during the warm interglacial  
2  
3 478 periods during the early Pleistocene.  
4

5 479 Currently, there is no nuclear genome data available for the copper pheasant, so  
6  
7 480 unfortunately, incorporating all five long-tailed pheasants into our analysis using  
8  
9 481 nuclear genomes is impossible at present. For the other four pheasants, however,  
10  
11 482 Wang N. *et al.* [37] used six nuclear intron and two mitochondrial gene sequences to  
12  
13 483 construct a phylogenetic tree, and its topology was consistent with our result. Our  
14  
15 484 estimate of the divergence time was more precise, considering that we employed  
16  
17 485 complete mitochondrial genomes in the reconstruction of a high-resolution tree for the  
18  
19 486 *Syrmaticus* genus instead of a few mitochondrial genes. Our estimated divergence  
20  
21 487 time is also supported by the paleogeographical report of Taiwan island formation.  
22  
23 488 Despite these corroborations of the proposed tree topology and estimated divergence  
24  
25 489 time, the use of only mitochondrial data may be considered as a potential limitation.  
26  
27 490 Going forward, it will be necessary to analyze the nuclear genome to obtain further  
28  
29 491 insights into the evolution history of long-tailed pheasants.  
30  
31  
32  
33  
34  
35  
36

## 37 492 **Materials and Methods**

### 38 39 40 41 493 **Sample preparation and sequencing**

42  
43 494 Blood samples were collected from a single female Mikado pheasant living in Central  
44  
45 495 Taiwan; then, genomic DNA was extracted, and 2 paired-end libraries (280 bp and  
46  
47 496 480 bp; average read length: 151 bp) and 5 mate pair libraries (1, 3, 5, 7, and 10 kb;  
48  
49 497 average read length: 101 bp) were constructed according to the manufacturer's  
50  
51 498 protocol. In addition, 2 RNA-Seq libraries from 2 male Mikado pheasants' blood  
52  
53 499 samples were prepared for the purpose of draft genome assessment and gene  
54  
55 500 prediction (Additional file 1: Table S1). The DNA libraries were sequenced using the  
56  
57  
58  
59  
60  
61  
62  
63  
64  
65

1 501 HiSeq platform (Illumina Inc., San Diego, CA, USA), and the RNA libraries were  
2  
3 502 sequenced using the HiScanSQ and HiSeq platforms.  
4

5 503

6  
7 504 ***De novo genome assembly***  
8

9  
10 505 The quality of the raw reads was examined using FastQC (FastQC,  
11  
12 506 RRID:SCR\_014583), version 0.10.1. Trimmomatic (Trimmomatic,  
13  
14 507 RRID:SCR\_011848), version 0.30 (parameters:  
15  
16  
17 508 “ILLUMINACLIP:TruSeq3-PE.fa:2:30:15 SLIDINGWINDOW:4:20 MINLEN:100”)  
18  
19 509 [76] and NextClip (version 1.3.1) [77] with default parameters were used to trim  
20  
21 510 sequencing reads. Genome assembly into contigs was performed by MaSuRCA  
22  
23 511 (version 2.3.2) [15] with settings based on the instruction manual. ALLPATHS-LG  
24  
25 512 (ALLPATHS-LG, RRID:SCR\_010742, version 49722) [43], Newbler (version 2.9)  
26  
27 513 [45] both with default parameters, JR (version 1.0.4; parameters: “-minOverlap 60  
28  
29 514 -maxOverlap 90 -ratio 0.3”) [44], SGA (version 0.10.13; parameters: “assemble -m  
30  
31 515 125 -d 0.4 -g 0.1 -r 10 -l 200”) [46], and SOAPdenovo (version 2.04; parameters: “-K  
32  
33 516 47 -R”) [47] were also used to assemble contigs. We employed SSPACE (SSPACE,  
34  
35 517 RRID:SCR\_005056, version 3.0; parameter: “-z 300”) [74] to construct scaffolds for  
36  
37 518 the draft genome. In this step, mate pair libraries with 35 bases from the 5’ end of both  
38  
39 519 reads were used for scaffolding. Scaffold sequences shorter than 300 bp were then  
40  
41 520 excluded from the final assembly. The statistical results of the assembly were  
42  
43 521 estimated using QUAST (version 3.2) [75].  
44  
45  
46  
47  
48  
49

50 522 To examine sequencing reads for potential contamination, we used Kraken  
51  
52 523 (version 1.0) [78] with the standard Kraken database to check the paired-end DNA  
53  
54 524 libraries. Classified reads reported by Kraken were further examined using our  
55  
56 525 proposed pipeline (Additional file 1: Fig. S12). Briefly, we employed Bowtie 2  
57  
58 526 (Bowtie, RRID:SCR\_005476; version 2.3.0) [79] to align these classified reads  
59  
60  
61  
62  
63  
64  
65

1 527 against the chicken genome reference (Galgal 5.0) downloaded from Ensembl (release  
2  
3 528 90), collecting unmapped reads and using Bowtie 2 again to align them against the  
4  
5 529 assembled genome of the Mikado pheasant. We then took those reads mapped onto  
6  
7 530 the Mikado pheasant genome and performed BLASTN alignment against the  
8  
9 531 non-redundant nucleotide sequences (NT) database, downloaded from NCBI's FTP  
10  
11 532 site (on Nov. 16, 2017), using parameters "--outfmt '6 std staxids' -max\_target\_seqs 1  
12  
13 533 -evalue 1E-10." Next, we collected reads with alignment length  $\geq 100$  bp (i.e., two  
14  
15 534 thirds of read length), filtering out the reads matching an avian species or with a read  
16  
17 535 count  $< 50$  in a species. The remaining reads were counted and the contaminated  
18  
19 536 scaffolds calculated by applying a cutoff of a read count  $> 20$  on a given scaffold.  
20  
21 537 Finally, we removed 31 contaminated scaffolds with 12 587 bp ( $\sim 0.001\%$  of the total  
22  
23 538 length) from the assembled genome.  
24  
25  
26  
27  
28  
29  
30

#### 31 **Evaluation of assembly quality**

32  
33  
34 541 Several metrics were used to evaluate the assembly quality, including the number and  
35  
36 542 length distribution of the scaffold sequences, the mapping rate of the paired-end DNA  
37  
38 543 reads and RNA reads, the per-base coverage of the DNA read mapping, and the  
39  
40 544 coverage of universal single-copy orthologs provided by BUSCO (version 1.21). To  
41  
42 545 evaluate the mapping rate of the reads and per-base coverage, the paired-end DNA  
43  
44 546 reads and RNA reads were aligned against the assembled scaffolds using Bowtie 2  
45  
46 547 (version 2.2.4) and STAR [81], respectively. Briefly, scaffolds were mainly  
47  
48 548 assembled from the paired-end DNA reads, and the higher mapping rate of the  
49  
50 549 paired-end DNA reads suggests a higher degree of the final assembly covering the  
51  
52 550 raw reads. Taking the RNA sequencing reads from two individual Mikado pheasants  
53  
54 551 and observing the mapping rate is another approach for assessing the completeness of  
55  
56 552 the assembly. The per-base DNA read coverage was calculated using BEDTools  
57  
58  
59  
60  
61  
62  
63  
64  
65

1 553 (BEDTools, RRID:SCR\_006646), version 2.23.0 [82]. For each base, the expected  
2  
3 554 coverage should be close to the sequencing depth of the paired-end reads  
4  
5 555 (approximately 98.7x). The BUSCO benchmark is a single-copy ortholog set derived  
6  
7 556 from the species of a major lineage. The gene models predicted from the draft genome  
8  
9 557 in the Mikado pheasant were compared with the lineage of vertebrates (3023  
10  
11 558 single-copy orthologs in total) provided by BUSCO. Protein sequences from the  
12  
13 559 chicken, duck, turkey, and zebra finch were also evaluated for comparison.  
14  
15  
16  
17  
18

19 560

### 20 561 **Genome comparison**

21  
22 562 To compare the genome of the Mikado pheasant with that of other avian species, we  
23  
24 563 retrieved the whole-genome sequences of the chicken (Galgal4), turkey (UMD2) and  
25  
26 564 zebra finch (taeGut3.2.4) from the Ensembl database. Using the genome-wide  
27  
28 565 sequence aligner MUMmer (version 3.23), the chromosome-level differences and  
29  
30 566 similarities among the species were investigated and visualized. The structural  
31  
32 567 variants among the species were further reported using the “show-diff” utility in  
33  
34 568 MUMmer. The chord diagrams of the alignment were generated using Circos [83].  
35  
36  
37  
38

39 569

### 40 570 **Gene prediction and annotation**

41  
42 571 First, RepeatMasker (version 4.0.5; parameter: “-species chicken”), including  
43  
44 572 rmblastn (version 2.2.23+) as the search engine, RepBase (version 20140131), and  
45  
46 573 RM database (version 20140131), were applied to screen the scaffolds for  
47  
48 574 interspersed repeats and low-complexity regions in the DNA sequences, and the  
49  
50 575 masked genome was used for further gene prediction. Then, homology-based,  
51  
52 576 RNA-Seq, and *ab initio* prediction approaches were used to identify protein-coding  
53  
54 577 genes and build a consensus gene set that included all predicted genes. For the  
55  
56 578 homology protein sequence alignment, the protein sequences of the chicken (Galgal4),  
57  
58  
59  
60  
61  
62  
63  
64  
65

1 579 turkey (UMD2), duck (BGI\_duck\_1.0) and zebra finch (taeGut3.2.4) were collected  
2  
3 580 from Ensembl. The protein sequence alignments were performed using Exonerate  
4  
5 581 (version 2.2.0) [84]. All RNA-Seq reads were aligned against the repeat-masked  
6  
7 582 genome using TopHat2 [80], which generated evidence of splice sites, introns, and  
8  
9 583 exons. Additionally, Trinity (Trinity, RRID:SCR\_013048), version 2.0.6, [85] was  
10  
11 584 utilized to assemble transcripts, and PASA (version 2.0.0) [86] was used to group  
12  
13 585 alternatively spliced isoforms. For the *ab initio* gene prediction, the standard  
14  
15 586 Augustus (version 3.0.3) pipeline was used to yield potentially predicted genes with  
16  
17 587 evidence from both homologous proteins and RNA-Seq. Next, the consensus gene set  
18  
19 588 was determined by consolidating the 3 types of gene prediction using  
20  
21 589 EvidenceModeler (version 1.1.1). Finally, the gene annotations were defined based  
22  
23 590 on the best sequence alignment against NCBI NR proteins in Aves and Reptilians  
24  
25 591 using BLASTP (version 2.2.29+), with the following criteria: identity  $\geq$  30%,  
26  
27 592 alignment length  $\geq$  80 bp, and E-value  $\leq$  1e<sup>-5</sup>. For the protein domain identification,  
28  
29 593 we annotated the domains using HMMER (version 3.1b2) [87] by scanning the Pfam  
30  
31 594 database (version 30.0).

32  
33  
34 595 For MHC-B annotation and curation, we first took the scaffold208 sequence and  
35  
36 596 used MAKER (version 2.31.8) [88] to predict the potential gene structures of MHC-B  
37  
38 597 genes. Next, the RNA-Seq libraries from the Mikado pheasant and the homologous  
39  
40 598 protein sequences from chicken and turkey were aligned to these predicted regions.  
41  
42 599 Finally, we used Web Apollo (version 2.0.3), a web-based and visualization tool for  
43  
44 600 curation and annotation, to manually curate these genes according to the alignment  
45  
46 601 evidence.

47  
48  
49  
50  
51  
52  
53  
54  
55 602

1       603   **Gene families**

2  
3       604   To identify gene families, the protein-coding genes of 5 birds (i.e., *Gallus gallus*,  
4  
5       605   *Meleagris gallopavo*, *Anas platyrhynchos*, *Taeniopygia guttata*, and *Ficedula*  
6  
7       606   *albicollis*) and 4 additional species (*Anolis carolinensis*, *Pelodiscus sinensis*, *Homo*  
8  
9       607   *sapiens*, and *Mus musculus*) were downloaded from Ensembl (release 82). The  
10  
11       608   sequence of the longest isoform was selected to represent the gene for each species,  
12  
13       609   despite the presence of protein isoforms. The all-vs-all BLASTP was applied to align  
14  
15       610   all protein sequences (including those of the Mikado pheasant) of the 10 species and 5  
16  
17       611   birds (excluding flycatcher) with E-value thresholds less than  $1e^{-5}$  and  $1e^{-20}$ ,  
18  
19       612   respectively. Then, 18 220 gene families (including 5287 single-copy orthologs) were  
20  
21       613   obtained from the 10 species, and 13 436 gene families (including 7132 single-copy  
22  
23       614   orthologs) were obtained from the 5 birds by OrthoMCL (version 2.0.9) using default  
24  
25       615   parameters. In the analysis of the 10 different species, 15 161 genes of the Mikado  
26  
27       616   pheasant were grouped into 12 549 gene families. In the analysis of the 5 avian  
28  
29       617   species, 14 375 Mikado pheasant genes were grouped into 12 078 gene families. Next,  
30  
31       618   MUSCLE (MUSCLE, RRID:SCR\_011812), version 3.8.1551, [89] was used with  
32  
33       619   default parameters for the multiple sequence alignment of the converted coding DNA  
34  
35       620   sequences from single-copy orthologs, and Gblocks (version 0.91b; parameters: “-t=d  
36  
37       621   -b4=5 -b5=h -e=\_cln”) [90] was used to remove the poorly aligned regions. After  
38  
39       622   trimming, the genes from each species were concatenated using the same order to  
40  
41       623   reconstruct the phylogenies and evaluate the divergence time. The concatenated  
42  
43       624   sequences were used to build a phylogenetic tree using RAxML (RAxML,  
44  
45       625   RRID:SCR\_006086), version 8.2.4, [91] via a maximum likelihood search with 500  
46  
47       626   bootstrap replicates; then, the divergence time was analyzed using BEAST (BEAST,  
48  
49       627   RRID:SCR\_010228), version 2.3.2, with the GTR+I+ $\Gamma$  model, which is the best  
50  
51       628   substitution model selected by Modeltest (version 3.7) and PAUP\* (version 4.0a150)

1 629 [92]. Four nodes were chosen as the fossil calibration points from the TimeTree  
2  
3 630 database [93], including human-chicken (311.9 Mya), anole lizard-chicken (279.7  
4  
5 631 Mya), Chinese softshell turtle-chicken (253.7 Mya), and human-mouse (89.8 Mya).  
6  
7 632 The phylogenetic tree was generated using the Strap R package [94]. To identify the  
8  
9 633 gene families with a expansion or contraction between the Mikado pheasant and other  
10  
11 634 species, CAFE (version 3.1) [95] was used to estimate the rates of gene family  
12  
13 635 evolution from the observed gene numbers in each family and the given phylogenetic  
14  
15 636 tree. A  $p$ -value  $< 0.05$  was used to indicate significant changes in the gene family  
16  
17  
18  
19 637 size.  
20  
21

22 638

### 23 24 639 **Examination of genes under positive selection and enrichment analysis**

25  
26 640 To determine the genes that underwent positive natural selection in the Mikado  
27  
28 641 pheasant, CODEML from PAML (PAML, RRID:SCR\_014932), version 4.8, [96]  
29  
30 642 was applied to the branch-site model to investigate the genes in positively selected  
31  
32 643 sites of the Mikado pheasant. For the branch-site model, we implemented likelihood  
33  
34 644 ratio tests to determine the statistical significance of positive selection for testing a  
35  
36 645 null model (model = 2, NSsites = 2, fix\_omega = 1, and omega = 1) against an  
37  
38 646 alternative model (model = 2, NSsites = 2, and fix\_omega = 0). Consequently, the  
39  
40 647 false discovery rates (FDRs) were computed with a cutoff of 0.05 to adjust for  
41  
42 648 multiple testing using the Benjamini-Hochberg procedure.  
43  
44  
45  
46  
47

48 649 The GO annotations of 4 birds (i.e., chicken, duck, turkey, and zebra finch)  
49  
50 650 retrieved from the Ensembl BioMart were used to characterize the functions of the  
51  
52 651 identified orthologs. A hypergeometric test was performed to identify significant GO  
53  
54 652 functions in these orthologs. However, the raw  $p$ -values of the hypergeometric tests  
55  
56 653 can easily be affected by the number of genes [97]; therefore, to address the  
57  
58 654 underlying bias of the hypergeometric distribution, we further calculated empirical  
59  
60  
61  
62  
63  
64  
65



1 655 *p*-values [98]. The empirical *p*-values were determined through 100K simulated  
2  
3 656 datasets by ranking the hypergeometric probability of enriched functional categories  
4  
5 657 compared with the null baseline probabilities. The null baseline probability was  
6  
7 658 established by randomly selecting a group of genes containing an equal number of  
8  
9  
10 659 PSGs with an FDR < 0.05 for the branch-site model. For massively enriched GO  
11  
12 660 terms with similar functions, CateGORizer [99] was used to classify the genes into  
13  
14 661 basic categories. ClueGO [100] with the hypergeometric test and a Bonferroni  
15  
16 662 adjustment were performed to enrich the KEGG pathways [101].  
17  
18  
19  
20  
21

22 663

#### 22 664 **Mitochondrial genome assembly**

23  
24 665 Geneious (version 8.1.5) [102] was utilized with the default settings to assemble the  
25  
26 666 whole mitochondrial genome. First, the reads were mapped to the 4 available  
27  
28 667 *Syrmaticus* mitochondrial genomes from GenBank (AB164622.1 - AB164625.1). The  
29  
30 668 mapped reads were collected and then used for the further assembly of the  
31  
32  
33 669 mitochondrial genome of the Mikado pheasant. The genes were identified using  
34  
35 670 MITOS [103] and curated by comparison with known sequences of other long-tailed  
36  
37 671 pheasants from GenBank. The phylogenetic reconstruction and estimation of the  
38  
39 672 divergence times among the 5 long-tailed pheasants were achieved using BEAST with  
40  
41 673 the GTR+G model, which was selected as the best nucleotide substitution model by  
42  
43 674 Modeltest and PAUP\*. We added 2 nodes as the fossil calibration points according to  
44  
45 675 the TimeTree database, including Elliot's pheasant-Reeves's pheasant (11.1 Mya) and  
46  
47 676 Elliot's pheasant-Mrs. Hume's pheasant (0.2 Mya). A calibrated Yule speciation  
48  
49 677 process was implemented in the analysis using BEAST. In the Markov chain Monte  
50  
51 678 Carlo analysis, the chain length utilized 10 million generations.  
52  
53  
54  
55  
56  
57  
58  
59  
60  
61  
62  
63  
64  
65

1 680 **Additional files**

2  
3 681 Additional file 1: Supplementary figures S1-S12 and supplementary tables S1-S7, S9,  
4  
5 682 S12, and S15-S17.

6  
7 683 Additional file 2: Supplementary tables S8, S10-S11, and S13-S14.  
8  
9 684

10  
11  
12 685 **List of abbreviations**

13  
14 686 FDR: false discovery rate; GO: Gene Ontology; IUCN: International Union for  
15  
16 687 Conservation of Nature; LRT: likelihood ratio test; MHC: major histocompatibility  
17  
18 688 complex; Mya: million years ago; NR: non-redundant; PSG: positively selected gene.  
19  
20  
21 689

22  
23  
24  
25 690 **Availability of supporting data**

26  
27  
28  
29 691 Data for the *Syrmaticus mikado* genome has been deposited in the  
30  
31 692 GenBank/EMBL/DDBJ Bioproject database under the project number PRJNA389983.  
32  
33 693 Raw genomic and transcriptomic sequence datasets were deposited in the Sequence  
34  
35 694 Read Archive (SRA) under the accession number SRP10896. Other supporting data,  
36  
37 695 including the draft genome, annotations, alignments, phylogenetic trees and scripts  
38  
39 696 are available via the *GigaScience* repository, GigaDB [104].  
40  
41  
42 697

43  
44  
45 698 **Competing interests**

46  
47  
48 699 The authors declare that they have no competing interests.  
49  
50 700

51  
52  
53 701 **Funding**

54  
55 702 This work was supported by a grant from Taipei Zoo (No. 13, 2015 Animal Adoption  
56  
57 703 Programs of Taipei Zoo). The funder had no role in the design, collection, analysis, or  
58  
59  
60

1 704 interpretation of the data; writing the manuscript; or the decision to submit the  
2  
3 705 manuscript for publication.  
4

5 706

6  
7  
8 707 **Acknowledgements**  
9

10 708 We thank Dr. Mei-Yeh Lu and the High Throughput Genomics Core at the  
11  
12 709 Biodiversity Research Center, Academia Sinica, for the NGS library constructions  
13  
14 710 and Illumina sequencing. We are also grateful to the Computer and Information  
15  
16 711 Networking Center, National Taiwan University, and the National Center for  
17  
18 712 High-performance Computing for the support of the high-performance computing  
19  
20 713 facilities. We thank Dr. Chih-Ming Hung and Dr. Chen Siang Ng for discussion and  
21  
22 714 comments on the phylogenetic analysis, Dr. Chia-Yang Cheng and Tai-Rong Hong  
23  
24 715 for assistance in data analyses, Dr. Melissa Stauffer and Dr. Yao-Yin Chang for  
25  
26 716 assistance with editing the manuscript, and Yu-Cheng Hsieh for providing photos of  
27  
28 717 the Mikado pheasant.  
29  
30  
31  
32

33 718

34  
35  
36 719 **Ethics approval and consent to participate**  
37

38 720 All experimental procedures and sample collection methods in this study involving  
39  
40 721 Mikado pheasants were conducted according to the Wildlife Conservation Act  
41  
42 722 (amendment on July 8, 2009, Taiwan) and were approved by the Council of  
43  
44 723 Agriculture, Executive Yuan, Taipei, Taiwan with issue No. 1021700417.  
45  
46  
47

48 724

49  
50  
51 725 **Author Contributions**  
52

53 726 E.Y.C., C.-Y.C., M.-H.T., S.-T.D., and H.L. conceived the project. E.Y.C., C.-Y.C.,  
54  
55 727 M.-H.T., and E.-C.L. managed and coordinated the project. M.-H.T., S.-T.D., and  
56  
57 728 E.-C.L. performed animal work and prepared biological samples. T.-P.L. and L.-C.L.  
58  
59 729 designed bioinformatics and evolutionary analyses. C.-Y.L., P.-H.H., and K.-Y.L.  
60  
61

1 730 performed genome assembly. P.-H.H. performed assessment of the assembly quality.  
2  
3 731 C.-Y.L. and P.-H.H. performed gene prediction and annotation. C.-Y.L. and L.-M.C.  
4  
5 732 performed evolutionary analysis. C.-Y.L. performed mitochondrial genome assembly  
6  
7 733 and gene annotation, and curated the MHC-B gene loci. Y.-F.L. wrote a visualization  
8  
9 734 program for displaying MHC-B genes. C.-Y.L., P.-H.H., and A.C. wrote the  
10  
11 735 manuscript. A.C., M.-H.T., and C.-Y.C. commented on the draft and revised the  
12  
13 736 manuscript.  
14  
15 737 Mong-Hsun Tsai, Chien-Yu Chen, and Eric Y Chuang co-supervised the study.  
16  
17 738 All authors read and approved the final manuscript.  
18  
19  
20  
21  
22  
23  
24  
25  
26  
27  
28  
29  
30  
31  
32  
33  
34  
35  
36  
37  
38  
39  
40  
41  
42  
43  
44  
45  
46  
47  
48  
49  
50  
51  
52  
53  
54  
55  
56  
57  
58  
59  
60  
61  
62  
63  
64  
65

1 740 **References**

- 2  
3  
4 741 1. Bridgman CL. Habitat use, distribution and conservation status of the mikado  
5 742 pheasant (*Syrmticus mikado*) in Taiwan. The University of Tennessee; 2002.  
6  
7 743 2. Severinghaus SR. A study of the Swinhoe's and Mikado pheasants in Taiwan  
8 744 with recommendations for their conservation. Cornell University, May; 1977.  
9  
10 745 3. McGowan PJ and Garson PJ. Pheasants: status survey and conservation action  
11 746 plan 1995-1999. IUCN; 1995.  
12  
13 747 4. Fuller RA. Pheasants: status survey and conservation action plan 2000-2004.  
14 748 IUCN; 2000.  
15  
16 749 5. Yu L, Wang GD, Ruan J, Chen YB, Yang CP, Cao X, et al. Genomic analysis  
17 750 of snub-nosed monkeys (*Rhinopithecus*) identifies genes and processes related  
18 751 to high-altitude adaptation. *Nat Genet.* 2016;48 8:947-52.  
19 752 doi:10.1038/ng.3615.  
20  
21 753 6. Le Duc D, Renaud G, Krishnan A, Almen MS, Huynen L, Prohaska SJ, et al.  
22 754 Kiwi genome provides insights into evolution of a nocturnal lifestyle. *Genome*  
23 755 *biology.* 2015;16:147. doi:10.1186/s13059-015-0711-4.  
24  
25 756 7. Li S, Li B, Cheng C, Xiong Z, Liu Q, Lai J, et al. Genomic signatures of  
26 757 near-extinction and rebirth of the crested ibis and other endangered bird  
27 758 species. *Genome biology.* 2014;15 12:557. doi:10.1186/s13059-014-0557-1.  
28  
29 759 8. Hung CM, Shaner PJ, Zink RM, Liu WC, Chu TC, Huang WS, et al. Drastic  
30 760 population fluctuations explain the rapid extinction of the passenger pigeon.  
31 761 *Proceedings of the National Academy of Sciences of the United States of*  
32 762 *America.* 2014;111 29:10636-41. doi:10.1073/pnas.1401526111.  
33  
34 763 9. Qiu Q, Zhang G, Ma T, Qian W, Wang J, Ye Z, et al. The yak genome and  
35 764 adaptation to life at high altitude. *Nat Genet.* 2012;44 8:946-9.  
36 765 doi:10.1038/ng.2343.  
37  
38 766 10. Li R, Fan W, Tian G, Zhu H, He L, Cai J, et al. The sequence and de novo  
39 767 assembly of the giant panda genome. *Nature.* 2010;463 7279:311-7.  
40 768 doi:10.1038/nature08696.  
41  
42 769 11. Qu Y, Zhao H, Han N, Zhou G, Song G, Gao B, et al. Ground tit genome  
43 770 reveals avian adaptation to living at high altitudes in the Tibetan plateau. *Nat*  
44 771 *Commun.* 2013;4:2071. doi:10.1038/ncomms3071.  
45  
46 772 12. Zhan XJ and Zhang ZW. Molecular phylogeny of avian genus *Syrmticus*  
47 773 based on the mitochondrial cytochrome B gene and control region. *Zoolog Sci.*  
48 774 2005;22 4:427-35. doi:10.2108/zsj.22.427.  
49  
50 775 13. Lee P, Lue K, Hsieh J, Lee Y, Pan Y, Chen H, et al. A wildlife distribution  
51 776 database in Taiwan. Council of Agriculture, Taipei. 1998.

- 1  
2  
3  
4  
5  
6  
7  
8  
9  
10  
11  
12  
13  
14  
15  
16  
17  
18  
19  
20  
21  
22  
23  
24  
25  
26  
27  
28  
29  
30  
31  
32  
33  
34  
35  
36  
37  
38  
39  
40  
41  
42  
43  
44  
45  
46  
47  
48  
49  
50  
51  
52  
53  
54  
55  
56  
57  
58  
59  
60  
61  
62  
63  
64  
65
- 777 14. Chikhi R and Medvedev P. Informed and automated k-mer size selection for  
778 genome assembly. *Bioinformatics*. 2014;30 1:31-7.  
779 doi:10.1093/bioinformatics/btt310.
- 780 15. Zimin AV, Marcais G, Puiu D, Roberts M, Salzberg SL and Yorke JA. The  
781 MaSuRCA genome assembler. *Bioinformatics*. 2013;29 21:2669-77.  
782 doi:10.1093/bioinformatics/btt476.
- 783 16. Smit AF, Hubley R and Green P. RepeatMasker Open-3.0. 1996.
- 784 17. Stanke M, Diekhans M, Baertsch R and Haussler D. Using native and  
785 syntenically mapped cDNA alignments to improve de novo gene finding.  
786 *Bioinformatics*. 2008;24 5:637-44.
- 787 18. Haas BJ, Salzberg SL, Zhu W, Pertea M, Allen JE, Orvis J, et al. Automated  
788 eukaryotic gene structure annotation using EVIDENCEModeler and the Program  
789 to Assemble Spliced Alignments. *Genome biology*. 2008;9 1:R7.  
790 doi:10.1186/gb-2008-9-1-r7.
- 791 19. Zhang G, Li B, Li C, Gilbert MT, Jarvis ED, Wang J, et al. Comparative  
792 genomic data of the Avian Phylogenomics Project. *Gigascience*. 2014;3 1:26.  
793 doi:10.1186/2047-217X-3-26.
- 794 20. Lee C-Y, Chiu Y-C, Wang L-B, Kuo Y-L, Chuang EY, Lai L-C, et al.  
795 Common applications of next-generation sequencing technologies in genomic  
796 research. *Translational cancer research*. 2013;2 1:33-45.
- 797 21. Simao FA, Waterhouse RM, Ioannidis P, Kriventseva EV and Zdobnov EM.  
798 BUSCO: assessing genome assembly and annotation completeness with  
799 single-copy orthologs. *Bioinformatics*. 2015;31 19:3210-2.  
800 doi:10.1093/bioinformatics/btv351.
- 801 22. Kurtz S, Phillippy A, Delcher AL, Smoot M, Shumway M, Antonescu C, et al.  
802 Versatile and open software for comparing large genomes. *Genome biology*.  
803 2004;5 2:R12. doi:10.1186/gb-2004-5-2-r12.
- 804 23. Li L, Stoeckert CJ, Jr. and Roos DS. OrthoMCL: identification of ortholog  
805 groups for eukaryotic genomes. *Genome research*. 2003;13 9:2178-89.  
806 doi:10.1101/gr.1224503.
- 807 24. Drummond AJ, Suchard MA, Xie D and Rambaut A. Bayesian phylogenetics  
808 with BEAUti and the BEAST 1.7. *Mol Biol Evol*. 2012;29 8:1969-73.  
809 doi:10.1093/molbev/mss075.
- 810 25. Lu L, Chen Y, Wang Z, Li X, Chen W, Tao Z, et al. The goose genome  
811 sequence leads to insights into the evolution of waterfowl and susceptibility to  
812 fatty liver. *Genome biology*. 2015;16:89. doi:10.1186/s13059-015-0652-y.

- 1  
2  
3  
4  
5  
6  
7  
8  
9  
10  
11  
12  
13  
14  
15  
16  
17  
18  
19  
20  
21  
22  
23  
24  
25  
26  
27  
28  
29  
30  
31  
32  
33  
34  
35  
36  
37  
38  
39  
40  
41  
42  
43  
44  
45  
46  
47  
48  
49  
50  
51  
52  
53  
54  
55  
56  
57  
58  
59  
60  
61  
62  
63  
64  
65
- 813 26. Jiang L, Wang G, Peng R, Peng Q and Zou F. Phylogenetic and molecular  
814 dating analysis of Taiwan Blue Pheasant (*Lophura swinhoii*). *Gene*. 2014;539  
815 1:21-9. doi:10.1016/j.gene.2014.01.067.
- 816 27. Cai Q, Qian X, Lang Y, Luo Y, Xu J, Pan S, et al. Genome sequence of  
817 ground tit *Pseudopodoces humilis* and its adaptation to high altitude. *Genome*  
818 *biology*. 2013;14 3:R29. doi:10.1186/gb-2013-14-3-r29.
- 819 28. Finn RD, Mistry J, Tate J, Coghill P, Heger A, Pollington JE, et al. The Pfam  
820 protein families database. *Nucleic Acids Res*. 2010;38 Database  
821 issue:D211-22. doi:10.1093/nar/gkp985.
- 822 29. Wang B, Ekblom R, Strand TM, Portela-Bens S and Hoglund J. Sequencing of  
823 the core MHC region of black grouse (*Tetrao tetrix*) and comparative  
824 genomics of the galliform MHC. *BMC Genomics*. 2012;13:553.  
825 doi:10.1186/1471-2164-13-553.
- 826 30. Kaufman J, Milne S, Gobel TW, Walker BA, Jacob JP, Auffray C, et al. The  
827 chicken B locus is a minimal essential major histocompatibility complex.  
828 *Nature*. 1999;401 6756:923-5. doi:10.1038/44856.
- 829 31. Kaufman J, Volk H and Wallny HJ. A "minimal essential Mhc" and an  
830 "unrecognized Mhc": two extremes in selection for polymorphism. *Immunol*  
831 *Rev*. 1995;143:63-88.
- 832 32. Shiina T, Briles WE, Goto RM, Hosomichi K, Yanagiya K, Shimizu S, et al.  
833 Extended gene map reveals tripartite motif, C-type lectin, and Ig superfamily  
834 type genes within a subregion of the chicken MHC-B affecting infectious  
835 disease. *J Immunol*. 2007;178 11:7162-72.
- 836 33. Lee E, Helt GA, Reese JT, Munoz-Torres MC, Childers CP, Buels RM, et al.  
837 Web Apollo: a web-based genomic annotation editing platform. *Genome*  
838 *biology*. 2013;14 8:R93. doi:10.1186/gb-2013-14-8-r93.
- 839 34. Chaves LD, Krueth SB and Reed KM. Defining the turkey MHC: sequence  
840 and genes of the B locus. *J Immunol*. 2009;183 10:6530-7.  
841 doi:10.4049/jimmunol.0901310.
- 842 35. Emerman M and Malik HS. Paleovirology--modern consequences of ancient  
843 viruses. *PLoS Biol*. 2010;8 2:e1000301. doi:10.1371/journal.pbio.1000301.
- 844 36. Sawyer SL, Wu LI, Emerman M and Malik HS. Positive selection of primate  
845 TRIM5alpha identifies a critical species-specific retroviral restriction domain.  
846 *Proceedings of the National Academy of Sciences of the United States of*  
847 *America*. 2005;102 8:2832-7. doi:10.1073/pnas.0409853102.
- 848 37. Wang N, Kimball RT, Braun EL, Liang B and Zhang Z. Assessing  
849 phylogenetic relationships among galliformes: a multigene phylogeny with

- 1 850 expanded taxon sampling in Phasianidae. PLoS One. 2013;8 5:e64312.  
2 851 doi:10.1371/journal.pone.0064312.
- 3 852 38. Powell FL, Shams H, Hempleman SC and Mitchell GS. Breathing in thin air:  
4 853 acclimatization to altitude in ducks. *Respir Physiol Neurobiol.* 2004;144  
5 854 2-3:225-35. doi:10.1016/j.resp.2004.07.021.
- 6 855 39. Monge C and Leon-Velarde F. Physiological adaptation to high altitude:  
7 856 oxygen transport in mammals and birds. *Physiol Rev.* 1991;71 4:1135-72.
- 8 857 40. Weber RE, Jessen TH, Malte H and Tame J. Mutant hemoglobins (alpha  
9 858 119-Ala and beta 55-Ser): functions related to high-altitude respiration in  
10 859 geese. *J Appl Physiol* (1985). 1993;75 6:2646-55.
- 11 860 41. Jessen TH, Weber RE, Fermi G, Tame J and Braunitzer G. Adaptation of bird  
12 861 hemoglobins to high altitudes: demonstration of molecular mechanism by  
13 862 protein engineering. *Proceedings of the National Academy of Sciences of the*  
14 863 *United States of America.* 1991;88 15:6519-22.
- 15 864 42. McCracken KG, Barger CP and Sorenson MD. Phylogenetic and structural  
16 865 analysis of the HbA (alphaA/betaA) and HbD (alphaD/betaA) hemoglobin  
17 866 genes in two high-altitude waterfowl from the Himalayas and the Andes:  
18 867 Bar-headed goose (*Anser indicus*) and Andean goose (*Chloephaga*  
19 868 *melanoptera*). *Mol Phylogenet Evol.* 2010;56 2:649-58.  
20 869 doi:10.1016/j.ympev.2010.04.034.
- 21 870 43. Gnerre S, Maccallum I, Przybylski D, Ribeiro FJ, Burton JN, Walker BJ, et al.  
22 871 High-quality draft assemblies of mammalian genomes from massively parallel  
23 872 sequence data. *Proceedings of the National Academy of Sciences of the*  
24 873 *United States of America.* 2011;108 4:1513-8. doi:10.1073/pnas.1017351108.
- 25 874 44. Chu TC, Lu CH, Liu T, Lee GC, Li WH and Shih AC. Assembler for de novo  
26 875 assembly of large genomes. *Proceedings of the National Academy of Sciences*  
27 876 *of the United States of America.* 2013;110 36:E3417-24.  
28 877 doi:10.1073/pnas.1314090110.
- 29 878 45. Margulies M, Egholm M, Altman WE, Attiya S, Bader JS, Bemben LA, et al.  
30 879 Genome sequencing in microfabricated high-density picolitre reactors. *Nature.*  
31 880 2005;437 7057:376-80. doi:10.1038/nature03959.
- 32 881 46. Simpson JT and Durbin R. Efficient de novo assembly of large genomes using  
33 882 compressed data structures. *Genome research.* 2012;22 3:549-56.  
34 883 doi:10.1101/gr.126953.111.
- 35 884 47. Luo R, Liu B, Xie Y, Li Z, Huang W, Yuan J, et al. SOAPdenovo2: an  
36 885 empirically improved memory-efficient short-read de novo assembler.  
37 886 *Gigascience.* 2012;1 1:18. doi:10.1186/2047-217X-1-18.



- 1  
2  
3  
4  
5  
6  
7  
8  
9  
10  
11  
12  
13  
14  
15  
16  
17  
18  
19  
20  
21  
22  
23  
24  
25  
26  
27  
28  
29  
30  
31  
32  
33  
34  
35  
36  
37  
38  
39  
40  
41  
42  
43  
44  
45  
46  
47  
48  
49  
50  
51  
52  
53  
54  
55  
56  
57  
58  
59  
60  
61  
62  
63  
64  
65
- 887 48. Eo SH, Bininda-Emonds OR and Carroll JP. A phylogenetic supertree of the  
888 fowls (Galloanserae, Aves). *Zoologica Scripta*. 2009;38 5:465-81.
- 889 49. Kimball RT, Mary CM and Braun EL. A macroevolutionary perspective on  
890 multiple sexual traits in the phasianidae (galliformes). *Int J Evol Biol*.  
891 2011;2011:423938. doi:10.4061/2011/423938.
- 892 50. Dunn CW, Hejzol A, Matus DQ, Pang K, Browne WE, Smith SA, et al. Broad  
893 phylogenomic sampling improves resolution of the animal tree of life. *Nature*.  
894 2008;452 7188:745-9. doi:10.1038/nature06614.
- 895 51. Naylor GJ and Brown WM. Structural biology and phylogenetic estimation.  
896 *Nature*. 1997;388 6642:527-8. doi:10.1038/41460.
- 897 52. Rosenberg MS and Kumar S. Incomplete taxon sampling is not a problem for  
898 phylogenetic inference. *Proceedings of the National Academy of Sciences of*  
899 *the United States of America*. 2001;98 19:10751-6.  
900 doi:10.1073/pnas.191248498.
- 901 53. Li M, Tian S, Jin L, Zhou G, Li Y, Zhang Y, et al. Genomic analyses identify  
902 distinct patterns of selection in domesticated pigs and Tibetan wild boars. *Nat*  
903 *Genet*. 2013;45 12:1431-8. doi:10.1038/ng.2811.
- 904 54. Zhang B, Qiangba Y, Shang P, Wang Z, Ma J, Wang L, et al. A  
905 Comprehensive MicroRNA Expression Profile Related to Hypoxia Adaptation  
906 in the Tibetan Pig. *PLoS One*. 2015;10 11:e0143260.  
907 doi:10.1371/journal.pone.0143260.
- 908 55. Hsu F and Mao Y. The structure of phosphoinositide phosphatases: Insights  
909 into substrate specificity and catalysis. *Biochim Biophys Acta*. 2015;1851  
910 6:698-710. doi:10.1016/j.bbali.2014.09.015.
- 911 56. Rapoport SI, Primiani CT, Chen CT, Ahn K and Ryan VH. Coordinated  
912 Expression of Phosphoinositide Metabolic Genes during Development and  
913 Aging of Human Dorsolateral Prefrontal Cortex. *PLoS One*. 2015;10  
914 7:e0132675. doi:10.1371/journal.pone.0132675.
- 915 57. Tan J, Yu CY, Wang ZH, Chen HY, Guan J, Chen YX, et al. Genetic variants  
916 in the inositol phosphate metabolism pathway and risk of different types of  
917 cancer. *Sci Rep*. 2015;5:8473. doi:10.1038/srep08473.
- 918 58. Zhu L, Li M, Li X, Shuai S, Liu H, Wang J, et al. Distinct expression patterns  
919 of genes associated with muscle growth and adipose deposition in tibetan pigs:  
920 a possible adaptive mechanism for high altitude conditions. *High Alt Med Biol*.  
921 2009;10 1:45-55. doi:10.1089/ham.2008.1042.
- 922 59. Ullrich SE and Schmitt DA. The role of cytokines in UV-induced systemic  
923 immune suppression. *Journal of dermatological science*. 2000;23 Suppl  
924 1:S10-2.

- 1  
2  
3  
4  
5  
6  
7  
8  
9  
10  
11  
12  
13  
14  
15  
16  
17  
18  
19  
20  
21  
22  
23  
24  
25  
26  
27  
28  
29  
30  
31  
32  
33  
34  
35  
36  
37  
38  
39  
40  
41  
42  
43  
44  
45  
46  
47  
48  
49  
50  
51  
52  
53  
54  
55  
56  
57  
58  
59  
60  
61  
62  
63  
64  
65
- 925 60. Baadsgaard O, Fox DA and Cooper KD. Human epidermal cells from  
926 ultraviolet light-exposed skin preferentially activate autoreactive CD4+2H4+  
927 suppressor-inducer lymphocytes and CD8+ suppressor/cytotoxic lymphocytes.  
928 *J Immunol.* 1988;140 6:1738-44.
- 929 61. Dudley AC, Thomas D, Best J and Jenkins A. The STATs in cell stress-type  
930 responses. *Cell Commun Signal.* 2004;2 1:8. doi:10.1186/1478-811X-2-8.
- 931 62. Shuai K and Liu B. Regulation of JAK-STAT signalling in the immune  
932 system. *Nat Rev Immunol.* 2003;3 11:900-11. doi:10.1038/nri1226.
- 933 63. Stempien-Otero A, Karsan A, Cornejo CJ, Xiang H, Eunson T, Morrison RS,  
934 et al. Mechanisms of hypoxia-induced endothelial cell death. Role of p53 in  
935 apoptosis. *J Biol Chem.* 1999;274 12:8039-45.
- 936 64. Yang W, Qi Y, Lu B, Qiao L, Wu Y and Fu J. Gene expression variations in  
937 high-altitude adaptation: a case study of the Asiatic toad (*Bufo gargarizans*).  
938 *BMC Genet.* 2017;18 1:62. doi:10.1186/s12863-017-0529-z.
- 939 65. Storz JF and Cheviron ZA. Functional Genomic Insights into Regulatory  
940 Mechanisms of High-Altitude Adaptation. *Adv Exp Med Biol.*  
941 2016;903:113-28. doi:10.1007/978-1-4899-7678-9\_8.
- 942 66. Cheviron ZA and Brumfield RT. Genomic insights into adaptation to  
943 high-altitude environments. *Heredity (Edinb).* 2012;108 4:354-61.  
944 doi:10.1038/hdy.2011.85.
- 945 67. Bollmer JL, Vargas FH and Parker PG. Low MHC variation in the endangered  
946 Galapagos penguin (*Spheniscus mendiculus*). *Immunogenetics.* 2007;59  
947 7:593-602. doi:10.1007/s00251-007-0221-y.
- 948 68. Wan QH, Zhu L, Wu H and Fang SG. Major histocompatibility complex class  
949 II variation in the giant panda (*Ailuropoda melanoleuca*). *Mol Ecol.* 2006;15  
950 9:2441-50. doi:10.1111/j.1365-294X.2006.02966.x.
- 951 69. Zeng QQ, Zhong GH, He K, Sun DD and Wan QH. Molecular  
952 characterization of classical and nonclassical MHC class I genes from the  
953 golden pheasant (*Chrysolophus pictus*). *Int J Immunogenet.* 2016;43 1:8-17.  
954 doi:10.1111/iji.12245.
- 955 70. Kan XZ, Yang JK, Li XF, Chen L, Lei ZP, Wang M, et al. Phylogeny of major  
956 lineages of galliform birds (Aves: Galliformes) based on complete  
957 mitochondrial genomes. *Genet Mol Res.* 2010;9 3:1625-33.  
958 doi:10.4238/vol9-3gmr898.
- 959 71. Nishibori M, Shimogiri T, Hayashi T and Yasue H. Molecular evidence for  
960 hybridization of species in the genus *Gallus* except for *Gallus varius*. *Anim*  
961 *Genet.* 2005;36 5:367-75. doi:10.1111/j.1365-2052.2005.01318.x.

- 1  
2  
3  
4  
5  
6  
7  
8  
9  
10  
11  
12  
13  
14  
15  
16  
17  
18  
19  
20  
21  
22  
23  
24  
25  
26  
27  
28  
29  
30  
31  
32  
33  
34  
35  
36  
37  
38  
39  
40  
41  
42  
43  
44  
45  
46  
47  
48  
49  
50  
51  
52  
53  
54  
55  
56  
57  
58  
59  
60  
61  
62  
63  
64  
65
- 962 72. Liu T-K, Chen Y-G, Chen W-S and Jiang S-H. Rates of cooling and  
963 denudation of the Early Penglai Orogeny, Taiwan, as assessed by fission-track  
964 constraints. *Tectonophysics*. 2000;320 1:69-82.
- 965 73. Osozawa S, Shinjo R, Armid A, Watanabe Y, Horiguchi T and Wakabayashi J.  
966 Palaeogeographic reconstruction of the 1.55 Ma synchronous isolation of the  
967 Ryukyu Islands, Japan, and Taiwan and inflow of the Kuroshio warm current.  
968 *International Geology Review*. 2012;54 12:1369-88.
- 969 74. Boetzer M, Henkel CV, Jansen HJ, Butler D and Pirovano W. Scaffolding  
970 pre-assembled contigs using SSPACE. *Bioinformatics*. 2011;27 4:578-9.  
971 doi:10.1093/bioinformatics/btq683.
- 972 75. Gurevich A, Saveliev V, Vyahhi N and Tesler G. QUASt: quality assessment  
973 tool for genome assemblies. *Bioinformatics*. 2013;29 8:1072-5.  
974 doi:10.1093/bioinformatics/btt086.
- 975 76. Bolger AM, Lohse M and Usadel B. Trimmomatic: a flexible trimmer for  
976 Illumina sequence data. *Bioinformatics*. 2014;30 15:2114-20.  
977 doi:10.1093/bioinformatics/btu170.
- 978 77. Leggett RM, Clavijo BJ, Clissold L, Clark MD and Caccamo M. NextClip: an  
979 analysis and read preparation tool for Nextera Long Mate Pair libraries.  
980 *Bioinformatics*. 2014;30 4:566-8. doi:10.1093/bioinformatics/btt702.
- 981 78. Wood DE and Salzberg SL. Kraken: ultrafast metagenomic sequence  
982 classification using exact alignments. *Genome biology*. 2014;15 3:R46.  
983 doi:10.1186/gb-2014-15-3-r46.
- 984 79. Langmead B and Salzberg SL. Fast gapped-read alignment with Bowtie 2. *Nat*  
985 *Methods*. 2012;9 4:357-9. doi:10.1038/nmeth.1923.
- 986 80. Kim D, Pertea G, Trapnell C, Pimentel H, Kelley R and Salzberg SL. TopHat2:  
987 accurate alignment of transcriptomes in the presence of insertions, deletions  
988 and gene fusions. *Genome biology*. 2013;14 4:R36.  
989 doi:10.1186/gb-2013-14-4-r36.
- 990 81. Dobin A, Davis CA, Schlesinger F, Drenkow J, Zaleski C, Jha S, et al. STAR:  
991 ultrafast universal RNA-seq aligner. *Bioinformatics*. 2013;29 1:15-21.  
992 doi:10.1093/bioinformatics/bts635.
- 993 82. Quinlan AR and Hall IM. BEDTools: a flexible suite of utilities for comparing  
994 genomic features. *Bioinformatics*. 2010;26 6:841-2.  
995 doi:10.1093/bioinformatics/btq033.
- 996 83. Krzywinski M, Schein J, Birol I, Connors J, Gascoyne R, Horsman D, et al.  
997 Circos: an information aesthetic for comparative genomics. *Genome Res*.  
998 2009;19 9:1639-45. doi:10.1101/gr.092759.109.

1 999 84. Slater GS and Birney E. Automated generation of heuristics for biological  
2 1000 sequence comparison. *BMC Bioinformatics*. 2005;6:31.  
3 1001 doi:10.1186/1471-2105-6-31.  
4  
5 1002 85. Grabherr MG, Haas BJ, Yassour M, Levin JZ, Thompson DA, Amit I, et al.  
6 1003 Full-length transcriptome assembly from RNA-Seq data without a reference  
7 1004 genome. *Nature biotechnology*. 2011;29 7:644-52. doi:10.1038/nbt.1883.  
8  
9 1005 86. Haas BJ, Delcher AL, Mount SM, Wortman JR, Smith RK, Jr., Hannick LI, et  
10 1006 al. Improving the Arabidopsis genome annotation using maximal transcript  
11 1007 alignment assemblies. *Nucleic Acids Res*. 2003;31 19:5654-66.  
12  
13 1008 87. Eddy SR. Profile hidden Markov models. *Bioinformatics*. 1998;14 9:755-63.  
14  
15 1009 88. Holt C and Yandell M. MAKER2: an annotation pipeline and  
16 1010 genome-database management tool for second-generation genome projects.  
17 1011 *BMC Bioinformatics*. 2011;12:491. doi:10.1186/1471-2105-12-491.  
18  
19 1012 89. Edgar RC. MUSCLE: multiple sequence alignment with high accuracy and  
20 1013 high throughput. *Nucleic Acids Res*. 2004;32 5:1792-7.  
21 1014 doi:10.1093/nar/gkh340.  
22  
23 1015 90. Castresana J. Selection of conserved blocks from multiple alignments for their  
24 1016 use in phylogenetic analysis. *Mol Biol Evol*. 2000;17 4:540-52.  
25  
26 1017 91. Stamatakis A. RAxML version 8: a tool for phylogenetic analysis and  
27 1018 post-analysis of large phylogenies. *Bioinformatics*. 2014;30 9:1312-3.  
28 1019 doi:10.1093/bioinformatics/btu033.  
29  
30 1020 92. Posada D. Using MODELTEST and PAUP\* to select a model of nucleotide  
31 1021 substitution. *Current protocols in bioinformatics / editorial board, Andreas D*  
32 1022 *Baxevanis [et al]*. 2003;Chapter 6:Unit 6 5.  
33 1023 doi:10.1002/0471250953.bi0605s00.  
34  
35 1024 93. Hedges SB, Dudley J and Kumar S. TimeTree: a public knowledge-base of  
36 1025 divergence times among organisms. *Bioinformatics*. 2006;22 23:2971-2.  
37 1026 doi:10.1093/bioinformatics/btl505.  
38  
39 1027 94. Bell MA and Lloyd GT. Strap: an R package for plotting phylogenies against  
40 1028 stratigraphy and assessing their stratigraphic congruence. *Palaeontology*.  
41 1029 2015;58 2:379-89.  
42  
43 1030 95. Han MV, Thomas GW, Lugo-Martinez J and Hahn MW. Estimating gene gain  
44 1031 and loss rates in the presence of error in genome assembly and annotation  
45 1032 using CAFE 3. *Mol Biol Evol*. 2013;30 8:1987-97.  
46 1033 doi:10.1093/molbev/mst100.  
47  
48 1034 96. Yang Z. PAML 4: phylogenetic analysis by maximum likelihood. *Mol Biol*  
49 1035 *Evol*. 2007;24 8:1586-91. doi:10.1093/molbev/msm088.

1  
2  
3  
4  
5  
6  
7  
8  
9  
10  
11  
12  
13  
14  
15  
16  
17  
18  
19  
20  
21  
22  
23  
24  
25  
26  
27  
28  
29  
30  
31  
32  
33  
34  
35  
36  
37  
38  
39  
40  
41  
42  
43  
44  
45  
46  
47  
48  
49  
50  
51  
52  
53  
54  
55  
56  
57  
58  
59  
60  
61  
62  
63  
64  
65

1036 97. Bleazard T, Lamb JA and Griffiths-Jones S. Bias in microRNA functional  
1037 enrichment analysis. *Bioinformatics*. 2015;31 10:1592-8.  
1038 doi:10.1093/bioinformatics/btv023.

1039 98. Lu TP, Lee CY, Tsai MH, Chiu YC, Hsiao CK, Lai LC, et al. miRSystem: an  
1040 integrated system for characterizing enriched functions and pathways of  
1041 microRNA targets. *PLoS One*. 2012;7 8:e42390.  
1042 doi:10.1371/journal.pone.0042390.

1043 99. Bao J and Reecy JM. CateGORizer: a web-based program to batch analyze  
1044 gene ontology classification categories. *Online Journal of Bioinformatics*.  
1045 2008;9 2:108-12.

1046 100. Bindea G, Mlecnik B, Hackl H, Charoentong P, Tosolini M, Kirilovsky A, et  
1047 al. ClueGO: a Cytoscape plug-in to decipher functionally grouped gene  
1048 ontology and pathway annotation networks. *Bioinformatics*. 2009;25 8:1091-3.  
1049 doi:10.1093/bioinformatics/btp101.

1050 101. Kanehisa M and Goto S. KEGG: kyoto encyclopedia of genes and genomes.  
1051 *Nucleic Acids Res*. 2000;28 1:27-30.

1052 102. Kearse M, Moir R, Wilson A, Stones-Havas S, Cheung M, Sturrock S, et al.  
1053 Geneious Basic: an integrated and extendable desktop software platform for  
1054 the organization and analysis of sequence data. *Bioinformatics*. 2012;28  
1055 12:1647-9. doi:10.1093/bioinformatics/bts199.

1056 103. Bernt M, Donath A, Juhling F, Externbrink F, Florentz C, Fritzsche G, et al.  
1057 MITOS: improved de novo metazoan mitochondrial genome annotation. *Mol*  
1058 *Phylogenet Evol*. 2013;69 2:313-9. doi:10.1016/j.ympev.2012.08.023.

1059 104. Lee CY, Hsieh PH, Chiang LM, Chattopadhyay A, Li KY, Lee Y, et al.  
1060 Supporting data for "Whole-Genome De Novo Sequencing Reveals Unique  
1061 Genes that Contributed to the Adaptive Evolution of the Mikado Pheasant"  
1062 *GigaScience Database* 2018. <http://dx.doi.org/10.5524/100431>

1064 **Figure Legends**

1065 **Figure 1:** A chromosome-level comparison of the Mikado pheasant and the chicken.

1066 (A) A syntenic map of the Mikado pheasant and chicken genomes. The x-axis  
1067 specifies the chromosome position in the chicken, whereas the y-axis specifies the  
1068 scaffold position in the Mikado pheasant. The red dots (or lines) indicate that the  
1069 sequences were aligned in the same orientation, and the blue dots indicate an  
1070 alignment with a reverse complement. (B) A chord diagram of scaffolds with a total  
1071 length greater than 500 kb and an alignment length greater than 10 kb. The orange  
1072 perimeters specify the chromosomes (chr) of the chicken, whereas the purple  
1073 perimeters specify the scaffolds (sc) of the Mikado pheasant. The red links represent  
1074 the sequences aligned in the same orientation, and the blue links represent an  
1075 alignment with a reverse complement. Arrows colored in yellow indicate the scaffolds  
1076 that were fully aligned, and grey ones indicate the multiple alignment.

1077  
1078 **Figure 2:** Evolution of gene families among various animal species. A phylogenetic  
1079 tree was reconstructed based on 5287 single-copy orthologs of 10 species. The most  
1080 recent common ancestor (MRCA) contains 18 220 gene families that were used to  
1081 examine gene families with expansions or contractions. The numbers of gene families  
1082 with significant expansions and contractions are shown in red and blue, respectively,  
1083 at each branch. The divergence times and associated 95% confidence intervals (in  
1084 parentheses) are indicated at the nodes of the tree in Mya. All nodes had 100%  
1085 support in 500 bootstrap replicates.

1086  
1087 **Figure 3:** An identity plot of the MHC regions of the Mikado pheasant and the  
1088 chicken. The chicken MHC sequence was downloaded from GenBank (AB268588).

1 1089 Its nucleotide sequence from 17 978 to 241 251 was aligned against the Mikado  
2  
3 1090 pheasant MHC sequence from 2615 to 229 500 in scaffold208. The gene structure  
4  
5 1091 boxes on the horizontal and vertical axes, respectively, represent the gene loci in the  
6  
7 1092 Mikado pheasant and the chicken. Boxes with different sizes exhibit different gene  
8  
9 1093 locus sizes, and red/blue coloring indicates genes in forward/reverse orientation. The  
10  
11 1094 red dots (or lines) on the diagonal indicate that the sequences were aligned in the  
12  
13 1095 same orientation, whereas the blue dots indicate alignments with reverse complements.  
14  
15 1096 The green dotted lines highlight the sequence of the inverted *TAPBP* locus and  
16  
17 1097 *TAP1-TAP2* block. The orange peaks show the read counts on a natural log scale of  
18  
19 1098 the gene expression based on our RNA-Seq data. The box plot colored in purple  
20  
21 1099 indicates  $d_N/d_S$  ratios of genes.  
22  
23  
24  
25  
26

27 1100

28  
29 1101 **Figure 4:** A phylogenetic tree of *Syrmaticus* pheasants. The divergence times and  
30  
31 1102 associated 95% confidence intervals shown in parentheses are given at the branch  
32  
33 1103 nodes of the tree in Mya.  
34  
35

36 1104

1105 **Tables**

**Table 1:** DNA contigs and scaffolds from the genomic data of the Mikado pheasant.

|                      | <b>Contigs</b> | <b>Scaffolds</b> |
|----------------------|----------------|------------------|
| Total length         | 1 054 607 905  | 1 035 947 982    |
| Maximum length       | 195 342        | 50 275 205       |
| Number of Ns         | 0              | 19 577 473       |
| Average length       | 5050           | 110 714          |
| N50*                 | 13 461         | 11 461 115       |
| N75*                 | 6528           | 5 708 287        |
| L50 <sup>†</sup>     | 22 195         | 28               |
| L75 <sup>†</sup>     | 50 081         | 59               |
| Counts $\geq$ 300 bp | 208 810        | -                |
| Counts $\geq$ 1 kb   | 123 006        | 9357             |
| Counts $\geq$ 5 kb   | 61 237         | 1489             |
| Counts $\geq$ 10 kb  | 32 868         | 928              |

\* The N50/N75 length is defined as the shortest sequence length at 50%/75% of the genome.

<sup>†</sup> The L50/L75 count is defined as the smallest number of contigs (or scaffolds) that those length sum produces N50/N75.

Values of the genome assembly were calculated using the contigs  $\geq$ 300 bp and scaffolds  $\geq$ 1000 bp.

1106



**Table 2:** Coding sequences of MHC-B genes in the Mikado pheasant and comparisons with the chicken.

| Gene     | Position      | Strand | Gene length | Amino acid length | Exon | Aligned base | Nucleotide identity (%) | Aligned amino acid | Amino acid identity (%) | Amino acid substitutions | d <sub>N</sub> /d <sub>S</sub> * |
|----------|---------------|--------|-------------|-------------------|------|--------------|-------------------------|--------------------|-------------------------|--------------------------|----------------------------------|
| KIF51    | 2615-5304     | +      | 1140        | 380               | 7    | 1131         | 91.76                   | 377                | 90.53                   | 33                       | 0.8669                           |
| Blec3    | 8997-11221    | -      | 552         | 183               | 5    | 507          | 82.43                   | 168                | 78.14                   | 25                       | 0.3821                           |
| Bzfp3    | 12126-18213   | +      | 1449        | 482               | 13   | 1569         | 85.8                    | 522                | 83.62                   | 40                       | 0.1884                           |
| TRIM7.2  | 19507-24562   | -      | 1518        | 505               | 7    | 1518         | 95.98                   | 505                | 98.61                   | 7                        | 0.0391                           |
| Bzfp2*   | 27027-29946   | +      | 1368        | 455               | 4    | 1396         | 70.41                   | N/A                | N/A                     | N/A                      | 0.2438                           |
| Bzfp1    | 31049-33298   | -      | 1425        | 474               | 2    | 1426         | 88.23                   | 471                | 86.79                   | 54                       | 0.1900                           |
| 44C24.1  | 37266-37673   | -      | 408         | 136               | 1    | 408          | 85.78                   | 136                | 80.15                   | 27                       | 0.2762                           |
| IL15     | 42730-46759   | +      | 1578        | 525               | 6    | 1572         | 92.25                   | 523                | 93.75                   | 25                       | 0.1011                           |
| TRIM7.1  | 51325-62131   | -      | 1758        | 585               | 8    | 1767         | 92.49                   | 588                | 92.69                   | 40                       | 0.1545                           |
| HER1     | 63362-64247   | -      | 324         | 107               | 3    | 324          | 93.52                   | 107                | 91.59                   | 9                        | 0.2148                           |
| TRIM39.2 | 70980-74640   | -      | 1392        | 464               | 6    | 1389         | 93.68                   | 463                | 94.61                   | 24                       | 0.1167                           |
| TRIM27.2 | 76988-80522   | +      | 1431        | 476               | 7    | 1431         | 94.13                   | 476                | 92.23                   | 37                       | 0.2415                           |
| TRIM39.1 | 81560-85449   | -      | 798         | 266               | 5    | 798          | 93.23                   | 266                | 91.35                   | 23                       | 0.2753                           |
| TRIM27.1 | 86518-90228   | -      | 1485        | 495               | 7    | 1485         | 94.48                   | 495                | 94.34                   | 28                       | 0.1715                           |
| TRIM41   | 91918-96605   | +      | 1656        | 551               | 7    | 1770         | 89.58                   | 589                | 91.71                   | 7                        | 0.0375                           |
| GNB2L1   | 98038-101512  | -      | 954         | 317               | 8    | 954          | 96.86                   | 317                | 100                     | 0                        | N/A                              |
| BFN1     | 103411-114264 | +      | 930         | 309               | 8    | 939          | 74.64                   | 339                | 57.26                   | 96                       | 0.8357                           |
| BFN2     | 117466-120157 | +      | 1461        | 487               | 7    | 1481         | 90.41                   | 469                | 83.37                   | 52                       | 0.3996                           |
| BG1      | 124105-125436 | -      | 549         | 183               | 3    | 546          | 91.99                   | 182                | 87.98                   | 21                       | 0.5591                           |
| B32      | 131358-133021 | -      | 579         | 192               | 5    | 579          | 86.32                   | 190                | 71.88                   | 52                       | 0.9375                           |
| Blec1    | 135818-137846 | +      | 567         | 188               | 5    | 567          | 92.59                   | 188                | 88.3                    | 22                       | 0.4683                           |
| B35      | 138411-139729 | -      | 339         | 112               | 3    | 345          | 83.38                   | 113                | 42.98                   | 62                       | 0.7904                           |
| TAPBP    | 140657-144216 | +      | 1293        | 430               | 8    | 1293         | 92.19                   | 430                | 89.77                   | 44                       | 0.3179                           |
| B38*     | N/A           | N/A    | 792         | 263               | N/A  | 792          | 92.93                   | 263                | 85.93                   | 37                       | 1.4489                           |
| BRD2     | 150146-156295 | -      | 2976        | 991               | 13   | 3078         | 86.85                   | 776                | 75.28                   | 30                       | 0.0306                           |
| DMA      | 160545-162778 | +      | 789         | 263               | 4    | 789          | 92.65                   | 263                | 89.73                   | 27                       | 0.4528                           |
| DMA1     | 163010-165184 | +      | 930         | 310               | 6    | 930          | 91.29                   | 310                | 86.45                   | 42                       | 0.4978                           |
| DMA2     | 165617-168363 | +      | 768         | 256               | 5    | 768          | 92.71                   | 256                | 92.58                   | 19                       | 0.1622                           |
| B45      | 169254-170740 | +      | 996         | 331               | 5    | 1001         | 83.66                   | 345                | 64.12                   | 95                       | 0.7116                           |
| TAP2     | 172793-176021 | -      | 2100        | 700               | 9    | 2100         | 92.48                   | 700                | 93.14                   | 48                       | 0.1675                           |
| TAP3     | 176574-180981 | +      | 1752        | 584               | 11   | 1739         | 93.21                   | 580                | 92.81                   | 38                       | 0.2191                           |
| BE2      | 181900-184038 | -      | 1530        | 509               | 6    | 1213         | 62.28                   | 326                | 57.39                   | 119                      | 0.8157                           |
| C51      | 185102-199258 | +      | 5031        | 1676              | 40   | 4998         | 93.33                   | 1665               | 93.2                    | 101                      | 0.1974                           |
| CompA    | 199593-200795 | +      | 396         | 131               | 4    | 396          | 96.72                   | 131                | 99.24                   | 1                        | 0.0324                           |
| CY21     | 201291-205141 | +      | 1431        | 477               | 11   | 1431         | 92.67                   | 477                | 94.13                   | 28                       | 0.7109                           |
| TNFB     | 209524-215604 | -      | 2472        | 824               | 10   | 2496         | 92.14                   | 832                | 92.34                   | 50                       | 0.2002                           |
| LTPAR1   | 221450-222538 | +      | 1089        | 363               | 1    | 1089         | 94.12                   | 363                | 94.49                   | 20                       | 0.1954                           |
| C5A2     | 223740-225788 | -      | 1044        | 348               | 6    | 1044         | 92.24                   | 348                | 87.93                   | 42                       | 0.3796                           |
| CD1A1    | 227030-229500 | -      | 1122        | 374               | 6    | 1122         | 93.4                    | 374                | 90.64                   | 35                       | 0.3294                           |

KIFC1, kinesin family member C1; Blec, C-type lectin-like receptor; Bzfp, B-locus zinc finger-like protein; TRIM, tripartite motif containing protein; 44G24.1, histone H2B-like protein; IL4I1, interleukin 4 induced 1; HEP21, hen egg protein 21 kDa; GNB2L1, guanine nucleotide binding-like protein; BTN, B-butyrophilin protein; BG1, BG-like antigen; CD1A1/A2, CD1-like proteins

\*  $d_N/d_S$  = ratio of nonsynonymous ( $d_N$ ) to synonymous ( $d_S$ ) substitutions.

† Defined as a pseudogene in chicken.

‡ Not predicted result was identified from the DNA assembly. The transcript sequence was alternatively derived from the transcriptome assembly by RNA-Seq.

5  
6  
7  
8  
9  
10  
11  
12  
13  
14  
15  
16  
17  
18  
19  
20  
21  
22  
23  
24  
25  
26  
27  
28  
29  
30  
31  
32  
33  
34  
35  
36  
37  
38  
39  
40  
41  
42  
43  
44  
45  
46  
47  
48  
49  
50  
51  
52  
53  
54  
55  
56  
57  
58  
59  
60  
61  
62  
63  
64  
65

1107

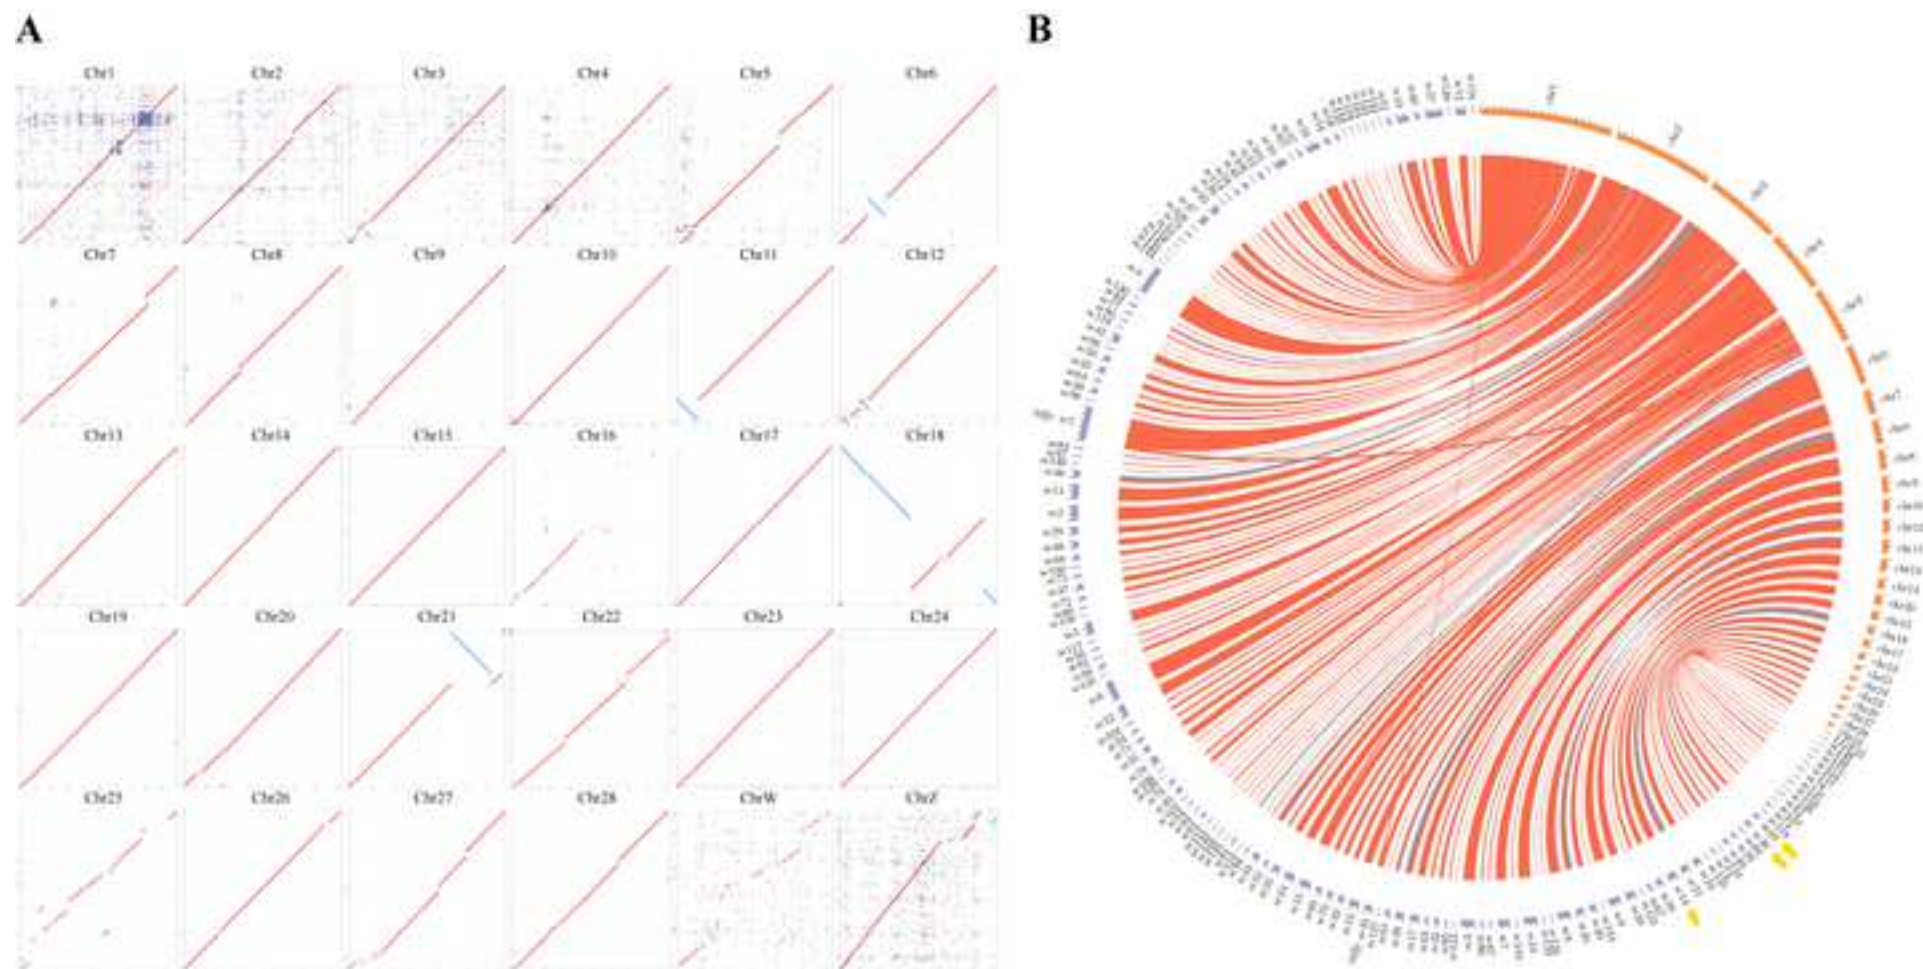

Figure 2

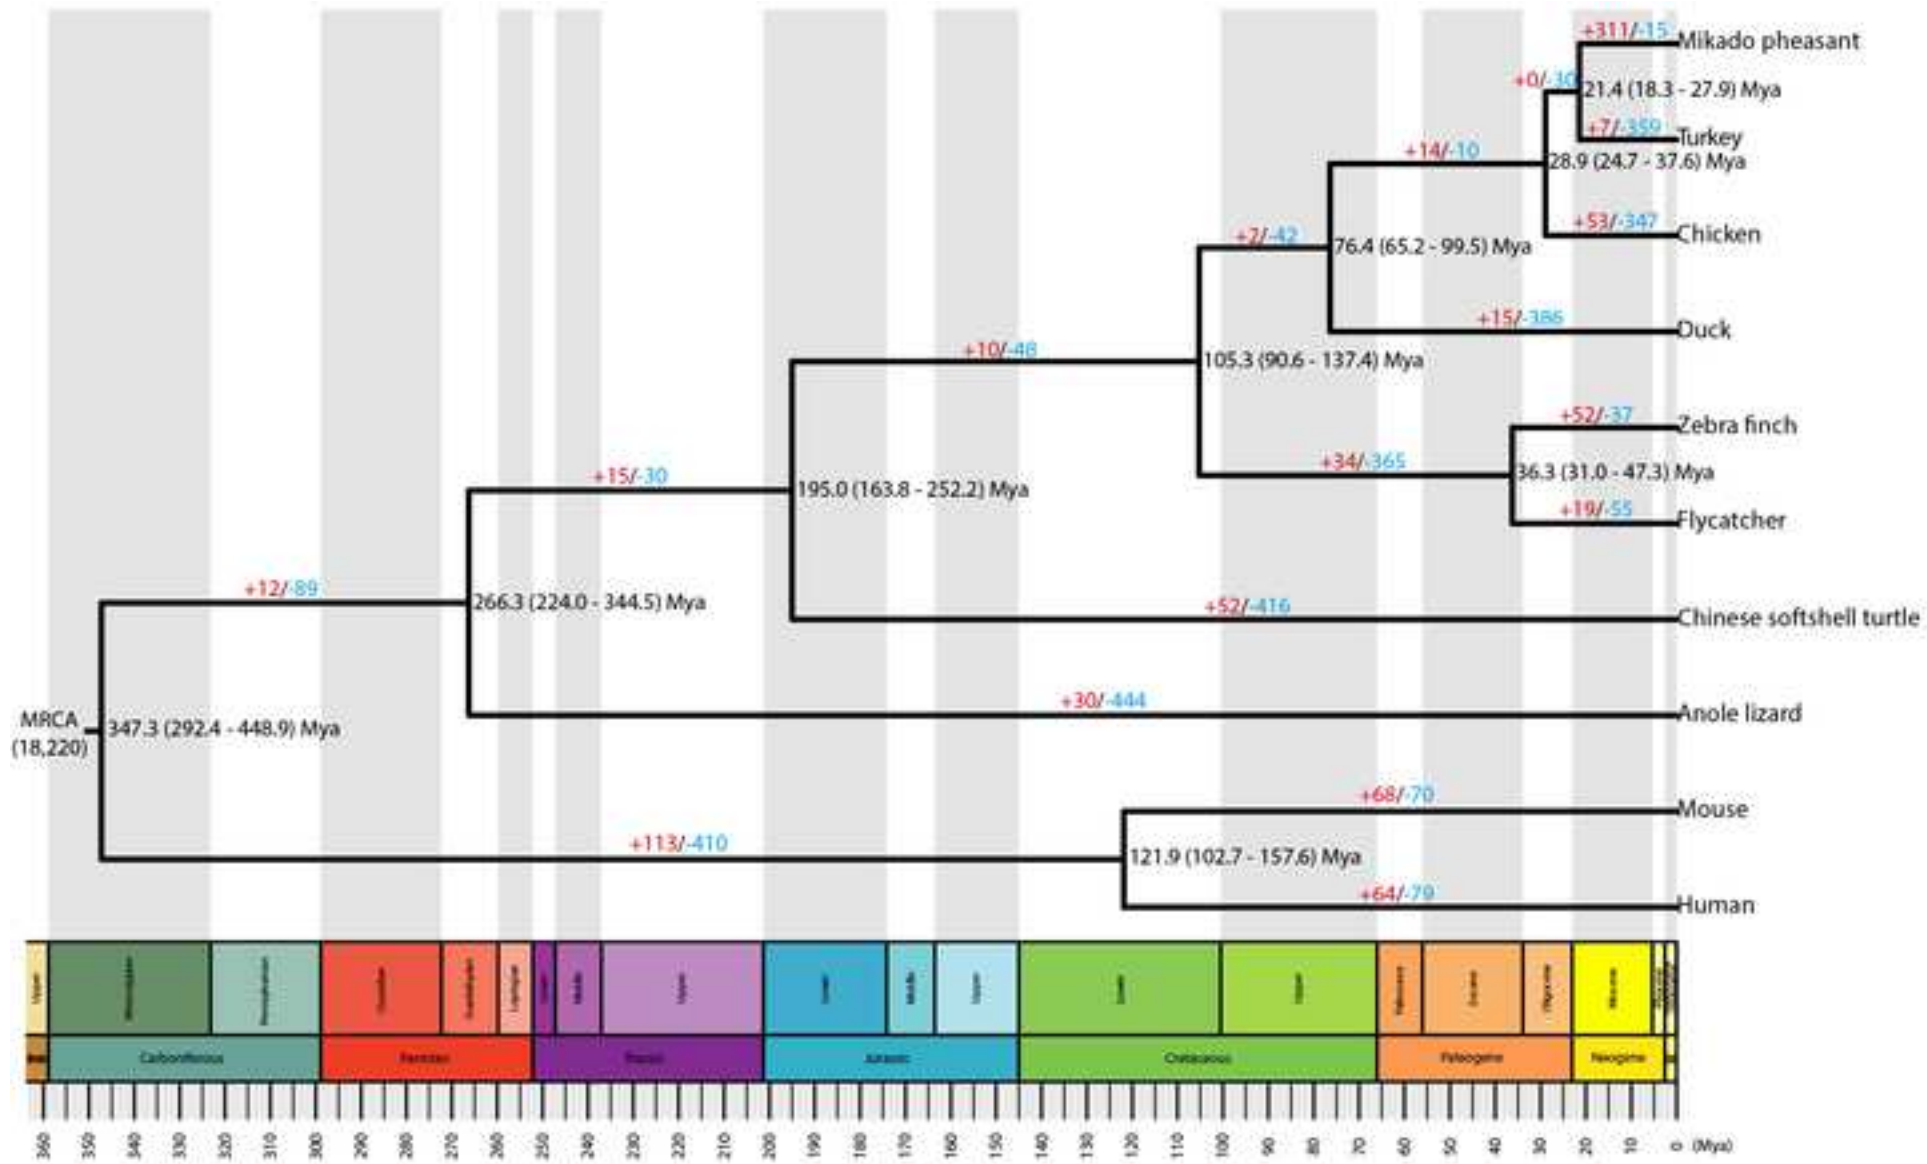



Figure 4

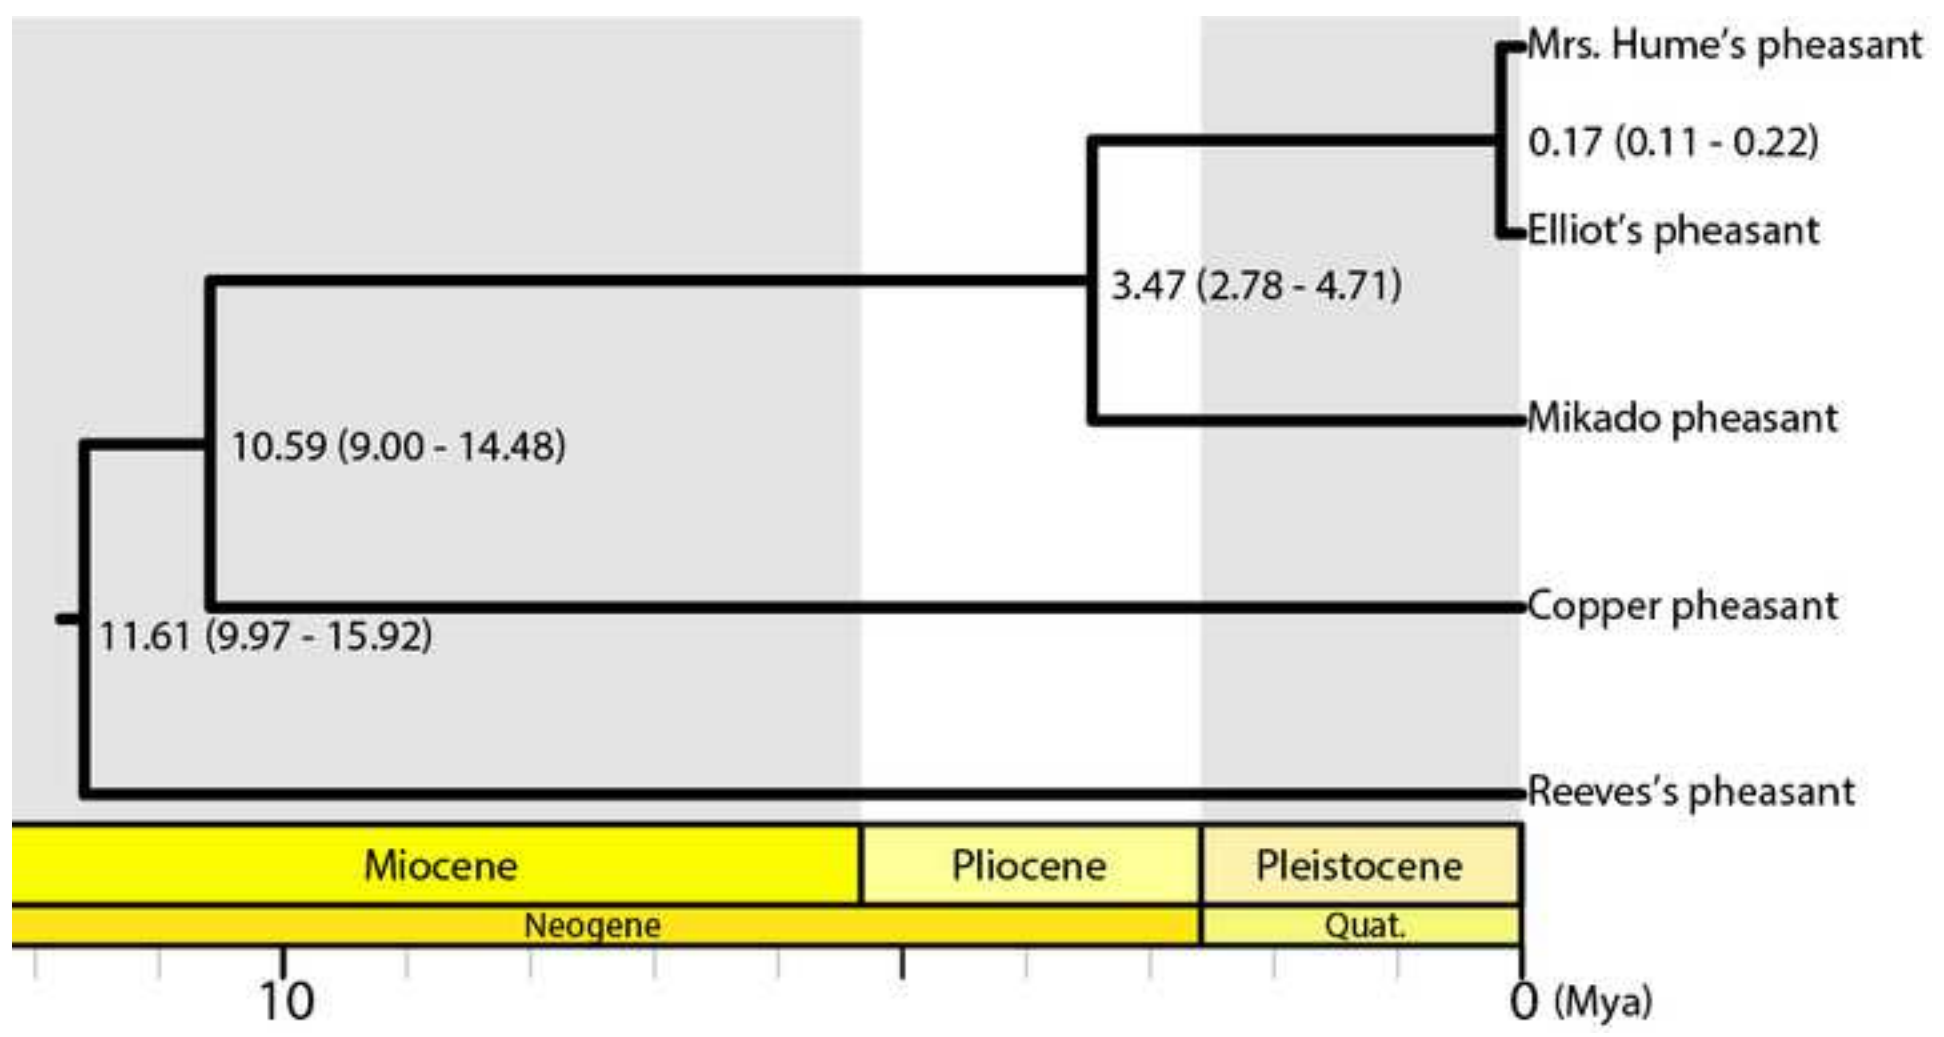

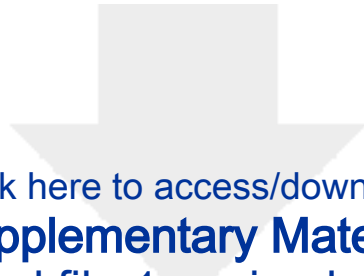

Click here to access/download  
**Supplementary Material**  
Additional file 1\_revised\_ver.docx

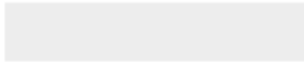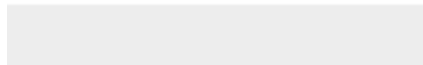

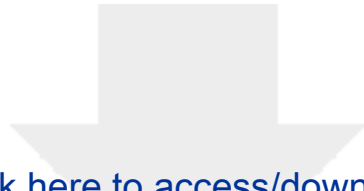

Click here to access/download  
**Supplementary Material**  
Additional file 2\_revised\_ver.xlsx

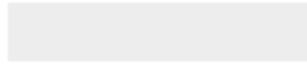

Supplement: giy044_giga-d-17-00220_revision_1.pdf [file giy044_giga-d-17-00220_revision_1.pdf]
