# Supplementary material for: Whole-genome de novo sequencing reveals unique genes that contributed to the adaptive evolution of the Mikado pheasant
Source: PubMed Central journal article supplement (PMC5941149; doi:10.1093/gigascience/giy044), 2018-05-02
Supplement: giy044_giga-d-17-00220_original_submission.pdf [file giy044_giga-d-17-00220_original_submission.pdf]

## Whole-Genome De Novo Sequencing Reveals Unique Genes that Contributed to the Adaptive Evolution of the Mikado Pheasant --Manuscript Draft--

|                                                      |                                                                                                                                                                                                                                                                                                                                                                                                                                                                                                                                                                                                                                                                                                                                                                                                                                                                                                                                                                                                                                                                                                                                                                                                                                                                                                                                                                                                                                                                                                                                                                                                                                                                |                    |
|------------------------------------------------------|----------------------------------------------------------------------------------------------------------------------------------------------------------------------------------------------------------------------------------------------------------------------------------------------------------------------------------------------------------------------------------------------------------------------------------------------------------------------------------------------------------------------------------------------------------------------------------------------------------------------------------------------------------------------------------------------------------------------------------------------------------------------------------------------------------------------------------------------------------------------------------------------------------------------------------------------------------------------------------------------------------------------------------------------------------------------------------------------------------------------------------------------------------------------------------------------------------------------------------------------------------------------------------------------------------------------------------------------------------------------------------------------------------------------------------------------------------------------------------------------------------------------------------------------------------------------------------------------------------------------------------------------------------------|--------------------|
| <b>Manuscript Number:</b>                            | GIGA-D-17-00220                                                                                                                                                                                                                                                                                                                                                                                                                                                                                                                                                                                                                                                                                                                                                                                                                                                                                                                                                                                                                                                                                                                                                                                                                                                                                                                                                                                                                                                                                                                                                                                                                                                |                    |
| <b>Full Title:</b>                                   | Whole-Genome De Novo Sequencing Reveals Unique Genes that Contributed to the Adaptive Evolution of the Mikado Pheasant                                                                                                                                                                                                                                                                                                                                                                                                                                                                                                                                                                                                                                                                                                                                                                                                                                                                                                                                                                                                                                                                                                                                                                                                                                                                                                                                                                                                                                                                                                                                         |                    |
| <b>Article Type:</b>                                 | Research                                                                                                                                                                                                                                                                                                                                                                                                                                                                                                                                                                                                                                                                                                                                                                                                                                                                                                                                                                                                                                                                                                                                                                                                                                                                                                                                                                                                                                                                                                                                                                                                                                                       |                    |
| <b>Funding Information:</b>                          | Taipei Zoo<br>(No. 13, 2015 Animal Adoption Programs<br>of Taipei Zoo)                                                                                                                                                                                                                                                                                                                                                                                                                                                                                                                                                                                                                                                                                                                                                                                                                                                                                                                                                                                                                                                                                                                                                                                                                                                                                                                                                                                                                                                                                                                                                                                         | Dr. Eric Y. Chuang |
| <b>Abstract:</b>                                     | <p><b>Background:</b> The Mikado pheasant (<i>Syrnaticus mikado</i>) is a nearly endangered species indigenous to high-altitude regions of Taiwan. It possesses a unique position in evolution because of its geographic isolation. Currently, the genetic background and adaptive behaviors of the Mikado pheasant remain unclear.</p> <p><b>Results:</b> We present the draft genome of the Mikado pheasant, which consists of 1.04 Gb of DNA and 15 972 annotated protein-coding genes. The Mikado pheasant displays expansion and positive selection of genes related to features that contribute to its adaptive evolution, such as energy metabolism, oxygen transport, hemoglobin binding, radiation response, immune response, and DNA repair. The major histocompatibility complex (MHC) region contains 39 putative genes within 227 kb of DNA. Compared with the chicken MHC, we not only found that TAPBP and the TAP1-TAP2 block are in inverse orientation, but also identified some genes undergoing rapid evolution. The complete mitochondrial genome was further sequenced, assembled, and compared against 4 other long-tailed pheasants. The results from molecular clock analysis suggest that ancestors of the Mikado pheasant migrated from the north to Taiwan about 3.47 million years ago.</p> <p><b>Conclusions:</b> This study provides a valuable genomic resource for the Mikado pheasant, insights into its adaptation to high altitude, and the evolutionary history of the genus <i>Syrnaticus</i>, which could potentially be useful for future studies investigating molecular evolution, genomics, and immunogenetics.</p> |                    |
| <b>Corresponding Author:</b>                         | Eric Y. Chuang<br><br>TAIWAN                                                                                                                                                                                                                                                                                                                                                                                                                                                                                                                                                                                                                                                                                                                                                                                                                                                                                                                                                                                                                                                                                                                                                                                                                                                                                                                                                                                                                                                                                                                                                                                                                                   |                    |
| <b>Corresponding Author Secondary Information:</b>   |                                                                                                                                                                                                                                                                                                                                                                                                                                                                                                                                                                                                                                                                                                                                                                                                                                                                                                                                                                                                                                                                                                                                                                                                                                                                                                                                                                                                                                                                                                                                                                                                                                                                |                    |
| <b>Corresponding Author's Institution:</b>           |                                                                                                                                                                                                                                                                                                                                                                                                                                                                                                                                                                                                                                                                                                                                                                                                                                                                                                                                                                                                                                                                                                                                                                                                                                                                                                                                                                                                                                                                                                                                                                                                                                                                |                    |
| <b>Corresponding Author's Secondary Institution:</b> |                                                                                                                                                                                                                                                                                                                                                                                                                                                                                                                                                                                                                                                                                                                                                                                                                                                                                                                                                                                                                                                                                                                                                                                                                                                                                                                                                                                                                                                                                                                                                                                                                                                                |                    |
| <b>First Author:</b>                                 | Chien-Yueh Lee                                                                                                                                                                                                                                                                                                                                                                                                                                                                                                                                                                                                                                                                                                                                                                                                                                                                                                                                                                                                                                                                                                                                                                                                                                                                                                                                                                                                                                                                                                                                                                                                                                                 |                    |
| <b>First Author Secondary Information:</b>           |                                                                                                                                                                                                                                                                                                                                                                                                                                                                                                                                                                                                                                                                                                                                                                                                                                                                                                                                                                                                                                                                                                                                                                                                                                                                                                                                                                                                                                                                                                                                                                                                                                                                |                    |
| <b>Order of Authors:</b>                             | Chien-Yueh Lee                                                                                                                                                                                                                                                                                                                                                                                                                                                                                                                                                                                                                                                                                                                                                                                                                                                                                                                                                                                                                                                                                                                                                                                                                                                                                                                                                                                                                                                                                                                                                                                                                                                 |                    |
|                                                      | Ping-Han Hsieh                                                                                                                                                                                                                                                                                                                                                                                                                                                                                                                                                                                                                                                                                                                                                                                                                                                                                                                                                                                                                                                                                                                                                                                                                                                                                                                                                                                                                                                                                                                                                                                                                                                 |                    |
|                                                      | Li-Mei Chiang                                                                                                                                                                                                                                                                                                                                                                                                                                                                                                                                                                                                                                                                                                                                                                                                                                                                                                                                                                                                                                                                                                                                                                                                                                                                                                                                                                                                                                                                                                                                                                                                                                                  |                    |
|                                                      | Amrita Chattopadhyay                                                                                                                                                                                                                                                                                                                                                                                                                                                                                                                                                                                                                                                                                                                                                                                                                                                                                                                                                                                                                                                                                                                                                                                                                                                                                                                                                                                                                                                                                                                                                                                                                                           |                    |
|                                                      | Kuan-Yi Li                                                                                                                                                                                                                                                                                                                                                                                                                                                                                                                                                                                                                                                                                                                                                                                                                                                                                                                                                                                                                                                                                                                                                                                                                                                                                                                                                                                                                                                                                                                                                                                                                                                     |                    |
|                                                      | Yi-Fang Lee                                                                                                                                                                                                                                                                                                                                                                                                                                                                                                                                                                                                                                                                                                                                                                                                                                                                                                                                                                                                                                                                                                                                                                                                                                                                                                                                                                                                                                                                                                                                                                                                                                                    |                    |
|                                                      | Tzu-Pin Lu                                                                                                                                                                                                                                                                                                                                                                                                                                                                                                                                                                                                                                                                                                                                                                                                                                                                                                                                                                                                                                                                                                                                                                                                                                                                                                                                                                                                                                                                                                                                                                                                                                                     |                    |
|                                                      | Liang-Chuan Lai                                                                                                                                                                                                                                                                                                                                                                                                                                                                                                                                                                                                                                                                                                                                                                                                                                                                                                                                                                                                                                                                                                                                                                                                                                                                                                                                                                                                                                                                                                                                                                                                                                                |                    |
|                                                      | En-Chung Lin                                                                                                                                                                                                                                                                                                                                                                                                                                                                                                                                                                                                                                                                                                                                                                                                                                                                                                                                                                                                                                                                                                                                                                                                                                                                                                                                                                                                                                                                                                                                                                                                                                                   |                    |

|                                                                                                                                                                                                                                                                                                                                                                                                                                                                                                                                     |                 |
|-------------------------------------------------------------------------------------------------------------------------------------------------------------------------------------------------------------------------------------------------------------------------------------------------------------------------------------------------------------------------------------------------------------------------------------------------------------------------------------------------------------------------------------|-----------------|
|                                                                                                                                                                                                                                                                                                                                                                                                                                                                                                                                     | Hsinyu Lee      |
|                                                                                                                                                                                                                                                                                                                                                                                                                                                                                                                                     | Shih-Torng Ding |
|                                                                                                                                                                                                                                                                                                                                                                                                                                                                                                                                     | Mong-Hsun Tsai  |
|                                                                                                                                                                                                                                                                                                                                                                                                                                                                                                                                     | Chien-Yu Chen   |
|                                                                                                                                                                                                                                                                                                                                                                                                                                                                                                                                     | Eric Y. Chuang  |
| <b>Order of Authors Secondary Information:</b>                                                                                                                                                                                                                                                                                                                                                                                                                                                                                      |                 |
| <b>Opposed Reviewers:</b>                                                                                                                                                                                                                                                                                                                                                                                                                                                                                                           |                 |
| <b>Additional Information:</b>                                                                                                                                                                                                                                                                                                                                                                                                                                                                                                      |                 |
| <b>Question</b>                                                                                                                                                                                                                                                                                                                                                                                                                                                                                                                     | <b>Response</b> |
| Are you submitting this manuscript to a special series or article collection?                                                                                                                                                                                                                                                                                                                                                                                                                                                       | No              |
| <p><b>Experimental design and statistics</b></p> <p>Full details of the experimental design and statistical methods used should be given in the Methods section, as detailed in our <a href="#">Minimum Standards Reporting Checklist</a>. Information essential to interpreting the data presented should be made available in the figure legends.</p> <p>Have you included all the information requested in your manuscript?</p>                                                                                                  | Yes             |
| <p><b>Resources</b></p> <p>A description of all resources used, including antibodies, cell lines, animals and software tools, with enough information to allow them to be uniquely identified, should be included in the Methods section. Authors are strongly encouraged to cite <a href="#">Research Resource Identifiers</a> (RRIDs) for antibodies, model organisms and tools, where possible.</p> <p>Have you included the information requested as detailed in our <a href="#">Minimum Standards Reporting Checklist</a>?</p> | Yes             |
| <p><b>Availability of data and materials</b></p> <p>All datasets and code on which the conclusions of the paper rely must be either included in your submission or deposited in <a href="#">publicly available repositories</a> (where available and ethically appropriate), referencing such data using a unique identifier in the references and in the “Availability of Data and Materials”</p>                                                                                                                                  | Yes             |

section of your manuscript.

Have you have met the above requirement as detailed in our [Minimum Standards Reporting Checklist](#)?

# 1 **Whole-Genome *De Novo* Sequencing Reveals Unique Genes that** 2 **Contributed to the Adaptive Evolution of the Mikado Pheasant**

3  
4 **Short title:** The Mikado Pheasant Genome and Adaptive Evolution

5  
6 Chien-Yueh Lee<sup>1†</sup>, Ping-Han Hsieh<sup>1†</sup>, Li-Mei Chiang<sup>1</sup>, Amrita Chattopadhyay<sup>2</sup>,  
7 Kuan-Yi Li<sup>3,4</sup>, Yi-Fang Lee<sup>1</sup>, Tzu-Pin Lu<sup>5</sup>, Liang-Chuan Lai<sup>6</sup>, En-Chung Lin<sup>7</sup>, Hsinyu  
8 Lee<sup>1,8,9</sup>, Shih-Torng Ding<sup>7,9</sup>, Mong-Hsun Tsai<sup>2,9,10,11\*</sup>, Chien-Yu Chen<sup>3,9,12\*</sup>, and Eric  
9 Y. Chuang<sup>1,2,5,9,13\*</sup>

10  
11 <sup>1</sup>Graduate Institute of Biomedical Electronics and Bioinformatics, National Taiwan  
12 University, Taipei 10617, Taiwan

13  
14 <sup>2</sup>Bioinformatics and Biostatistics Core, Center of Genomic Medicine, National  
15 Taiwan University, Taipei 10055, Taiwan

16  
17 <sup>3</sup>Department of Bio-Industrial Mechatronics Engineering, National Taiwan University,  
18 Taipei 10617, Taiwan

19  
20 <sup>4</sup>Institute of Plant and Microbial Biology, Academia Sinica, Taipei, 11529, Taiwan

21  
22 <sup>5</sup>Institute of Epidemiology and Preventive Medicine, National Taiwan University,  
23 Taipei 10055, Taiwan

24  
25 <sup>6</sup>Graduate Institute of Physiology, National Taiwan University, Taipei 10051, Taiwan

26  
27 <sup>7</sup>Department of Animal Science and Technology, National Taiwan University, Taipei  
28 10617, Taiwan

29  
30 <sup>8</sup>Department of Life Science, National Taiwan University, Taipei 10617, Taiwan

31  
32 <sup>9</sup>Center for Biotechnology, National Taiwan University, Taipei 10672, Taiwan

33  
34 <sup>10</sup>Institute of Biotechnology, National Taiwan University, Taipei 10672, Taiwan

35  
36 <sup>11</sup>Agricultural Biotechnology Research Center, Academia Sinica, Taipei 11529,  
37 Taiwan University, Taipei, Taiwan

39 <sup>12</sup>Center for Systems Biology, National Taiwan University, Taipei 10672, Taiwan

40

41 <sup>13</sup>Graduate Institute of Chinese Medical Science, China Medical University, Taichung  
42 40402, Taiwan

43

44 <sup>†</sup> These authors contributed equally to the work.

45

46 \* Corresponding authors

47 Eric Y. Chuang

48 Department of Electrical Engineering, Graduate Institute of Biomedical Electronics  
49 and Bioinformatics, National Taiwan University, Taipei 10617, Taiwan

50 Phone: +886-2-3366-3660, Fax: +886-2-3366-3682, E-mail: chuangey@ntu.edu.tw

51

52 Chien-Yu Chen

53 Department of Bio-Industrial Mechatronics Engineering, National Taiwan University,  
54 Taipei 10617, Taiwan

55 Phone: +886-2-3366-5334, E-mail: chienyuchen@ntu.edu.tw

56

57 Mong-Hsun Tsai

58 Institute of Biotechnology, National Taiwan University, Taipei, Taiwan

59 Phone: +886-2-3366-6009, E-mail: motiont@ntu.edu.tw

60

### 61 **E-mail addresses**

62 Chien-Yueh Lee: d00945006@ntu.edu.tw

63 Ping-Han Hsieh: r04945025@ntu.edu.tw

64 Li-Mei Chiang: dytk2134@gmail.com

65 Amrita Chattopadhyay: amrita@ntu.edu.tw

66 Kuan-Yi Li: kyli.tw@gmail.com

67 Yi-Fang Lee: b01901110@ntu.edu.tw

68 Tzu-Pin Lu: tbenlu@gmail.com

69 Liang-Chuan Lai: llai@ntu.edu.tw

70 En-Chung Lin: eclin@mail2000.com.tw

71 Hsinyu Lee: hsinyu@ntu.edu.tw

72 Shih-Torng Ding: sding@ntu.edu.tw

73 Mong-Hsun Tsai: motiont@ntu.edu.tw

74 Chien-Yu Chen: chienyuchen@ntu.edu.tw

75 Eric Y. Chuang: chuangey@ntu.edu.tw

1  
2  
3  
4  
5  
6  
7  
8  
9  
10  
11  
12  
13  
14  
15  
16  
17  
18  
19  
20  
21  
22  
23  
24  
25  
26  
27  
28  
29  
30  
31  
32  
33  
34  
35  
36  
37  
38  
39  
40  
41  
42  
43  
44  
45  
46  
47  
48  
49  
50  
51  
52  
53  
54  
55  
56  
57  
58  
59  
60  
61  
62  
63  
64  
65

76 **Abstract**

77 **Background:** The Mikado pheasant (*Syrmaticus mikado*) is a nearly endangered  
78 species indigenous to high-altitude regions of Taiwan. It possesses a unique position  
79 in evolution because of its geographic isolation. Currently, the genetic background  
80 and adaptive behaviors of the Mikado pheasant remain unclear.

81 **Results:** We present the draft genome of the Mikado pheasant, which consists of 1.04  
82 Gb of DNA and 15 972 annotated protein-coding genes. The Mikado pheasant  
83 displays expansion and positive selection of genes related to features that contribute to  
84 its adaptive evolution, such as energy metabolism, oxygen transport, hemoglobin  
85 binding, radiation response, immune response, and DNA repair. The major  
86 histocompatibility complex (MHC) region contains 39 putative genes within 227 kb  
87 of DNA. Compared with the chicken MHC, we not only found that *TAPBP* and the  
88 *TAP1-TAP2* block are in inverse orientation, but also identified some genes  
89 undergoing rapid evolution. The complete mitochondrial genome was further  
90 sequenced, assembled, and compared against 4 other long-tailed pheasants. The  
91 results from molecular clock analysis suggest that ancestors of the Mikado pheasant  
92 migrated from the north to Taiwan about 3.47 million years ago.

93 **Conclusions:** This study provides a valuable genomic resource for the Mikado  
94 pheasant, insights into its adaptation to high altitude, and the evolutionary history of  
95 the genus *Syrmaticus*, which could potentially be useful for future studies  
96 investigating molecular evolution, genomics, and immunogenetics.

97  
98 **Keywords:** Mikado pheasant, *Syrmaticus mikado*, long-tailed pheasant,  
99 whole-genome sequencing, *de novo* genome assembly, adaptive evolution

## 100 **Background**

101 The Mikado pheasant (*Syrmaticus mikado*), which is a long-tailed pheasant  
102 indigenous to Taiwan, belongs to the family *Phasianidae* in the order Galliformes  
103 (Additional file 1: Fig. S1A, B). The Mikado pheasant is known to inhabit a variety of  
104 habitats in the mountainous regions of Central and Southern Taiwan at very high  
105 elevations ranging from 1600 to 3500 meters [1, 2]. The Mikado pheasant faced  
106 endangerment due to hunting pressure and habitat destruction [3, 4] until it became  
107 protected under the Wildlife Conservation Act. Currently, the International Union for  
108 Conservation of Nature (IUCN) Red List has classified the Mikado pheasant as a  
109 nearly threatened species, showing a decreasing trend in the overall population with a  
110 total estimate of approximately 15 000 mature birds. The rare and precious Mikado  
111 pheasant is a national icon in Taiwan and is depicted on its 1000 dollar banknote.

112 The *de novo* genome assembly of endangered species is an effective approach for  
113 the identification of genomic signatures associated with environmental adaptation and  
114 behavioral attributes. Genome studies have assisted in the discovery of genetic defects  
115 and deleterious mutations, and phylogenetic reconstruction can reveal genetic  
116 relationships and evolutionary history, thus leading to the conservation and rescue of  
117 endangered species [5-9]. The Mikado pheasant possesses a unique position in  
118 evolution because of its geographic isolation. It is one of 5 long-tailed pheasants in  
119 the *Syrmaticus* genus and belongs to a monophyletic group [10]. Due to limited  
120 molecular data, very few studies have been conducted to investigate the phylogenetic  
121 relationships and divergence time of species within the genus. Moreover, the Mikado  
122 pheasant is mainly found in Yushan National Park [11], which has numerous  
123 extremely high mountains exceeding an altitude of 3000 meters (Additional file 1: Fig.  
124 S2). As high altitudes are associated with extremely cold climates and lower

1 125 concentrations of oxygen, hypoxic stress is observed in the pheasant. Considering its  
2  
3 126 importance as a species facing endangerment, the present unavailability of genetic  
4  
5 127 information regarding the Mikado pheasant motivated the *de novo* assembly of its  
6  
7 128 genome, followed by a detailed study of its genetic background and subsequent  
8  
9 129 adaptive behaviors.

10  
11  
12 130 Here we report the whole-genome assembly of the Mikado pheasant and provide  
13  
14 131 insights into the adaptive mechanisms of the pheasant. This genome-wide study  
15  
16 132 reveals the evolutionary adaptation of the Mikado pheasant to high altitudes,  
17  
18 133 including changes in gene family size and/or molecular signatures of positive  
19  
20 134 selection associated with energy metabolism, oxygen transport, hemoglobin binding,  
21  
22 135 radiation response, immune response, and DNA repair. The estimated time of  
23  
24 136 divergence among the 5 long-tailed pheasant species reconstructs the evolutionary  
25  
26 137 history of the lineage and allows us to propose a hypothesis for the biogeographical  
27  
28 138 speciation of the Mikado pheasant. Additionally, in comparison with the chicken, the  
29  
30 139 curated major histocompatibility complex gene loci of the Mikado pheasant display a  
31  
32 140 high level of synteny, mainly across inverse regions in 2 gene blocks, and several  
33  
34 141 rapidly evolving genes.

40  
41 142

## 44 143 **Data Description**

### 48 144 **Genome assembly and annotation**

50  
51 145 In total, 171.7 Gb of raw DNA sequence reads (Additional file 1: Table S1) were  
52  
53 146 generated, resulting in an approximately 160-fold sequencing coverage based on the  
54  
55 147 1.07 Gb genome size estimated by KmerGenie [12]. After filtering the low-quality  
56  
57 148 reads and removing the read adapters, the high-quality reads were used to build  
58  
59 149 contigs. The contigs were assembled into a 1.04 Gb sequence of the draft genome.



1 150 The N50 lengths of the contigs and scaffolds were 13.46 kb and 11.32 Mb,  
2  
3 151 respectively. The overall GC content of the Mikado pheasant genome was 41.13%,  
4  
5 152 which is similar to that of the chicken, duck, turkey, and zebra finch (Additional file 1:  
6  
7 153 Fig. S3). The size of the longest assembled sequence was 50.28 Mb, and 928 scaffolds  
8  
9 154 were longer than 10 kb. The basic statistics of both the contigs and scaffolds  
10  
11 155 assembled using MaSuRCA [13] are shown in Table 1. The cumulative length plots  
12  
13 156 (Additional file 1: Fig. S4A, B) and the Nx plot for the scaffolds (Additional file 1:  
14  
15 157 Fig. S5) showed that almost all the scaffolds were assembled with very long lengths,  
16  
17 158 but only a small number of short sequences were present in the scaffolds.  
18  
19  
20  
21

22 159 Before performing the gene prediction and annotation, the interspersed and low  
23  
24 160 complexity regions were first masked using RepeatMasker [14]. Approximately  
25  
26 161 8.91% of the sequences were identified as interspersed repeats, 1.32% of the  
27  
28 162 sequences were identified as long tandem repeat (LTR) elements, and overall 11.46%  
29  
30 163 of the total bases were identified (Additional file 1: Table S2). After masking the  
31  
32 164 repeats and extrinsic data, an *ab initio* gene prediction was performed using Augustus  
33  
34 165 [15], followed by EVIDENCEModeler [16]. The final gene models comprised 27 255  
35  
36 166 transcripts (proteins). Of the predicted proteins, 15 972 (58.6%) could be strictly  
37  
38 167 aligned to the National Center for Biotechnology Information (NCBI) non-redundant  
39  
40 168 (NR) protein database for Aves and Reptilians. The statistics of annotated genes in the  
41  
42 169 Mikado pheasant averaged 19.9 kb per gene, 1625 bp per coding DNA sequence  
43  
44 170 (CDS), 164.1 bp per exon, and 2053 bp per intron (Additional file 1: Table S3), which  
45  
46 171 are similar composition in length to other avian species [17]. Out of the 15 972 NR  
47  
48 172 annotated proteins, 14 124 proteins were well annotated to the Pfam domains. A total  
49  
50 173 of 5626 Pfam domains were identified based on our predictions.  
51  
52  
53  
54  
55  
56  
57  
58  
59  
60  
61  
62  
63  
64  
65

## 175 **Results**

### 176 **Assessment of the assembly quality**

177 The overall DNA mapping rate of the paired-end libraries was >90% for the  
178 concordant paired read alignment and >96% for both paired and single read alignment  
179 (Additional file 1: Table S4). Thus, the assembly utilized most of the DNA reads. We  
180 further examined the per-base alignment coverage. The results (Additional file 1: Fig.  
181 S6) showed that most of the genome positions had a coverage between approximately  
182 57- and 121-fold and an average sequence coverage of 88-fold, which is very similar  
183 to the sequencing depth of DNA paired-end libraries (98.7x). Thus, our draft genome  
184 is well assembled.

185 To evaluate the quality of the assembled genome [18], the RNA reads were  
186 mapped onto the draft genome. The overall alignment rate of both RNA libraries  
187 showed that approximately 80% of the reads could be concordantly aligned to the  
188 scaffolds, indicating that most of the expressed protein-coding genes could be found  
189 in the draft genome (Additional file 1: Table S5). Moreover, the BUSCO [19]  
190 benchmark was used to evaluate the genes predicted from the genome assembly  
191 (Additional file 1: Table S6). Of the 3023 single-copy orthologs in the vertebrate  
192 lineage, approximately 88.6% of the orthologs were found in our assembly, which is  
193 similar to the results obtained in duck (88.6%), turkey (87.5%), and zebra finch  
194 (88.8%). These results suggested that a potentially large number of genes, along with  
195 their complete structure, could be predicted from the genome.

196

### 197 **Genome comparison**

198 To understand the similarities between the Mikado pheasant and the chicken at the  
199 genomic level, assembled scaffolds that were longer than 0.25% of the aligned

1 200 chicken chromosome were selected and plotted onto a syntenic map with an  
2  
3 201 alignment length of at least 3 kb using MUMmer [20]. The identities of each chicken  
4  
5 202 chromosome were between 86.24% and 89.98%, and the overall coverage was  
6  
7 203 85.28% (i.e., 855.35 Mb of the assembled scaffolds could be mapped onto the chicken  
8  
9 204 genome; Additional file 1: Table S7). The syntenic relationships between the Mikado  
10  
11 205 pheasant scaffolds and the chicken chromosomes were highly conserved, but a few of  
12  
13 206 the chromosomes could be only partially aligned. In particular, 3 well-assembled  
14  
15 207 scaffolds, i.e., scaffold14, scaffold69, and scaffold46, were mapped to nearly the full  
16  
17 208 length of chicken chromosomes 15, 23, and 24, respectively. Notably, compared to  
18  
19 209 the scaffolds of the Mikado pheasant, the chicken chromosomes, including  
20  
21 210 chromosomes 6, 11, 18, and 21, were properly aligned, but with obvious inversions  
22  
23 211 (Fig. 1A). More stringent conditions were then considered to evaluate the alignment  
24  
25 212 of certain scaffolds to multiple chromosomes (e.g., scaffold1 and scaffold45; Fig. 1B);  
26  
27 213 however, further confirmation is required to determine whether this finding represents  
28  
29 214 the actual presence of intrachromosomal translocations in the Mikado pheasant  
30  
31 215 genome. Additionally, the alignment between the Mikado pheasant scaffolds and the  
32  
33 216 turkey chromosomes provided similar results (Additional file 1: Fig. S7A), but the  
34  
35 217 Mikado pheasant scaffolds were poorly aligned with the zebra finch chromosomes  
36  
37 218 (Additional file 1: Fig. S7B). In general, the Mikado scaffolds not only displayed a  
38  
39 219 high level of synteny with the chicken and turkey scaffolds but also displayed a high  
40  
41 220 frequency of potentially highly conserved regions, chromosomal rearrangements, and  
42  
43 221 translocations.  
44  
45  
46  
47  
48  
49  
50  
51  
52  
53

## 54 222

### 55 223 **Phylogenetic relationships of the Mikado pheasant**

56  
57 224 To compare the protein sequences of the Mikado pheasant against homologous  
58  
59 225 protein families of other birds and organisms, OrthoMCL [21] was used to define the  
60  
61  
62  
63  
64  
65

1 226 orthologous gene families in 10 species. Proteins with sequences that were similar to  
2  
3 227 those of the Mikado pheasant—5 birds (i.e., chicken, duck, flycatcher, turkey, and  
4  
5 228 zebra finch), 2 reptiles (anole lizard and Chinese softshell turtle), and 2 mammals  
6  
7 229 (human and mouse)—were classified into each gene family. First, 15 161 Mikado  
8  
9 230 pheasant genes were identified in 18 220 families, and 5287 single-gene families that  
10  
11 231 were common across the 10 species were then used to construct a Bayesian maximum  
12  
13 232 clade credibility phylogenetic tree to estimate the time of divergence [22] (Fig. 2).  
14  
15 233 The estimated time of divergence among the 3 *Phasianidae* was between 21.4 and  
16  
17 234 28.9 million years ago (Mya), and the Mikado pheasant was found to be more closely  
18  
19 235 related to the turkey than to the chicken. The branches of the Galliformes and duck  
20  
21 236 (76.4 Mya), Passeriformes and Galliformes (105.3 Mya), and anole lizard and Aves  
22  
23 237 (266.3 Mya) displayed divergence times that were similar to those reported in the  
24  
25 238 literature [23-25].  
26  
27  
28  
29  
30

31 239

### 32 33 34 240 **Gene family evolution**

35  
36 241 To assess the changes in the gene family sizes, a likelihood model was used to  
37  
38 242 examine significant expansions and contractions of gene families, particularly in the  
39  
40 243 Mikado pheasant lineage. Expansions or contractions in gene families indicate that  
41  
42 244 total number of genes in a gene family are increasing or decreasing, respectively. The  
43  
44 245 results revealed 311 expanded and 15 contracted gene families compared with the  
45  
46 246 common ancestor of the Mikado pheasant and turkey (Fig. 2). In total, 86 gene  
47  
48 247 ontology (GO) categories were significantly enriched ( $p < 0.05$ , empirical test) among  
49  
50 248 the 311 expanded genes. Fifty of these GO categories were further classified into 8  
51  
52 249 main categories, including actin cytoskeleton, morphogenesis, catalytic activity, cell  
53  
54 250 differentiation, binding, metabolism, cytoplasm, and organelle organization and  
55  
56 251 biogenesis (Additional file 2: Table S8). In particular, the gene families involved in  
57  
58  
59  
60  
61  
62  
63  
64  
65

1 252 oxygen and heme binding (GO:0019825 and GO:0020037, respectively),  
2  
3 253 monooxygenase activity (GO:0004497), and energy metabolism (GO:0046034, ATP  
4  
5 254 metabolic process; GO:0005977, glycogen metabolic process) were substantially  
6  
7 255 expanded in the Mikado pheasant. Conversely, 7 of the 25 GO categories in the  
8  
9 256 contracted gene families were significantly enriched in immune system processes and  
10  
11 257 apoptosis (Additional file 1: Table S9). Moreover, 8 of the 75 expanded gene families  
12  
13 258 were annotated as olfactory receptors (Additional file 2: Table S10) by the Pfam  
14  
15 259 database [26].  
16  
17  
18  
19  
20  
21

22 260

### 23 261 **Positive selection**

24 262 To detect the genes that evolved rapidly under positive selection from the avian  
25  
26 263 species, because of living at and between high and low elevation, 7132 single-copy  
27  
28 264 orthologs were analyzed from 9038 genes common across the Mikado pheasant,  
29  
30 265 chicken, turkey, duck, and zebra finch (Additional file 1: Fig. S8). According to the  
31  
32 266 branch-site model and the likelihood ratio test, the positively selected genes (PSGs)  
33  
34 267 identified in the Mikado pheasant were mainly enriched in functions such as  
35  
36 268 metabolism (GO:0008152), cell (GO:0005623), and binding (GO:0005488) that  
37  
38 269 belong to biological process, cellular component, and molecular function ontology  
39  
40 270 terms, respectively (Additional file 1: Fig. S9). We further examined the PSGs  
41  
42 271 involved in metabolism. The 45 PSGs enriched in metabolism-related functions  
43  
44 272 ( $p$ -values < 0.05) were classified according to the GOSlim categories into lipid  
45  
46 273 metabolism (GO:0006629), carbohydrate metabolic processes (GO:0005975), and  
47  
48 274 generation of precursor metabolites and energy (GO:0006091), which included 13, 3,  
49  
50 275 and 2 GO functions, respectively (Additional file 2: Table S11). Of these  
51  
52 276 metabolism-related PSGs, 4 genes were found to be involved in the inositol phosphate  
53  
54 277 metabolism (map00562;  $p$ -value < 0.01) and phosphatidylinositol signaling system  
55  
56  
57  
58  
59  
60  
61  
62  
63  
64  
65

1 278 (map04070;  $p$ -value < 0.05) through a functional enrichment analysis from the Kyoto  
2  
3 279 Encyclopedia of Genes and Genomes (KEGG) database (Additional file 1: Table  
4  
5 280 S12).

6  
7 281 In addition to metabolism, other high-altitude adaptations were observed, such as  
8  
9 282 response to radiation (GO:0010212, response to ionizing radiation; GO:0010332,  
10  
11 283 response to gamma radiation; GO:0034644, cellular response to UV; and  
12  
13 284 GO:0071480, cellular response to gamma radiation), DNA repair (GO:0000731, DNA  
14  
15 285 synthesis involved in DNA repair; GO:0045739, positive regulation of DNA repair;  
16  
17 286 and GO:0006284, base-excision repair), and oxygen transport (GO:0016706,  
18  
19 287 oxidoreductase activity; GO:0072593, reactive oxygen species metabolic process;  
20  
21 288 GO:0019825, oxygen binding; and GO:2000377, regulation of reactive oxygen  
22  
23 289 species metabolic process; Additional file 2: Table S13). Moreover, 43 PSGs in the  
24  
25 290 Mikado pheasant were significantly enriched in the categories of lymphocyte  
26  
27 291 activation (GO:0046649; including 8 GO terms) and cytokine production  
28  
29 292 (GO:0001816; including 8 GO terms) (Additional file 2: Table S14). We also  
30  
31 293 identified the janus kinase/signal transducer and activator of transcription (Jak-STAT)  
32  
33 294 signaling pathway (map04630;  $p$ -value < 0.05), which was enriched in 5 PSGs (i.e.,  
34  
35 295 *BCL2*, *CCND3*, *IL12RB2*, *IL23R*, and *IL7*), in the KEGG analysis (Additional file 1:  
36  
37 296 Table S15).

38  
39 297 To further identify the PSGs that were exclusively present in the Mikado  
40  
41 298 pheasant in comparison with the existing avian genomes, additional protein sequences  
42  
43 299 were retrieved from 44 birds using the GigaScience database [17], in addition to the 5  
44  
45 300 birds (i.e., chicken, turkey, duck, zebra finch, and flycatcher) available in Ensembl. In  
46  
47 301 total, 5287 single-copy orthologs from 50 avian species were identified, and branch  
48  
49 302 model tests were performed to identify the PSGs for further GO enrichment analysis.  
50  
51 303 We identified 149 genes that were positively selected in the Mikado pheasant in  
52  
53  
54  
55  
56  
57  
58  
59  
60  
61  
62  
63  
64  
65

1 304 comparison to the other 49 birds. Among these genes, 4 of the 39 enriched GO terms  
2  
3 305 were related to ubiquitin activity (GO:0006511, ubiquitin-dependent protein catabolic  
4  
5 306 process; GO:0019787, ubiquitin-like protein transferase activity; GO:0061631,  
6  
7 307 ubiquitin conjugating enzyme activity; and GO:0061630, ubiquitin protein ligase  
8  
9 308 activity; all  $p$ -values  $< 0.05$ ). Additionally, the PSGs were found to be involved in the  
10  
11 309 immune response, such as the positive regulation of defense response to virus by host  
12  
13 310 (GO:0002230) and T cell differentiation in thymus (GO:0033077; all  $p$ -values  $< 0.05$ ;  
14  
15 311 Additional file 2: Table S16).  
16  
17  
18  
19  
20  
21

22 312

### 23 313 **Identification of the MHC-B region of the Mikado pheasant**

24 314 The major histocompatibility complex (MHC) is a cluster of genes that is associated  
25  
26 315 with functions such as infectious disease resistance and immune responses in all  
27  
28 316 jawed vertebrates [27]. The MHC B-locus (MHC-B) performs the main MHC  
29  
30 317 functions in the chicken [28, 29]. Based on the above analysis, an assembled scaffold  
31  
32 318 (scaffold208) was almost able to cover the known MHC-B contiguous region [30] on  
33  
34 319 chicken chromosome 16. To understand the evolution of the MHC-B genes between  
35  
36 320 the Mikado pheasant and the chicken, the predicted gene loci were manually curated  
37  
38 321 by incorporating evidence from the aligned RNA-Seq data and homologous genes  
39  
40 322 from chicken and turkey using Web Apollo software [31]. After the curation, 39  
41  
42 323 putative MHC genes of the Mikado pheasant were identified within a 227 kb  
43  
44 324 sequence (Table 2), including 7 MHC class II loci (*BLB1*, *TAPBP*, *BLB2*, *BRD2*,  
45  
46 325 *DMA*, *DMB1*, and *DMB2*), 4 MHC class I loci (*BF1*, *TAP1*, *TAP2*, and *BF2*), and 5  
47  
48 326 MHC class III loci (*C4*, *CenpA*, *CYP21*, *TNXB*, and *LTB4R1*).  
49  
50  
51  
52  
53  
54

55 327 Recently, gene loci involved in immunity have been shown to have a higher ratio  
56  
57 328 of nonsynonymous ( $d_N$ ) to synonymous ( $d_S$ ) amino acid substitutions due to  
58  
59 329 interactions with rapidly evolving pathogens under selective pressures [32]. *KIFC1*,

1 330 *BTN1*, *Blec2*, *BLB1*, *BLB2*, and *BF2* had comparatively high  $d_N/d_S$  ratios between the  
2  
3 331 Mikado pheasant and the chicken (Table 2). Conversely, the genes with  
4  
5 332 comparatively lower  $d_N/d_S$  ratios included *TRIM7.2*, *TRIM41*, *BRD2*, and *CenpA*. As  
6  
7 333 shown in Fig. 3, the Mikado pheasant and the chicken displayed similarity in the  
8  
9 334 MHC-B region and shared an almost perfect syntenic gene order. Based on the  
10  
11 335 RNA-Seq results, 2.54 million reads were mapped onto 38 MHC-B genes (except for  
12  
13 336 *BLB2*) of the Mikado pheasant, 27 of which had at least a 1-fold average coverage per  
14  
15 337 nucleotide. Furthermore, 15 genes possessed more than 100-fold average coverage per  
16  
17 338 nucleotide, providing concrete evidence of a reliable prediction. Notably, 2 gene loci,  
18  
19 339 i.e., *TAPBP* and the *TAP1-TAP2* block, were inversely oriented compared to the  
20  
21 340 chicken sequence.  
22  
23  
24  
25  
26  
27  
28

29  
30 341

### 342 **Evolutionary history of *Syrmaticus* pheasants**

31 343 The mitochondrial genome of the Mikado pheasant was assembled based on the  
32  
33 344 short-read libraries. The circular complete genome had a total length of 16 680 bp,  
34  
35 345 including 13 protein-coding genes, 2 rRNAs, 22 tRNAs, and a control region  
36  
37 346 (Additional file 1: Table S17). The average nucleotide composition was 30.52% A,  
38  
39 347 31.20% C, 13.44% G, and 24.84% T. To investigate the evolutionary history of the  
40  
41 348 genus *Syrmaticus*, which includes 5 long-tailed pheasants, the phylogeny was  
42  
43 349 reconstructed, and the divergence times were estimated using the mitochondrial  
44  
45 350 genomes. According to molecular clock analysis, the genetic divergence of the  
46  
47 351 Mikado pheasant began approximately 3.47 (2.78-4.71) Mya (Fig. 4). The tree  
48  
49 352 topology is consistent with previous studies [10, 33], and the divergence time suggests  
50  
51 353 that the Mikado pheasant might have originated in the late Pliocene.  
52  
53  
54  
55  
56  
57  
58  
59  
60  
61  
62  
63  
64  
65



1 355 **Amino acid substitution analysis in Mikado pheasant hemoglobin genes**

2  
3 356 Living at high elevations directly incurs the challenge of low oxygen availability.  
4  
5 357 Additionally, exposure to low-pressure environments causes oxygen saturation in the  
6  
7 358 arterial blood, thus decreasing and restricting oxygen supplementation to tissues [34].  
8  
9  
10 359 Certain birds show an increased combined affinity between blood and oxygen via  
11  
12 360 amino acid substitutions in the major hemoglobin [35-37]. To investigate their role in  
13  
14 361 adaptation to high-altitude environments, amino acid substitutions were examined in  
15  
16  
17 362 the Mikado pheasant hemoglobin sequences. By comparing 6 avian species, an amino  
18  
19 363 acid substitution with different consensus residues was found in the Mikado pheasant  
20  
21 364 (Additional file 1: Fig. S10), and the substitution of alanine with threonine occurred at  
22  
23 365 residue 78 of the alpha-A subunit—the major component of hemoglobin isoforms.  
24  
25  
26 366 The Andean goose, a kind of waterfowl living at over 3000 meters in the Andes, has  
27  
28 367 been reported to carry the identical substitution [38].  
29  
30

31 368

32  
33  
34  
35 369 **Discussion**

36  
37  
38 370 In this study, experimental data and statistical approaches were used to evaluate  
39  
40 371 the genome assembly of the Mikado pheasant. Notably, the genome sequence of this  
41  
42 372 species was previously unknown, and this study provides a comparative analysis of  
43  
44 373 various genomes using a large number of tools at different stages for the assembly of  
45  
46 374 the Mikado pheasant genome. While conducting the genome assembly, we used not  
47  
48 375 only MaSuRCA but also assembly tools, such as ALLPATHS-LG [39], JR [40],  
49  
50 376 Newbler [41], SGA [42], and SOAPdenovo [43]. All these assembly tools produced  
51  
52 377 similar draft genome sizes, and MaSuRCA and SGA also showed similar results in  
53  
54 378 terms of the N50 value and the scaffold number (Additional file 1: Table S18). To  
55  
56 379 facilitate the downstream analysis, we used several methods to compare these  
57  
58  
59  
60  
61  
62  
63  
64  
65

1 380 assembly sets. However, no single assembly tool outperformed the others in terms of  
2  
3 381 the number of annotations for the predicted genes, the quality of the genome  
4  
5 382 compared to that of other birds, and the BUSCO benchmark. In this study, the draft  
6  
7 383 genome assembled using MaSuRCA was selected because it generated dramatically  
8  
9 384 longer scaffolds that displayed a decent score on the BUSCO benchmark and  
10  
11 385 produced proper annotations for the predicted genes. However, although a small  
12  
13 386 number of misassembled or fragmented sequences was present in our proposed  
14  
15 387 assembly (Fig. 1A, B), our approach still provides a practical strategy for  
16  
17 388 whole-genome assembly using only short-read sequencing technology. We assert that  
18  
19 389 the high coverage of our sequencing data, differing library insert sizes, and the use of  
20  
21 390 a combination of tools, such as MaSuRCA and SSPACE for assembly and scaffolding,  
22  
23 391 respectively, contributed to high-quality *de novo* assembly of the Mikado pheasant  
24  
25 392 genome with a genome length of approximately 1 Gb.  
26  
27  
28  
29  
30

31       Recent studies have reported phylogenetic tree topologies for the Mikado  
32  
33 394 pheasant and other Galliformes birds [33, 44, 45]; however, these studies relied on  
34  
35 395 small amounts of genomic DNA as supporting evidence. To obtain a highly accurate  
36  
37 396 phylogenetic inference, long DNA sequences are necessary for the reconstruction of a  
38  
39 397 high-resolution tree [46-48]. This study used whole-exome information, with 5287  
40  
41 398 single-copy orthologs totaling approximately 8 Mb of coding sequence, to reconstruct  
42  
43 399 the phylogeny and estimate the divergence time among the Mikado pheasant and  
44  
45 400 other birds (Fig. 2). Our results strongly suggest that the Mikado pheasant is more  
46  
47 401 similar to the turkey than the chicken in the Galliformes clade, which is consistent  
48  
49 402 with previous studies [33, 44, 45].  
50  
51  
52  
53

54       We additionally implemented a comprehensive phylogenetic analysis strategy to  
55  
56 403 obtain information regarding the adaptive mechanisms of the Mikado pheasant to high  
57  
58 404 elevations. Compared to birds living at low altitudes, both the positive gene selection  
59  
60 405  
61  
62  
63  
64  
65

1 406 and gene expansion analyses showed a significant enrichment of genes relevant to  
2  
3 407 energy metabolism (Additional file 2: Tables S8 and S11). This finding was  
4  
5 408 consistent with the prior study that identified similar genes in other species inhabiting  
6  
7 409 the highlands [49]. Moreover, the 4 metabolism-related PSGs (i.e., *INPP5A*, *INPP5J*,  
8  
9 410 *PI4KB*, and *PLCE1*) that were involved in the inositol phosphate metabolism and  
10  
11 411 phosphatidylinositol signaling system (Additional file 1: Table S12) were previously  
12  
13 412 reported to be enriched in Tibetan pigs living at high altitudes [50]. Of these genes,  
14  
15 413 *INPP5A* and *INPP5J* play a role in the hydrolysis of inositol polyphosphates [51],  
16  
17 414 *PI4KB* is a phosphatidylinositol kinase that induces phosphorylation reactions [52],  
18  
19 415 and *PLCE1*, which is a phospholipase enzyme, regulates gene expression, cell growth,  
20  
21 416 and differentiation [53]. Another robust signal of its adaptation to high altitude was  
22  
23 417 obtained from genes significantly associated with expansion of and positive selection  
24  
25 418 for the enhancement of hemoglobin binding and oxygen transport (Additional file 2:  
26  
27 419 Tables S8 and S13). Furthermore, for both the Mikado pheasant and Andean goose,  
28  
29 420 an amino acid substitution was identified in the hemoglobin alpha-A subunit  
30  
31 421 (Additional file 1: Fig. S10). The substitution of threonine at this position has recently  
32  
33 422 been shown to cause an increase in the molecular volume, which might enhance the  
34  
35 423 solubility of hemoglobin and facilitate adaptation to desiccating and high-altitude  
36  
37 424 environments [38]. Through gene expansion, the genes of the Mikado pheasant that  
38  
39 425 are involved in skeletal and cardiac muscle fiber development (Additional file 2:  
40  
41 426 Table S8) and the enhanced functions of the additional GO terms implied that the  
42  
43 427 biomass of the Mikado pheasant could be effectively produced in mountainous  
44  
45 428 regions without nourishment, hence strongly suggesting the existence of an adaptive  
46  
47 429 mechanism for high altitudes [54]. Finally, the PSGs in the radiation response,  
48  
49 430 immune response, and DNA repair categories (Additional file 2: Tables S13 and S14)  
50  
51 431 may reflect the increased resistance of the Mikado pheasant to long-term ultraviolet  
52  
53  
54  
55  
56  
57  
58  
59  
60  
61  
62  
63  
64  
65

1 432 radiation exposure through the induction of cytokine production [55] and lymphocyte  
2  
3 433 activation [56] and DNA repair processes.  
4

5 434 In this work, we annotated and curated the MHC-B gene loci in the Mikado  
6  
7 435 pheasant, which is important for assessing the adaptive mechanisms associated with  
8  
9 436 endangered species, because variations in gene number in the MHC cluster could be  
10  
11 437 caused by exposure to pathogens or diseases [57, 58]. The genome of the Mikado  
12  
13 438 pheasant contains a number of MHC-B genes, and inversions were observed in the  
14  
15 439 *TAPBP* locus and the *TAP1-TAP2* block (Fig. 3) compared to the chicken genome; an  
16  
17 440 inverse orientation of the *TAP1-TAP2* block was also detected compared to the turkey  
18  
19 441 genome (Additional file 1: Fig. S11). A similar conversion at the MHC locus in  
20  
21 442 Galliformes has been reported in previous studies [27, 32, 59]. We further observed a  
22  
23 443 *Blec2*-like sequence with an inverse orientation located within the *BGI-Blec2* region  
24  
25 444 in the Mikado pheasant. We inferred that this region is likely similar to the *Blec4*  
26  
27 445 pseudogene of the chicken and highly similar to *Blec2* [30]. No *BLB2* genes were  
28  
29 446 predicted between the *TAPBP* and *BRD2* intergenic regions in the Mikado pheasant  
30  
31 447 MHC-B locus; however, these regions could be detected among the transcripts of our  
32  
33 448 RNA-Seq data. A likely explanation for the absence of a prediction of the *BLB2*-like  
34  
35 449 gene might be the existence of 2 unsequenced gap regions with a size of 1098 bp  
36  
37 450 within the *TAPBP-BRD2* block (5931 bp). Since *BLB2* is only 792 bp in length, it  
38  
39 451 could reside within the missing sequence.  
40  
41  
42  
43  
44  
45  
46  
47

48 452 In this study, we not only sequenced the whole genome of a genus of *Syrmaticus*  
49  
50 453 but also completed the full mitochondrial genome. Before whole-genome sequences  
51  
52 454 were available, mitochondrial sequences were widely utilized in molecular  
53  
54 455 phylogenetic analyses of the genus of *Gallus* [60, 61]. Based on the assembly of the  
55  
56 456 Mikado pheasant and the other 4 available sequences, we reconstructed a  
57  
58 457 phylogenetic tree and provide a completely sequenced mitochondrial genome for 5  
59  
60  
61  
62  
63  
64  
65

1 458 long-tailed pheasants. The topology of our reconstructed tree (Fig. 4) is consistent  
2  
3 459 with results from a previous study [10]. However, the time of divergence was  
4  
5 460 estimated to be earlier than the previously reported time [10] for the Mikado pheasant,  
6  
7 461 which might have been due to the use of a few mitochondrial or nuclear genes rather  
8  
9 462 than the complete mitochondrial genome. The reconstructed tree showed a potential  
10  
11 463 migration pathway of these pheasants. The ancestors of the Mikado pheasant, which  
12  
13 464 have been described to have migrated to the island of Taiwan, separated from the  
14  
15 465 lineage of the copper pheasant (*S. soemmerringii ijimae*). The copper pheasant is a  
16  
17 466 pheasant indigenous to Japan, whose ancestors might have separated from the lineage  
18  
19 467 of the Reeves's pheasant (*S. reevesii*) that has inhabited in Northern China. The  
20  
21 468 ancestors of Elliot's pheasant (*S. ellioti*) and Mrs. Hume's pheasant (*S. humiae*) have  
22  
23 469 branched from the Mikado pheasant, then separated into two present kinds of  
24  
25 470 pheasants that have alternatively roosted in the mountainous forests of Southeastern  
26  
27 471 and Southwestern China, respectively. According to paleogeographical reports,  
28  
29 472 Taiwan was formed approximately 4-5 Mya and attained its modern topography  
30  
31 473 approximately 3 Mya [62]. The sea level was lower during the glacial periods, and  
32  
33 474 Taiwan might have been connected to the mainland [63]. Our results suggest that the  
34  
35 475 evolutionary history of the Mikado pheasant might have included ancestors that  
36  
37 476 migrated from the north towards Taiwan approximately 3.47 Mya and consequently  
38  
39 477 were isolated by the Taiwan Strait during the warm interglacial periods during the  
40  
41 478 early Pleistocene.  
42  
43  
44  
45  
46  
47  
48  
49  
50  
51  
52  
53  
54  
55  
56  
57  
58  
59  
60  
61  
62  
63  
64  
65

## 480 **Materials and Methods**

### 481 *De novo* genome assembly

482 Blood samples were collected from a single female Mikado pheasant living in Central  
483 Taiwan; then, genomic DNA was extracted, and 2 paired-end libraries (280 bp and  
484 480 bp; average read length: 151 bp) and 5 mate pair libraries (1, 3, 5, 7, and 10 kb;  
485 average read length: 101 bp) were constructed according to the manufacturer's  
486 protocol. In addition, 2 RNA-Seq libraries from 2 male Mikado pheasants were  
487 prepared for the draft genome assessment and gene prediction (Additional file 1:  
488 Table S1). The DNA libraries were sequenced using the HiSeq platform (Illumina Inc.,  
489 San Diego, CA, USA), and the RNA libraries were sequenced using the HiScanSQ  
490 and HiSeq platforms.

491 The genome assembly performed in this study was divided into the following 3  
492 stages: 1) quality control and preprocessing, 2) contig assembly, and 3) scaffolding.  
493 First, the quality of the raw reads was examined using FastQC. Read trimming and  
494 adapter removal were performed as needed. For the mate pair libraries, only 35 bases  
495 from the 5' end of both reads were used in the scaffolding step. Next, contig assembly  
496 was performed using MaSuRCA (version 2.3.2). In this step, both the paired-end and  
497 mate pair libraries were employed. Finally, SSPACE (version 3.0) [64] was used to  
498 concatenate the contigs into scaffolds based on the 5 mate pair libraries. Scaffold  
499 sequences shorter than 300 bp were then excluded from the final assembly. The  
500 statistical results of the assembly were estimated using QUAST (version 3.2) [65].

501

### 502 **Evaluation of assembly quality**

503 Several metrics provided by BUSCO (version 1.21) were used to evaluate the  
504 assembly quality, including the number and length distribution of the scaffold

1 505 sequences, the mapping rate of the paired-end DNA reads and RNA reads, the  
2  
3 506 per-base coverage of the DNA read mapping, and the coverage of universal  
4  
5 507 single-copy orthologs. To evaluate the mapping rate of the reads and per-base  
6  
7 508 coverage, the paired-end DNA reads and RNA reads were aligned against the  
8  
9  
10 509 assembled scaffolds using Bowtie 2 [66] and TopHat2 [67], respectively. The  
11  
12 510 scaffolds were mainly assembled from the paired-end DNA reads, and the higher  
13  
14 511 mapping rate of the paired-end DNA reads suggests a higher degree of the final  
15  
16 512 assembly covering the raw reads. The per-base DNA read coverage was calculated  
17  
18 513 using BEDTools [68]. For each base, the expected coverage should be close to the  
19  
20 514 sequencing depth of the paired-end reads (approximately 98.7x). Regarding the RNA  
21  
22 515 reads, the mapping rate showed the completeness of the final assembly with respect to  
23  
24 516 the independent sequencing data from the transcriptomes of the Mikado pheasant. The  
25  
26 517 BUSCO benchmark is a single-copy ortholog set derived from the species of a major  
27  
28 518 lineage. The gene models predicted from the draft genome in the Mikado pheasant  
29  
30 519 were compared with the lineage of vertebrates (3023 orthologs in total) provided by  
31  
32 520 BUSCO. Protein sequences from the chicken, duck, turkey, and zebra finch were also  
33  
34 521 evaluated for comparison.  
35  
36  
37  
38  
39  
40  
41  
42

43 522

### 44 523 **Genome comparison**

45 524 To compare the genome of the Mikado pheasant with that of other avians, we  
46  
47 525 retrieved the whole-genome sequences of the chicken (Galgal4), turkey (UMD2) and  
48  
49 526 zebra finch (taeGut3.2.4) from the Ensembl database. Using the genome-wide  
50  
51 527 sequence aligner MUMmer (version 3.23), the chromosome-level differences and  
52  
53 528 similarities among the species were investigated and visualized. The structural  
54  
55 529 variants among the species were further reported using the “show-diff” utility in  
56  
57  
58 530 MUMmer. The chord diagrams of the alignment were generated using Circos [69].  
59  
60  
61  
62  
63  
64  
65

1 531

2  
3 **532 Gene prediction and annotation**

4  
5 533 First, RepeatMasker was applied to screen the scaffolds for interspersed repeats and  
6  
7 534 low-complexity regions in the DNA sequences, and the masked genome was used for  
8  
9  
10 535 further gene prediction. Then, homology-based, RNA-Seq, and *ab initio* prediction  
11  
12 536 approaches were used to identify protein-coding genes and build a consensus gene set  
13  
14 537 that included all predicted genes. For the homology protein sequence alignment, the  
15  
16 538 protein sequences of the chicken (Galgal4), turkey (UMD2), duck (BGI\_duck\_1.0)  
17  
18 539 and zebra finch (taeGut3.2.4) were collected from Ensembl. The protein sequence  
19  
20 540 alignments were performed using Exonerate (version 2.2.0) [70]. All RNA-Seq reads  
21  
22 541 were aligned against the repeat-masked genome using TopHat2, which generated  
23  
24 542 evidence of splice sites, introns, and exons. Additionally, Trinity (version 2.0.6) [71]  
25  
26 543 was utilized to assemble transcripts, and PASA (version 2.0.0) [72] was used to group  
27  
28 544 alternatively spliced isoforms. For the *ab initio* gene prediction, the standard  
29  
30 545 Augustus (version 3.0.3) pipeline was used to yield potentially predicted genes with  
31  
32 546 evidence from both homologous proteins and RNA-Seq. Next, the consensus gene set  
33  
34 547 was determined by consolidating the 3 types of gene prediction using  
35  
36 548 EvidenceModeler (version 1.1.1). Finally, the gene annotations were defined based  
37  
38 549 on the best sequence alignment against NCBI NR proteins in Aves and Reptilians  
39  
40 550 using BLASTP (version 2.2.29+), with the following criteria: identity  $\geq$  30%,  
41  
42 551 alignment length  $\geq$  80 bp, and E-value  $\leq$  1e<sup>-5</sup>. For the protein domain identification,  
43  
44 552 we annotated the domains using HMMER (version 3.1b2) [73] by scanning the Pfam  
45  
46 553 database (version 30.0). In addition, we used MAKER [74] (version 2.31.8) to predict  
47  
48 554 gene loci in the MHC region.  
49  
50  
51  
52  
53  
54  
55  
56  
57  
58  
59  
60  
61  
62  
63  
64  
65



1 556 **Gene families**

2  
3 557 To identify orthologs, the protein-coding genes of 5 birds (i.e., *Gallus gallus*,  
4  
5 558 *Meleagris gallopavo*, *Anas platyrhynchos*, *Taeniopygia guttata*, and *Ficedula*  
6  
7 559 *albicollis*) and 4 additional species (*Anolis carolinensis*, *Pelodiscus sinensis*, *Homo*  
8  
9 560 *sapiens*, and *Mus musculus*) were downloaded from Ensembl (release 82). The  
10  
11 561 sequence of the longest isoform was selected to represent the gene for each species,  
12  
13 562 despite the presence of protein isoforms. The all-vs-all BLASTP was applied to align  
14  
15 563 all protein sequences (including those of the Mikado pheasant) of the 10 species and 5  
16  
17 564 birds (excluding flycatcher) with E-value thresholds less than  $1e^{-5}$  and  $1e^{-20}$ ,  
18  
19 565 respectively. To examine the orthologous genes in the species of interest, OrthoMCL  
20  
21 566 (version 2.0.9) was used to classify the gene families, and 5287 single-gene families  
22  
23 567 were obtained from the 10 species, and 7132 single-gene families were obtained from  
24  
25 568 the 5 birds. Furthermore, MUSCLE (version 3.8.1551) [75] was used for the multiple  
26  
27 569 sequence alignment of the converted coding DNA sequences, and Gblocks (version  
28  
29 570 0.91b) [76] was used to remove the poorly aligned regions. After trimming, the genes  
30  
31 571 from each species were concatenated using the same order to reconstruct the  
32  
33 572 phylogenies and evaluate the divergence time. The concatenated sequences were used  
34  
35 573 to build a phylogenetic tree using RAxML (version 8.2.4) [77] via a maximum  
36  
37 574 likelihood search; then, the divergence time was analyzed using BEAST (version  
38  
39 575 2.3.2) with the GTR+I+ $\Gamma$  model, which is the best substitution model selected by  
40  
41 576 Modeltest (version 3.7) and PAUP\* (version 4.0a150) [78]. Four nodes were chosen  
42  
43 577 as the fossil calibration points from the TimeTree database [79], including  
44  
45 578 human-chicken (311.9 Mya), anole lizard-chicken (279.7 Mya), Chinese softshell  
46  
47 579 turtle-chicken (253.7 Mya), and human-mouse (89.8 Mya). The phylogenetic tree was  
48  
49 580 generated using the Strap R package [80]. To identify the gene families with a  
50  
51 581 expansion or contraction between the Mikado pheasant and other species, CAFE  
52  
53  
54  
55  
56  
57  
58  
59  
60  
61  
62  
63  
64  
65

1 582 (version 3.1) [81] was used to estimate the rates of gene family evolution from the  
2  
3 583 observed gene numbers in each family and the given phylogenetic tree. A  $p$ -value <  
4  
5 584 0.05 was used to indicate significant changes in the gene family size.  
6

7  
8 585

### 9 10 586 **Examination of genes under positive selection and enrichment analysis**

11  
12 587 To determine the genes that underwent positive natural selection in the Mikado  
13  
14 588 pheasant, CODEML from PAML (version 4.8) [82] was applied to both the  
15  
16 589 branch-site and branch models to investigate the genes in positively selected sites and  
17  
18 590 the genes with increased  $d_N/d_S$  values within the considered lineage of the Mikado  
19  
20 591 pheasant, respectively. For the branch-site model, we implemented likelihood ratio  
21  
22 592 tests to determine the statistical significance of positive selection for testing a null  
23  
24 593 model (model = 2, NSsites = 2, fix\_omega = 1, and omega = 1) against an alternative  
25  
26 594 model (model = 2, NSsites = 2, and fix\_omega = 0). Consequently, the false  
27  
28 595 discovery rates (FDRs) were computed with a cutoff of 0.05 to adjust for multiple  
29  
30 596 testing using the Benjamini-Hochberg procedure. Similarly, for the branch model tests,  
31  
32 597 the 2-ratio branch model (model = 2 and NSsites = 0) for the foreground (Mikado  
33  
34 598 pheasant) and background (other birds) branches and the one-ratio model (model = 0  
35  
36 599 and NSsites = 0) as the null model for all branches were implemented and compared  
37  
38 600 via likelihood ratio tests with respect to the FDR to evaluate the significance of genes  
39  
40 601 associated with accelerated evolution.  
41  
42  
43  
44  
45  
46  
47

48 602 The GO annotations of 4 birds (i.e., chicken, duck, turkey, and zebra finch)  
49  
50 603 retrieved from the Ensembl BioMart were used to characterize the functions of the  
51  
52 604 identified orthologs. A hypergeometric test was performed to identify significant GO  
53  
54 605 functions in these orthologs. However, the raw  $p$ -values of the hypergeometric tests  
55  
56 606 can easily be affected by the number of genes [83]; therefore, to address the  
57  
58 607 underlying bias of the hypergeometric distribution, we further calculated empirical  
59  
60  
61  
62  
63  
64  
65

1 608 *p*-values [84]. The empirical *p*-values were determined through 100K simulated  
2  
3 609 datasets by ranking the hypergeometric probability of enriched functional categories  
4  
5 610 compared with the null baseline probabilities. The null baseline probability was  
6  
7 611 established by randomly selecting a group of genes containing an equal number of  
8  
9 612 PSGs with an FDR < 0.05 for both the branch and branch-site models. For massively  
10  
11 613 enriched GO terms with similar functions, CateGORizer [85] was used to classify the  
12  
13 614 genes into basic categories. ClueGO [86] with the hypergeometric test and a  
14  
15 615 Bonferroni adjustment were performed to enrich the KEGG pathways [87].  
16  
17  
18  
19  
20  
21

22 616

### 23 617 **Mitochondrial genome assembly**

24 618 Geneious (version 8.1.5) [88] was utilized with the default settings to assemble the  
25  
26 619 whole mitochondrial genome. First, the reads were mapped to the 4 available  
27  
28 620 *Syrmaticus* mitochondrial genomes from GenBank (AB164622.1 - AB164625.1). The  
29  
30 621 mapped reads were collected and then used for the further assembly of the  
31  
32 622 mitochondrial genome of the Mikado pheasant. The genes were identified using  
33  
34 623 MITOS [89] and curated by comparison with known sequences of other long-tailed  
35  
36 624 pheasants from GenBank. The phylogenetic reconstruction and estimation of the  
37  
38 625 divergence times among the 5 long-tailed pheasants were achieved using BEAST with  
39  
40 626 the GTR+G model, which was selected as the best nucleotide substitution model by  
41  
42 627 Modeltest and PAUP\*. We added 2 nodes as the fossil calibration points according to  
43  
44 628 the TimeTree database, including Elliot's pheasant-Reeves's pheasant (11.1 Mya) and  
45  
46 629 Elliot's pheasant-Mrs. Hume's pheasant (0.2 Mya). A calibrated Yule speciation  
47  
48 630 process was implemented in the analysis using BEAST. In the Markov chain Monte  
49  
50  
51  
52  
53 631 Carlo analysis, the chain length utilized 10 million generations.  
54  
55  
56  
57  
58  
59  
60  
61  
62  
63  
64  
65

1 633 **Additional files**

2  
3 634 Additional file 1: Supplementary figures S1-S11 and supplementary tables S1-S7, S9,  
4  
5 635 S12, S15, and S17-S18.

6  
7 636 Additional file 2: Supplementary tables S8, S10-S11, S13-S14, and S16.

8  
9  
10 637

11  
12 638 **List of abbreviations**

13  
14  
15 639 FDR: false discovery rate; GO: Gene Ontology; IUCN: International Union for  
16  
17 640 Conservation of Nature; LRT: likelihood ratio test; MHC: major histocompatibility  
18  
19 641 complex; Mya: million years ago; NR: non-redundant; PSG: positively selected gene.  
20  
21

22 642

23  
24  
25 643 **Availability of supporting data**

26  
27  
28  
29 644 Data for the *Syrmaticus mikado* genome has been deposited in the  
30  
31 645 GenBank/EMBL/DDBJ Bioproject database under the project number PRJNA389983.  
32  
33  
34 646 Raw genomic and transcriptomic sequence datasets were deposited in Sequence Read  
35  
36 647 Archive (SRA) under the accession code SRP108966.  
37

38  
39 648

40  
41 649 **Competing interests**

42  
43 650 The authors declare that they have no competing interests.  
44  
45

46 651

47  
48 652 **Funding**

49  
50 653 This work was supported by grant from Taipei Zoo (No. 13, 2015 Animal Adoption  
51  
52 654 Programs of Taipei Zoo). The funder had no role in the design, collection, analysis, or  
53  
54  
55 655 interpretation of the data; writing the manuscript; or the decision to submit the  
56  
57  
58 656 manuscript for publication.  
59

60 657

1 658 **Acknowledgements**

2  
3 659 We thank Dr. Mei-Yeh Lu and the High Throughput Genomics Core at the  
4  
5 660 Biodiversity Research Center, Academia Sinica, for the NGS library constructions  
6  
7 661 and Illumina sequencing. We are also grateful to the Computer and Information  
8  
9  
10 662 Networking Center, National Taiwan University, and the National Center for  
11  
12 663 High-performance Computing for the support of the high-performance computing  
13  
14 664 facilities. We thank Dr. Chih-Ming Hung and Dr. Chen Siang Ng for discussion and  
15  
16  
17 665 comments on the phylogenetic analysis, Dr. Chia-Yang Cheng for assistance in data  
18  
19 666 analyses, Dr. Melissa Stauffer and Dr. Yao-Yin Chang for assistance with editing the  
20  
21  
22 667 manuscript, and Yu-Cheng Hsieh for providing photos of the Mikado pheasant.  
23  
24  
25

26 668  
27 669 **Author Contributions**

28  
29 670 E.Y.C., C.-Y.C., M.-H.T., S.-T.D., and H.L. conceived the project. E.Y.C., C.-Y.C.,  
30  
31 671 M.-H.T., and E.-C.L. managed and coordinated the project. M.-H.T., S.-T.D., and  
32  
33 672 E.-C.L. performed animal work and prepared biological samples. T.-P.L. and L.-C.L.  
34  
35 673 designed bioinformatics and evolutionary analyses. C.-Y.L., P.-H.H., and K.-Y.L.  
36  
37 674 performed genome assembly. P.-H.H. performed assessment of the assembly quality.  
38  
39 675 C.-Y.L. and P.-H.H. performed gene prediction and annotation. C.-Y.L. and L.-M.C.  
40  
41 676 performed evolutionary analysis. C.-Y.L. performed mitochondrial genome assembly  
42  
43 677 and gene annotation, and curated the MHC-B gene loci. Y.-F.L. wrote a visualization  
44  
45 678 program for displaying MHC-B genes. C.-Y.L., P.-H.H., and A.C. wrote the  
46  
47  
48 679 manuscript. A.C., M.-H.T., and C.-Y.C. commented on the draft and revised the  
49  
50  
51 680 manuscript. All authors read and approved the final manuscript.  
52  
53  
54  
55

56 681  
57  
58  
59  
60  
61  
62  
63  
64  
65

682 **References**

- 683 1. Bridgman CL. Habitat use, distribution and conservation status of the mikado  
684 pheasant (*Syrmaticus mikado*) in Taiwan. The University of Tennessee; 2002.
- 685 2. Severinghaus SR. A study of the Swinhoe's and Mikado pheasants in Taiwan  
686 with recommendations for their conservation. Cornell University, May; 1977.
- 687 3. McGowan PJ and Garson PJ. Pheasants: status survey and conservation action  
688 plan 1995-1999. IUCN; 1995.
- 689 4. Fuller RA. Pheasants: status survey and conservation action plan 2000-2004.  
690 IUCN; 2000.
- 691 5. Li R, Fan W, Tian G, Zhu H, He L, Cai J, et al. The sequence and de novo  
692 assembly of the giant panda genome. *Nature*. 2010;463 7279:311-7.  
693 doi:10.1038/nature08696.
- 694 6. Hung CM, Shaner PJ, Zink RM, Liu WC, Chu TC, Huang WS, et al. Drastic  
695 population fluctuations explain the rapid extinction of the passenger pigeon.  
696 *Proceedings of the National Academy of Sciences of the United States of*  
697 *America*. 2014;111 29:10636-41. doi:10.1073/pnas.1401526111.
- 698 7. Li S, Li B, Cheng C, Xiong Z, Liu Q, Lai J, et al. Genomic signatures of  
699 near-extinction and rebirth of the crested ibis and other endangered bird  
700 species. *Genome biology*. 2014;15 12:557. doi:10.1186/s13059-014-0557-1.
- 701 8. Le Duc D, Renaud G, Krishnan A, Almen MS, Huynen L, Prohaska SJ, et al.  
702 Kiwi genome provides insights into evolution of a nocturnal lifestyle. *Genome*  
703 *biology*. 2015;16:147. doi:10.1186/s13059-015-0711-4.
- 704 9. Yu L, Wang GD, Ruan J, Chen YB, Yang CP, Cao X, et al. Genomic analysis  
705 of snub-nosed monkeys (*Rhinopithecus*) identifies genes and processes related  
706 to high-altitude adaptation. *Nat Genet*. 2016;48 8:947-52.  
707 doi:10.1038/ng.3615.
- 708 10. Zhan XJ and Zhang ZW. Molecular phylogeny of avian genus *Syrmaticus*  
709 based on the mitochondrial cytochrome B gene and control region. *Zoolog Sci*.  
710 2005;22 4:427-35. doi:10.2108/zsj.22.427.
- 711 11. Lee P, Lue K, Hsieh J, Lee Y, Pan Y, Chen H, et al. A wildlife distribution  
712 database in Taiwan. Council of Agriculture, Taipei. 1998.
- 713 12. Chikhi R and Medvedev P. Informed and automated k-mer size selection for  
714 genome assembly. *Bioinformatics*. 2014;30 1:31-7.  
715 doi:10.1093/bioinformatics/btt310.
- 716 13. Zimin AV, Marcais G, Puiu D, Roberts M, Salzberg SL and Yorke JA. The  
717 MaSuRCA genome assembler. *Bioinformatics*. 2013;29 21:2669-77.  
718 doi:10.1093/bioinformatics/btt476.

- 1  
2  
3  
4  
5  
6  
7  
8  
9  
10  
11  
12  
13  
14  
15  
16  
17  
18  
19  
20  
21  
22  
23  
24  
25  
26  
27  
28  
29  
30  
31  
32  
33  
34  
35  
36  
37  
38  
39  
40  
41  
42  
43  
44  
45  
46  
47  
48  
49  
50  
51  
52  
53  
54  
55  
56  
57  
58  
59  
60  
61  
62  
63  
64  
65
- 719 14. Smit AF, Hubley R and Green P. RepeatMasker Open-3.0. 1996.  
720 15. Stanke M, Diekhans M, Baertsch R and Haussler D. Using native and  
721 syntenically mapped cDNA alignments to improve de novo gene finding.  
722 *Bioinformatics*. 2008;24 5:637-44.  
723 16. Haas BJ, Salzberg SL, Zhu W, Pertea M, Allen JE, Orvis J, et al. Automated  
724 eukaryotic gene structure annotation using EVIDENCEModeler and the Program  
725 to Assemble Spliced Alignments. *Genome biology*. 2008;9 1:R7.  
726 doi:10.1186/gb-2008-9-1-r7.  
727 17. Zhang G, Li B, Li C, Gilbert MT, Jarvis ED, Wang J, et al. Comparative  
728 genomic data of the Avian Phylogenomics Project. *Gigascience*. 2014;3 1:26.  
729 doi:10.1186/2047-217X-3-26.  
730 18. Lee C-Y, Chiu Y-C, Wang L-B, Kuo Y-L, Chuang EY, Lai L-C, et al.  
731 Common applications of next-generation sequencing technologies in genomic  
732 research. *Translational cancer research*. 2013;2 1:33-45.  
733 19. Simao FA, Waterhouse RM, Ioannidis P, Kriventseva EV and Zdobnov EM.  
734 BUSCO: assessing genome assembly and annotation completeness with  
735 single-copy orthologs. *Bioinformatics*. 2015;31 19:3210-2.  
736 doi:10.1093/bioinformatics/btv351.  
737 20. Kurtz S, Phillippy A, Delcher AL, Smoot M, Shumway M, Antonescu C, et al.  
738 Versatile and open software for comparing large genomes. *Genome biology*.  
739 2004;5 2:R12. doi:10.1186/gb-2004-5-2-r12.  
740 21. Li L, Stoeckert CJ, Jr. and Roos DS. OrthoMCL: identification of ortholog  
741 groups for eukaryotic genomes. *Genome research*. 2003;13 9:2178-89.  
742 doi:10.1101/gr.1224503.  
743 22. Drummond AJ, Suchard MA, Xie D and Rambaut A. Bayesian phylogenetics  
744 with BEAUti and the BEAST 1.7. *Mol Biol Evol*. 2012;29 8:1969-73.  
745 doi:10.1093/molbev/mss075.  
746 23. Lu L, Chen Y, Wang Z, Li X, Chen W, Tao Z, et al. The goose genome  
747 sequence leads to insights into the evolution of waterfowl and susceptibility to  
748 fatty liver. *Genome biology*. 2015;16:89. doi:10.1186/s13059-015-0652-y.  
749 24. Jiang L, Wang G, Peng R, Peng Q and Zou F. Phylogenetic and molecular  
750 dating analysis of Taiwan Blue Pheasant (*Lophura swinhoii*). *Gene*. 2014;539  
751 1:21-9. doi:10.1016/j.gene.2014.01.067.  
752 25. Cai Q, Qian X, Lang Y, Luo Y, Xu J, Pan S, et al. Genome sequence of  
753 ground tit *Pseudopodoces humilis* and its adaptation to high altitude. *Genome*  
754 *biology*. 2013;14 3:R29. doi:10.1186/gb-2013-14-3-r29.

- 1  
2  
3  
4  
5  
6  
7  
8  
9  
10  
11  
12  
13  
14  
15  
16  
17  
18  
19  
20  
21  
22  
23  
24  
25  
26  
27  
28  
29  
30  
31  
32  
33  
34  
35  
36  
37  
38  
39  
40  
41  
42  
43  
44  
45  
46  
47  
48  
49  
50  
51  
52  
53  
54  
55  
56  
57  
58  
59  
60  
61  
62  
63  
64  
65
- 755 26. Finn RD, Mistry J, Tate J, Coghill P, Heger A, Pollington JE, et al. The Pfam  
756 protein families database. *Nucleic Acids Res.* 2010;38 Database  
757 issue:D211-22. doi:10.1093/nar/gkp985.
- 758 27. Wang B, Ekblom R, Strand TM, Portela-Bens S and Hoglund J. Sequencing of  
759 the core MHC region of black grouse (*Tetrao tetrix*) and comparative  
760 genomics of the galliform MHC. *BMC Genomics.* 2012;13:553.  
761 doi:10.1186/1471-2164-13-553.
- 762 28. Kaufman J, Milne S, Gobel TW, Walker BA, Jacob JP, Auffray C, et al. The  
763 chicken B locus is a minimal essential major histocompatibility complex.  
764 *Nature.* 1999;401 6756:923-5. doi:10.1038/44856.
- 765 29. Kaufman J, Volk H and Wallny HJ. A "minimal essential Mhc" and an  
766 "unrecognized Mhc": two extremes in selection for polymorphism. *Immunol*  
767 *Rev.* 1995;143:63-88.
- 768 30. Shiina T, Briles WE, Goto RM, Hosomichi K, Yanagiya K, Shimizu S, et al.  
769 Extended gene map reveals tripartite motif, C-type lectin, and Ig superfamily  
770 type genes within a subregion of the chicken MHC-B affecting infectious  
771 disease. *J Immunol.* 2007;178 11:7162-72.
- 772 31. Lee E, Helt GA, Reese JT, Munoz-Torres MC, Childers CP, Buels RM, et al.  
773 Web Apollo: a web-based genomic annotation editing platform. *Genome*  
774 *biology.* 2013;14 8:R93. doi:10.1186/gb-2013-14-8-r93.
- 775 32. Chaves LD, Krueth SB and Reed KM. Defining the turkey MHC: sequence  
776 and genes of the B locus. *J Immunol.* 2009;183 10:6530-7.  
777 doi:10.4049/jimmunol.0901310.
- 778 33. Wang N, Kimball RT, Braun EL, Liang B and Zhang Z. Assessing  
779 phylogenetic relationships among galliformes: a multigene phylogeny with  
780 expanded taxon sampling in Phasianidae. *PLoS One.* 2013;8 5:e64312.  
781 doi:10.1371/journal.pone.0064312.
- 782 34. Powell FL, Shams H, Hempleman SC and Mitchell GS. Breathing in thin air:  
783 acclimatization to altitude in ducks. *Respir Physiol Neurobiol.* 2004;144  
784 2-3:225-35. doi:10.1016/j.resp.2004.07.021.
- 785 35. Monge C and Leon-Velarde F. Physiological adaptation to high altitude:  
786 oxygen transport in mammals and birds. *Physiol Rev.* 1991;71 4:1135-72.
- 787 36. Weber RE, Jessen TH, Malte H and Tame J. Mutant hemoglobins (alpha  
788 119-Ala and beta 55-Ser): functions related to high-altitude respiration in  
789 geese. *J Appl Physiol (1985).* 1993;75 6:2646-55.
- 790 37. Jessen TH, Weber RE, Fermi G, Tame J and Braunitzer G. Adaptation of bird  
791 hemoglobins to high altitudes: demonstration of molecular mechanism by



- 792 protein engineering. Proceedings of the National Academy of Sciences of the  
793 United States of America. 1991;88 15:6519-22.
- 794 38. McCracken KG, Barger CP and Sorenson MD. Phylogenetic and structural  
795 analysis of the HbA (alphaA/betaA) and HbD (alphaD/betaA) hemoglobin  
796 genes in two high-altitude waterfowl from the Himalayas and the Andes:  
797 Bar-headed goose (*Anser indicus*) and Andean goose (*Chloephaga*  
798 *melanoptera*). *Mol Phylogenet Evol.* 2010;56 2:649-58.  
799 doi:10.1016/j.ympev.2010.04.034.
- 800 39. Gnerre S, Maccallum I, Przybylski D, Ribeiro FJ, Burton JN, Walker BJ, et al.  
801 High-quality draft assemblies of mammalian genomes from massively parallel  
802 sequence data. Proceedings of the National Academy of Sciences of the  
803 United States of America. 2011;108 4:1513-8. doi:10.1073/pnas.1017351108.
- 804 40. Chu TC, Lu CH, Liu T, Lee GC, Li WH and Shih AC. Assembler for de novo  
805 assembly of large genomes. Proceedings of the National Academy of Sciences  
806 of the United States of America. 2013;110 36:E3417-24.  
807 doi:10.1073/pnas.1314090110.
- 808 41. Margulies M, Egholm M, Altman WE, Attiya S, Bader JS, Bemben LA, et al.  
809 Genome sequencing in microfabricated high-density picolitre reactors. *Nature.*  
810 2005;437 7057:376-80. doi:10.1038/nature03959.
- 811 42. Simpson JT and Durbin R. Efficient de novo assembly of large genomes using  
812 compressed data structures. *Genome research.* 2012;22 3:549-56.  
813 doi:10.1101/gr.126953.111.
- 814 43. Luo R, Liu B, Xie Y, Li Z, Huang W, Yuan J, et al. SOAPdenovo2: an  
815 empirically improved memory-efficient short-read de novo assembler.  
816 *Gigascience.* 2012;1 1:18. doi:10.1186/2047-217X-1-18.
- 817 44. Eo SH, Bininda-Emonds OR and Carroll JP. A phylogenetic supertree of the  
818 fowls (*Galloanserae*, *Aves*). *Zoologica Scripta.* 2009;38 5:465-81.
- 819 45. Kimball RT, Mary CM and Braun EL. A macroevolutionary perspective on  
820 multiple sexual traits in the phasianidae (*galliformes*). *Int J Evol Biol.*  
821 2011;2011:423938. doi:10.4061/2011/423938.
- 822 46. Dunn CW, Hejnal A, Matus DQ, Pang K, Browne WE, Smith SA, et al. Broad  
823 phylogenomic sampling improves resolution of the animal tree of life. *Nature.*  
824 2008;452 7188:745-9. doi:10.1038/nature06614.
- 825 47. Naylor GJ and Brown WM. Structural biology and phylogenetic estimation.  
826 *Nature.* 1997;388 6642:527-8. doi:10.1038/41460.
- 827 48. Rosenberg MS and Kumar S. Incomplete taxon sampling is not a problem for  
828 phylogenetic inference. Proceedings of the National Academy of Sciences of

- 1 829 the United States of America. 2001;98 19:10751-6.  
2 830 doi:10.1073/pnas.191248498.
- 3 831 49. Li M, Tian S, Jin L, Zhou G, Li Y, Zhang Y, et al. Genomic analyses identify  
4 832 distinct patterns of selection in domesticated pigs and Tibetan wild boars. *Nat*  
5 833 *Genet.* 2013;45 12:1431-8. doi:10.1038/ng.2811.
- 6 834 50. Zhang B, Qiangba Y, Shang P, Wang Z, Ma J, Wang L, et al. A  
7 835 Comprehensive MicroRNA Expression Profile Related to Hypoxia Adaptation  
8 836 in the Tibetan Pig. *PLoS One.* 2015;10 11:e0143260.  
9 837 doi:10.1371/journal.pone.0143260.
- 10 838 51. Hsu F and Mao Y. The structure of phosphoinositide phosphatases: Insights  
11 839 into substrate specificity and catalysis. *Biochim Biophys Acta.* 2015;1851  
12 840 6:698-710. doi:10.1016/j.bbali.2014.09.015.
- 13 841 52. Rapoport SI, Primiani CT, Chen CT, Ahn K and Ryan VH. Coordinated  
14 842 Expression of Phosphoinositide Metabolic Genes during Development and  
15 843 Aging of Human Dorsolateral Prefrontal Cortex. *PLoS One.* 2015;10  
16 844 7:e0132675. doi:10.1371/journal.pone.0132675.
- 17 845 53. Tan J, Yu CY, Wang ZH, Chen HY, Guan J, Chen YX, et al. Genetic variants  
18 846 in the inositol phosphate metabolism pathway and risk of different types of  
19 847 cancer. *Sci Rep.* 2015;5:8473. doi:10.1038/srep08473.
- 20 848 54. Zhu L, Li M, Li X, Shuai S, Liu H, Wang J, et al. Distinct expression patterns  
21 849 of genes associated with muscle growth and adipose deposition in tibetan pigs:  
22 850 a possible adaptive mechanism for high altitude conditions. *High Alt Med Biol.*  
23 851 2009;10 1:45-55. doi:10.1089/ham.2008.1042.
- 24 852 55. Ullrich SE and Schmitt DA. The role of cytokines in UV-induced systemic  
25 853 immune suppression. *Journal of dermatological science.* 2000;23 Suppl  
26 854 1:S10-2.
- 27 855 56. Baadsgaard O, Fox DA and Cooper KD. Human epidermal cells from  
28 856 ultraviolet light-exposed skin preferentially activate autoreactive CD4+2H4+  
29 857 suppressor-inducer lymphocytes and CD8+ suppressor/cytotoxic lymphocytes.  
30 858 *J Immunol.* 1988;140 6:1738-44.
- 31 859 57. Bollmer JL, Vargas FH and Parker PG. Low MHC variation in the endangered  
32 860 Galapagos penguin (*Spheniscus mendiculus*). *Immunogenetics.* 2007;59  
33 861 7:593-602. doi:10.1007/s00251-007-0221-y.
- 34 862 58. Wan QH, Zhu L, Wu H and Fang SG. Major histocompatibility complex class  
35 863 II variation in the giant panda (*Ailuropoda melanoleuca*). *Mol Ecol.* 2006;15  
36 864 9:2441-50. doi:10.1111/j.1365-294X.2006.02966.x.
- 37 865 59. Zeng QQ, Zhong GH, He K, Sun DD and Wan QH. Molecular  
38 866 characterization of classical and nonclassical MHC class I genes from the

- 1 867 golden pheasant (*Chrysolophus pictus*). *Int J Immunogenet.* 2016;43 1:8-17.  
2 868 doi:10.1111/iji.12245.
- 3 869 60. Kan XZ, Yang JK, Li XF, Chen L, Lei ZP, Wang M, et al. Phylogeny of major  
4 870 lineages of galliform birds (Aves: Galliformes) based on complete  
5 871 mitochondrial genomes. *Genet Mol Res.* 2010;9 3:1625-33.  
6 872 doi:10.4238/vol9-3gmr898.
- 7 873 61. Nishibori M, Shimogiri T, Hayashi T and Yasue H. Molecular evidence for  
8 874 hybridization of species in the genus *Gallus* except for *Gallus varius*. *Anim*  
9 875 *Genet.* 2005;36 5:367-75. doi:10.1111/j.1365-2052.2005.01318.x.
- 10 876 62. Liu T-K, Chen Y-G, Chen W-S and Jiang S-H. Rates of cooling and  
11 877 denudation of the Early Penglai Orogeny, Taiwan, as assessed by fission-track  
12 878 constraints. *Tectonophysics.* 2000;320 1:69-82.
- 13 879 63. Osozawa S, Shinjo R, Armid A, Watanabe Y, Horiguchi T and Wakabayashi J.  
14 880 Palaeogeographic reconstruction of the 1.55 Ma synchronous isolation of the  
15 881 Ryukyu Islands, Japan, and Taiwan and inflow of the Kuroshio warm current.  
16 882 *International Geology Review.* 2012;54 12:1369-88.
- 17 883 64. Boetzer M, Henkel CV, Jansen HJ, Butler D and Pirovano W. Scaffolding  
18 884 pre-assembled contigs using SSPACE. *Bioinformatics.* 2011;27 4:578-9.  
19 885 doi:10.1093/bioinformatics/btq683.
- 20 886 65. Gurevich A, Saveliev V, Vyahhi N and Tesler G. QUAST: quality assessment  
21 887 tool for genome assemblies. *Bioinformatics.* 2013;29 8:1072-5.  
22 888 doi:10.1093/bioinformatics/btt086.
- 23 889 66. Langmead B and Salzberg SL. Fast gapped-read alignment with Bowtie 2. *Nat*  
24 890 *Methods.* 2012;9 4:357-9. doi:10.1038/nmeth.1923.
- 25 891 67. Kim D, Pertea G, Trapnell C, Pimentel H, Kelley R and Salzberg SL. TopHat2:  
26 892 accurate alignment of transcriptomes in the presence of insertions, deletions  
27 893 and gene fusions. *Genome biology.* 2013;14 4:R36.  
28 894 doi:10.1186/gb-2013-14-4-r36.
- 29 895 68. Quinlan AR and Hall IM. BEDTools: a flexible suite of utilities for comparing  
30 896 genomic features. *Bioinformatics.* 2010;26 6:841-2.  
31 897 doi:10.1093/bioinformatics/btq033.
- 32 898 69. Krzywinski M, Schein J, Birol I, Connors J, Gascoyne R, Horsman D, et al.  
33 899 *Circos*: an information aesthetic for comparative genomics. *Genome Res.*  
34 900 2009;19 9:1639-45. doi:10.1101/gr.092759.109.
- 35 901 70. Slater GS and Birney E. Automated generation of heuristics for biological  
36 902 sequence comparison. *BMC Bioinformatics.* 2005;6:31.  
37 903 doi:10.1186/1471-2105-6-31.

- 1  
2  
3  
4  
5  
6  
7  
8  
9  
10  
11  
12  
13  
14  
15  
16  
17  
18  
19  
20  
21  
22  
23  
24  
25  
26  
27  
28  
29  
30  
31  
32  
33  
34  
35  
36  
37  
38  
39  
40  
41  
42  
43  
44  
45  
46  
47  
48  
49  
50  
51  
52  
53  
54  
55  
56  
57  
58  
59  
60  
61  
62  
63  
64  
65
- 904 71. Grabherr MG, Haas BJ, Yassour M, Levin JZ, Thompson DA, Amit I, et al.  
905 Full-length transcriptome assembly from RNA-Seq data without a reference  
906 genome. *Nature biotechnology*. 2011;29 7:644-52. doi:10.1038/nbt.1883.
- 907 72. Haas BJ, Delcher AL, Mount SM, Wortman JR, Smith RK, Jr., Hannick LI, et  
908 al. Improving the Arabidopsis genome annotation using maximal transcript  
909 alignment assemblies. *Nucleic Acids Res*. 2003;31 19:5654-66.
- 910 73. Eddy SR. Profile hidden Markov models. *Bioinformatics*. 1998;14 9:755-63.
- 911 74. Holt C and Yandell M. MAKER2: an annotation pipeline and  
912 genome-database management tool for second-generation genome projects.  
913 *BMC Bioinformatics*. 2011;12:491. doi:10.1186/1471-2105-12-491.
- 914 75. Edgar RC. MUSCLE: multiple sequence alignment with high accuracy and  
915 high throughput. *Nucleic Acids Res*. 2004;32 5:1792-7.  
916 doi:10.1093/nar/gkh340.
- 917 76. Castresana J. Selection of conserved blocks from multiple alignments for their  
918 use in phylogenetic analysis. *Mol Biol Evol*. 2000;17 4:540-52.
- 919 77. Stamatakis A. RAxML version 8: a tool for phylogenetic analysis and  
920 post-analysis of large phylogenies. *Bioinformatics*. 2014;30 9:1312-3.  
921 doi:10.1093/bioinformatics/btu033.
- 922 78. Posada D. Using MODELTEST and PAUP\* to select a model of nucleotide  
923 substitution. *Current protocols in bioinformatics / editorial board, Andreas D*  
924 *Baxevanis [et al]*. 2003;Chapter 6:Unit 6 5.  
925 doi:10.1002/0471250953.bi0605s00.
- 926 79. Hedges SB, Dudley J and Kumar S. TimeTree: a public knowledge-base of  
927 divergence times among organisms. *Bioinformatics*. 2006;22 23:2971-2.  
928 doi:10.1093/bioinformatics/btl505.
- 929 80. Bell MA and Lloyd GT. Strap: an R package for plotting phylogenies against  
930 stratigraphy and assessing their stratigraphic congruence. *Palaeontology*.  
931 2015;58 2:379-89.
- 932 81. Han MV, Thomas GW, Lugo-Martinez J and Hahn MW. Estimating gene gain  
933 and loss rates in the presence of error in genome assembly and annotation  
934 using CAFE 3. *Mol Biol Evol*. 2013;30 8:1987-97.  
935 doi:10.1093/molbev/mst100.
- 936 82. Yang Z. PAML 4: phylogenetic analysis by maximum likelihood. *Mol Biol*  
937 *Evol*. 2007;24 8:1586-91. doi:10.1093/molbev/msm088.
- 938 83. Bleazard T, Lamb JA and Griffiths-Jones S. Bias in microRNA functional  
939 enrichment analysis. *Bioinformatics*. 2015;31 10:1592-8.  
940 doi:10.1093/bioinformatics/btv023.

- 1  
2  
3  
4  
5  
6  
7  
8  
9  
10  
11  
12  
13  
14  
15  
16  
17  
18  
19  
20  
21  
22  
23  
24  
25  
26  
27  
28  
29  
30  
31  
32  
33  
34  
35  
36  
37  
38  
39  
40  
41  
42  
43  
44  
45  
46  
47  
48  
49  
50  
51  
52  
53  
54  
55  
56  
57  
58  
59  
60  
61  
62  
63  
64  
65
- 941 84. Lu TP, Lee CY, Tsai MH, Chiu YC, Hsiao CK, Lai LC, et al. miRSystem: an  
942 integrated system for characterizing enriched functions and pathways of  
943 microRNA targets. PLoS One. 2012;7 8:e42390.  
944 doi:10.1371/journal.pone.0042390.
- 945 85. Bao J and Reecy JM. CateGORizer: a web-based program to batch analyze  
946 gene ontology classification categories. Online Journal of Bioinformatics.  
947 2008;9 2:108-12.
- 948 86. Bindea G, Mlecnik B, Hackl H, Charoentong P, Tosolini M, Kirilovsky A, et  
949 al. ClueGO: a Cytoscape plug-in to decipher functionally grouped gene  
950 ontology and pathway annotation networks. Bioinformatics. 2009;25 8:1091-3.  
951 doi:10.1093/bioinformatics/btp101.
- 952 87. Kanehisa M and Goto S. KEGG: kyoto encyclopedia of genes and genomes.  
953 Nucleic Acids Res. 2000;28 1:27-30.
- 954 88. Kears M, Moir R, Wilson A, Stones-Havas S, Cheung M, Sturrock S, et al.  
955 Geneious Basic: an integrated and extendable desktop software platform for  
956 the organization and analysis of sequence data. Bioinformatics. 2012;28  
957 12:1647-9. doi:10.1093/bioinformatics/bts199.
- 958 89. Bernt M, Donath A, Juhling F, Externbrink F, Florentz C, Fritzs G, et al.  
959 MITOS: improved de novo metazoan mitochondrial genome annotation. Mol  
960 Phylogenet Evol. 2013;69 2:313-9. doi:10.1016/j.ympev.2012.08.023.
- 961

1 **962 Figure Legends**

2  
3  
4 **963 Figure 1:** A chromosome-level comparison of the Mikado pheasant and the chicken.

5  
6 **964 (A)** A syntenic map of the Mikado pheasant and chicken genomes. The x-axis  
7  
8 specifies the chromosome position in the chicken, whereas the y-axis specifies the  
9  
10 scaffold position in the Mikado pheasant. The red dots (or lines) indicate that the  
11  
12 sequences were aligned in the same orientation, and the blue dots indicate an  
13  
14 alignment with a reverse complement. **(B)** A chord diagram of scaffolds with a total  
15  
16 length greater than 500 kb and an alignment length greater than 10 kb. The orange  
17  
18 perimeters specify the chromosomes of the chicken, whereas the purple perimeters  
19  
20 specify the scaffolds of the Mikado pheasant. The red links represent the sequences  
21  
22 aligned in the same orientation, and the blue links represent an alignment with a  
23  
24 reverse complement.  
25  
26  
27  
28  
29

30 **974 Figure 2:** Evolution of gene families among various animal species. A phylogenetic  
31  
32 tree was reconstructed based on 5287 single-copy orthologs of 10 species. The most  
33  
34 recent common ancestor (MRCA) contains 18 220 gene families that were used to  
35  
36 examine gene families with expansions or contractions. The numbers of gene families  
37  
38 with significant expansions and contractions are shown in red and blue, respectively,  
39  
40 at each branch. The divergence times and associated 95% confidence intervals (in  
41  
42 parentheses) are indicated at the nodes of the tree in Mya. All nodes had 100%  
43  
44 support in 500 bootstrap replicates.  
45  
46  
47  
48

49 **982 Figure 3:** An identity plot of the MHC regions of the Mikado pheasant and the  
50  
51 chicken. The chicken MHC sequence was downloaded from GenBank (AB268588).  
52  
53 Its nucleotide sequence from 17 978 to 241 251 was aligned against the Mikado  
54  
55 pheasant MHC sequence from 2615 to 229 500 in scaffold208. The boxes on the  
56  
57 horizontal and vertical axes, respectively, represent the gene loci in the Mikado  
58  
59  
60  
61  
62  
63  
64  
65

1 987 pheasant and the chicken. Boxes with different sizes exhibit different gene locus sizes,  
2  
3 988 and red/blue coloring indicate genes in forward/reverse orientation. The red dots (or  
4  
5 989 lines) on the diagonal indicate that the sequences were aligned in the same orientation,  
6  
7 990 whereas the blue dots indicate alignments with reverse complements. The green  
8  
9  
10 991 dotted lines highlight the sequence of the inverted *TAPBP* locus and *TAPI-TAP2*  
11  
12 992 block. The orange peaks show the read counts of the gene expression based on our  
13  
14 993 RNA-Seq data. Those with more than 10 000 read counts were scaled to 10 000.  
15  
16  
17 994 **Figure 4:** A phylogenetic tree of *Syrmaticus* pheasants. The divergence times and  
18  
19 995 associated 95% confidence intervals shown in parentheses are given at the branch  
20  
21  
22 996 nodes of the tree in Mya.  
23  
24 997  
25  
26  
27  
28  
29  
30  
31  
32  
33  
34  
35  
36  
37  
38  
39  
40  
41  
42  
43  
44  
45  
46  
47  
48  
49  
50  
51  
52  
53  
54  
55  
56  
57  
58  
59  
60  
61  
62  
63  
64  
65

998 **Tables**

**Table 1:** DNA contigs and scaffolds from the genomic data of the Mikado pheasant.

|                  | <b>Contigs</b> | <b>Scaffolds</b> |
|------------------|----------------|------------------|
| Total length     | 1 054 607 905  | 1 035 950 077    |
| Maximum length   | 195 342        | 50 275 205       |
| Number of Ns     | 0              | 19 577 507       |
| Average length   | 5050           | 110 690          |
| N50*             | 13 461         | 11 324 524       |
| N75*             | 6528           | 5 708 287        |
| L50 <sup>†</sup> | 22 195         | 28               |
| L75 <sup>†</sup> | 50 081         | 59               |
| Counts > 300 bp  | 208 810        | -                |
| Counts > 1 kb    | 123 006        | 9359             |
| Counts > 5 kb    | 61 237         | 1489             |
| Counts > 10 kb   | 32 868         | 928              |

\* The N50/N75 length is defined as the shortest sequence length at 50%/75% of the genome.

<sup>†</sup> The L50/L75 count is defined as the smallest number of contigs (or scaffolds) that those length sum produces N50/N75.

999



**Table 2:** Coding sequences of MHC-B genes in the Mikado pheasant and comparisons with the chicken.

| Gene     | Position      | Strand | Gene length | Amino acid length | Exon | Aligned base | Nucleotide identity (%) | Aligned amino acid | Amino acid identity (%) | Amino acid substitutions | d <sub>N</sub> /d <sub>S</sub> * |
|----------|---------------|--------|-------------|-------------------|------|--------------|-------------------------|--------------------|-------------------------|--------------------------|----------------------------------|
| KIF51    | 2615-5304     | +      | 1140        | 380               | 7    | 1131         | 91.76                   | 377                | 90.53                   | 33                       | 0.8669                           |
| Blec3    | 8997-11221    | -      | 552         | 183               | 5    | 507          | 82.43                   | 168                | 78.14                   | 25                       | 0.3821                           |
| Bzfp3    | 12126-18213   | +      | 1449        | 482               | 13   | 1569         | 85.8                    | 522                | 83.62                   | 40                       | 0.1884                           |
| TRIM7.2  | 19507-24562   | -      | 1518        | 505               | 7    | 1518         | 95.98                   | 505                | 98.61                   | 7                        | 0.0391                           |
| Bzfp2*   | 27027-29946   | +      | 1368        | 455               | 4    | 1396         | 70.41                   | N/A                | N/A                     | N/A                      | 0.2438                           |
| Bzfp1    | 31049-33298   | -      | 1425        | 474               | 2    | 1426         | 88.23                   | 471                | 86.79                   | 54                       | 0.1900                           |
| 44C24.1  | 37266-37673   | -      | 408         | 136               | 1    | 408          | 85.78                   | 136                | 80.15                   | 27                       | 0.2762                           |
| IL15     | 42730-46759   | +      | 1578        | 525               | 6    | 1572         | 92.25                   | 523                | 93.75                   | 25                       | 0.1011                           |
| TRIM7.1  | 51325-62131   | -      | 1758        | 585               | 8    | 1767         | 92.49                   | 588                | 92.69                   | 40                       | 0.1545                           |
| HER1     | 63362-64247   | -      | 324         | 107               | 3    | 324          | 93.52                   | 107                | 91.59                   | 9                        | 0.2148                           |
| TRIM39.2 | 70980-74640   | -      | 1392        | 464               | 6    | 1389         | 93.68                   | 463                | 94.61                   | 24                       | 0.1167                           |
| TRIM27.2 | 76988-80522   | +      | 1431        | 476               | 7    | 1431         | 94.13                   | 476                | 92.23                   | 37                       | 0.2415                           |
| TRIM39.1 | 81560-85449   | -      | 798         | 266               | 5    | 798          | 93.23                   | 266                | 91.35                   | 23                       | 0.2753                           |
| TRIM27.1 | 86518-90228   | -      | 1485        | 495               | 7    | 1485         | 94.48                   | 495                | 94.34                   | 28                       | 0.1715                           |
| TRIM41   | 91918-96605   | +      | 1656        | 551               | 7    | 1770         | 89.58                   | 589                | 91.71                   | 7                        | 0.0375                           |
| GNB2L1   | 98038-101512  | -      | 954         | 317               | 8    | 954          | 96.86                   | 317                | 100                     | 0                        | N/A                              |
| BFN1     | 103411-114264 | +      | 930         | 309               | 8    | 939          | 74.64                   | 339                | 57.26                   | 96                       | 0.8357                           |
| BFN2     | 117466-120157 | +      | 1461        | 487               | 7    | 1481         | 90.41                   | 469                | 83.37                   | 52                       | 0.3996                           |
| BG1      | 124105-125436 | -      | 549         | 183               | 3    | 546          | 91.99                   | 182                | 87.98                   | 21                       | 0.5591                           |
| BG2      | 131358-133021 | -      | 579         | 192               | 5    | 579          | 86.32                   | 190                | 71.88                   | 52                       | 0.9375                           |
| Blec1    | 135818-137846 | +      | 567         | 188               | 5    | 567          | 92.59                   | 188                | 88.3                    | 22                       | 0.4683                           |
| BGF1     | 138411-139729 | -      | 339         | 112               | 3    | 345          | 83.38                   | 113                | 42.98                   | 62                       | 0.7904                           |
| TAPBP    | 140657-144216 | +      | 1293        | 430               | 8    | 1293         | 92.19                   | 430                | 89.77                   | 44                       | 0.3179                           |
| BFB*     | N/A           | N/A    | 792         | 263               | N/A  | 792          | 92.93                   | 263                | 85.93                   | 37                       | 1.4489                           |
| BRD2     | 150146-156295 | -      | 2976        | 991               | 13   | 3078         | 86.85                   | 776                | 75.28                   | 30                       | 0.0306                           |
| DMA      | 160545-162778 | +      | 789         | 263               | 4    | 789          | 92.65                   | 263                | 89.73                   | 27                       | 0.4528                           |
| DMA1     | 163010-165184 | +      | 930         | 310               | 6    | 930          | 91.29                   | 310                | 86.45                   | 42                       | 0.4978                           |
| DMA2     | 165617-168363 | +      | 768         | 256               | 5    | 768          | 92.71                   | 256                | 92.58                   | 19                       | 0.1622                           |
| BFA      | 169254-170740 | +      | 996         | 331               | 5    | 1001         | 83.66                   | 345                | 64.12                   | 95                       | 0.7116                           |
| TAP2     | 172793-176021 | -      | 2100        | 700               | 9    | 2100         | 92.48                   | 700                | 93.14                   | 48                       | 0.1675                           |
| TAP1     | 176574-180981 | +      | 1752        | 584               | 11   | 1739         | 93.21                   | 580                | 92.81                   | 38                       | 0.2191                           |
| BE2      | 181900-184038 | -      | 1530        | 509               | 6    | 1213         | 62.28                   | 326                | 57.39                   | 119                      | 0.8157                           |
| C51      | 185102-199258 | +      | 5031        | 1676              | 40   | 4998         | 93.33                   | 1665               | 93.2                    | 101                      | 0.1974                           |
| CompA    | 199593-200795 | +      | 396         | 131               | 4    | 396          | 96.72                   | 131                | 99.24                   | 1                        | 0.0324                           |
| CYD1     | 201291-205141 | +      | 1431        | 477               | 11   | 1431         | 92.67                   | 477                | 94.13                   | 28                       | 0.7109                           |
| TNFB     | 209524-215604 | -      | 2472        | 824               | 10   | 2496         | 92.14                   | 832                | 92.34                   | 50                       | 0.2002                           |
| LTPAR1   | 221450-222538 | +      | 1089        | 363               | 1    | 1089         | 94.12                   | 363                | 94.49                   | 20                       | 0.1954                           |
| C5A2     | 223740-225788 | -      | 1044        | 348               | 6    | 1044         | 92.24                   | 348                | 87.93                   | 42                       | 0.3796                           |
| CD1A1    | 227030-229500 | -      | 1122        | 374               | 6    | 1122         | 93.4                    | 374                | 90.64                   | 35                       | 0.3294                           |

KIFC1, kinesin family member C1; Blec, C-type lectin-like receptor; Bzfp, B-locus zinc finger-like protein; TRIM, tripartite motif containing protein; 44G24.1, histone H2B-like protein; IL4I1, interleukin 4 induced 1; HEP21, hen egg protein 21 kDa; GNB2L1, guanine nucleotide binding-like protein; BTN, B-butyrophilin protein; BG1, BG-like antigen; CD1A1/A2, CD1-like proteins

\*  $d_N/d_S$  = ratio of nonsynonymous ( $d_N$ ) to synonymous ( $d_S$ ) substitutions.

† Defined as a pseudogene in chicken.

‡ Not predicted result was identified from the DNA assembly. The transcript sequence was alternatively derived from the transcriptome assembly by RNA-Seq.

5  
6  
7  
8  
9  
10  
11  
12  
13  
14  
15  
16  
17  
18  
19  
20  
21  
22  
23  
24  
25  
26  
27  
28  
29  
30  
31  
32  
33  
34  
35  
36  
37  
38  
39  
40  
41  
42  
43  
44  
45  
46  
47  
48  
49  
50  
51  
52  
53  
54  
55  
56  
57  
58  
59  
60  
61  
62  
63  
64  
65

1000

**A**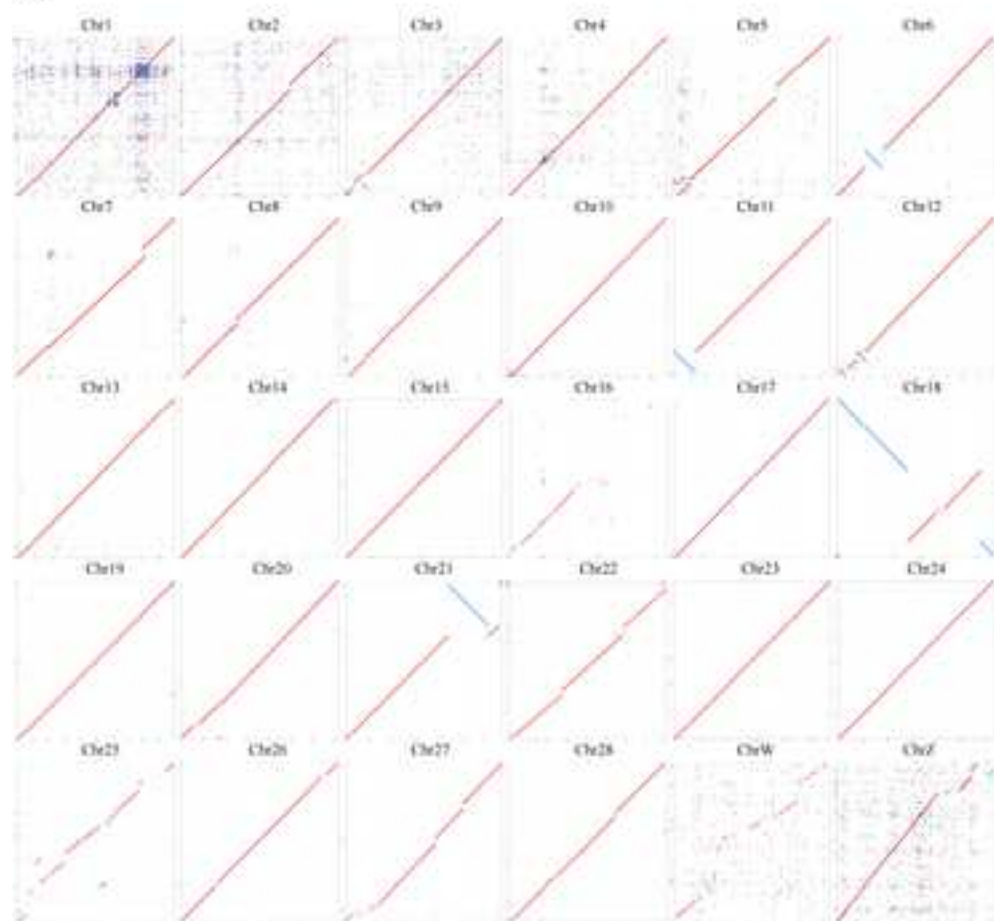**B**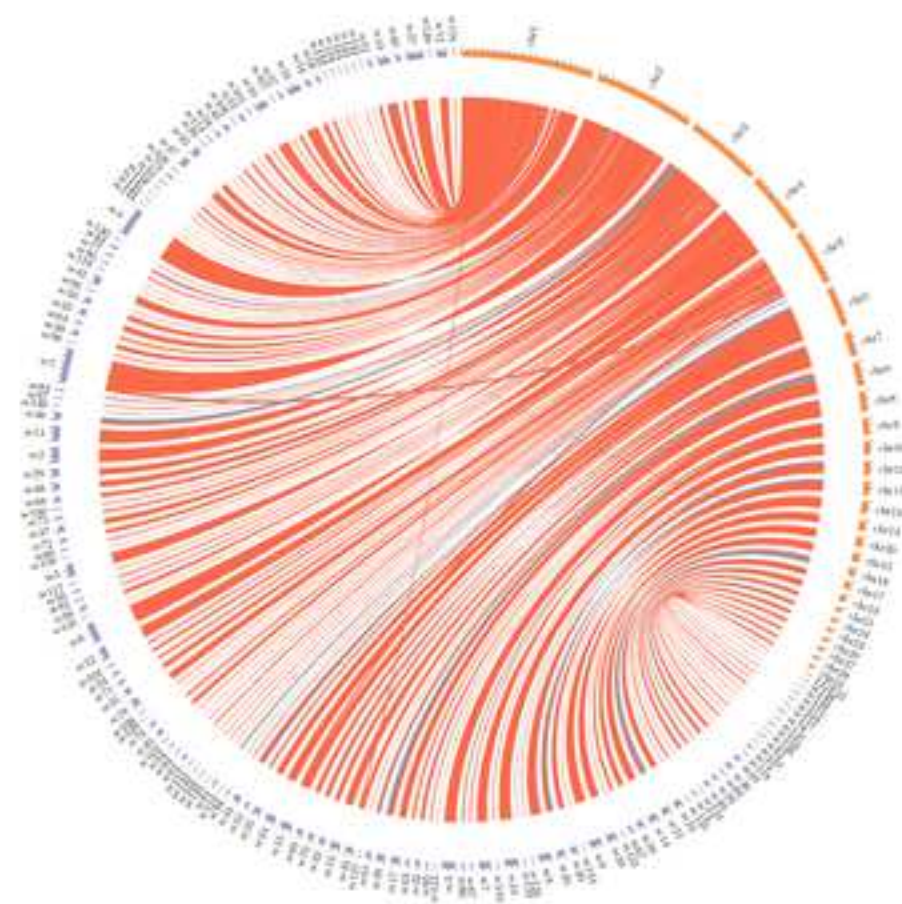

Figure 2

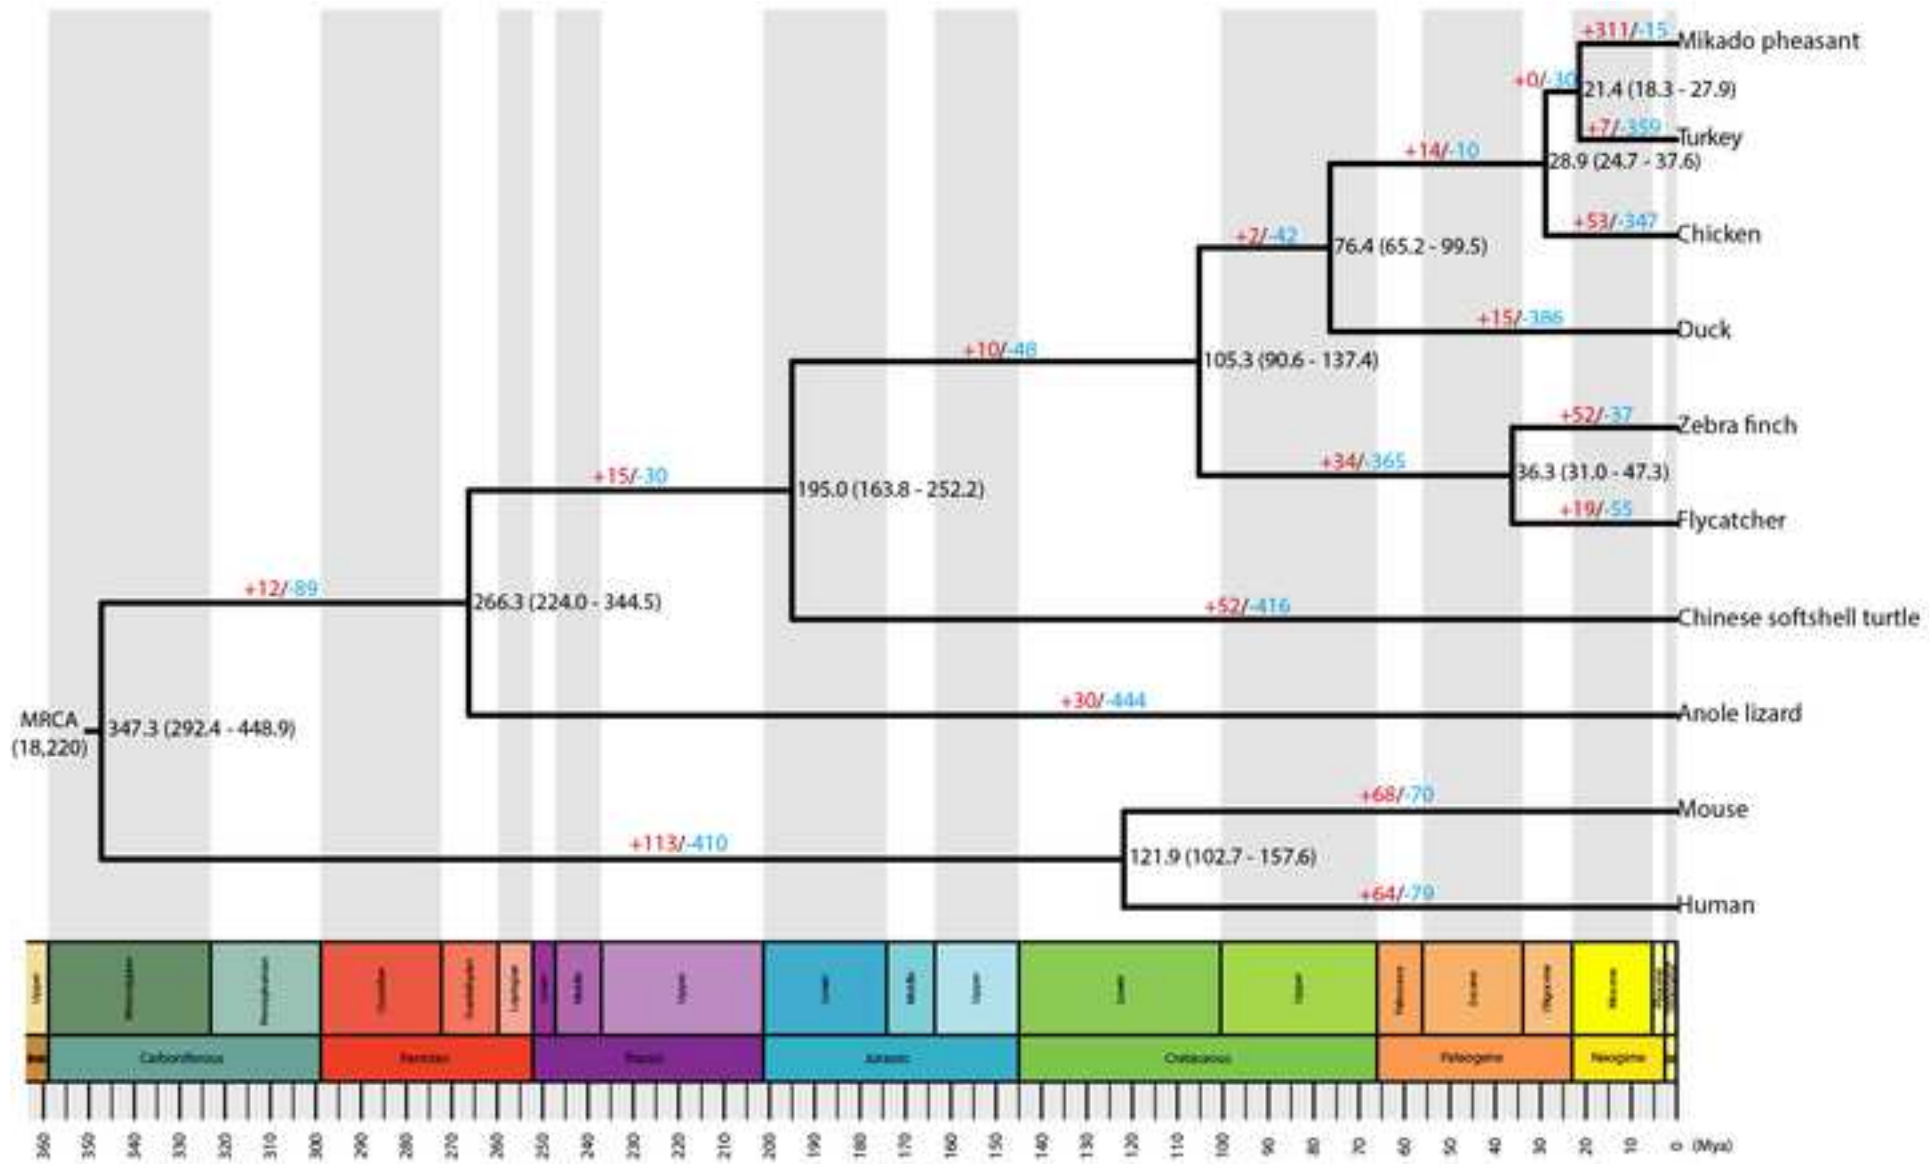

Figure 3

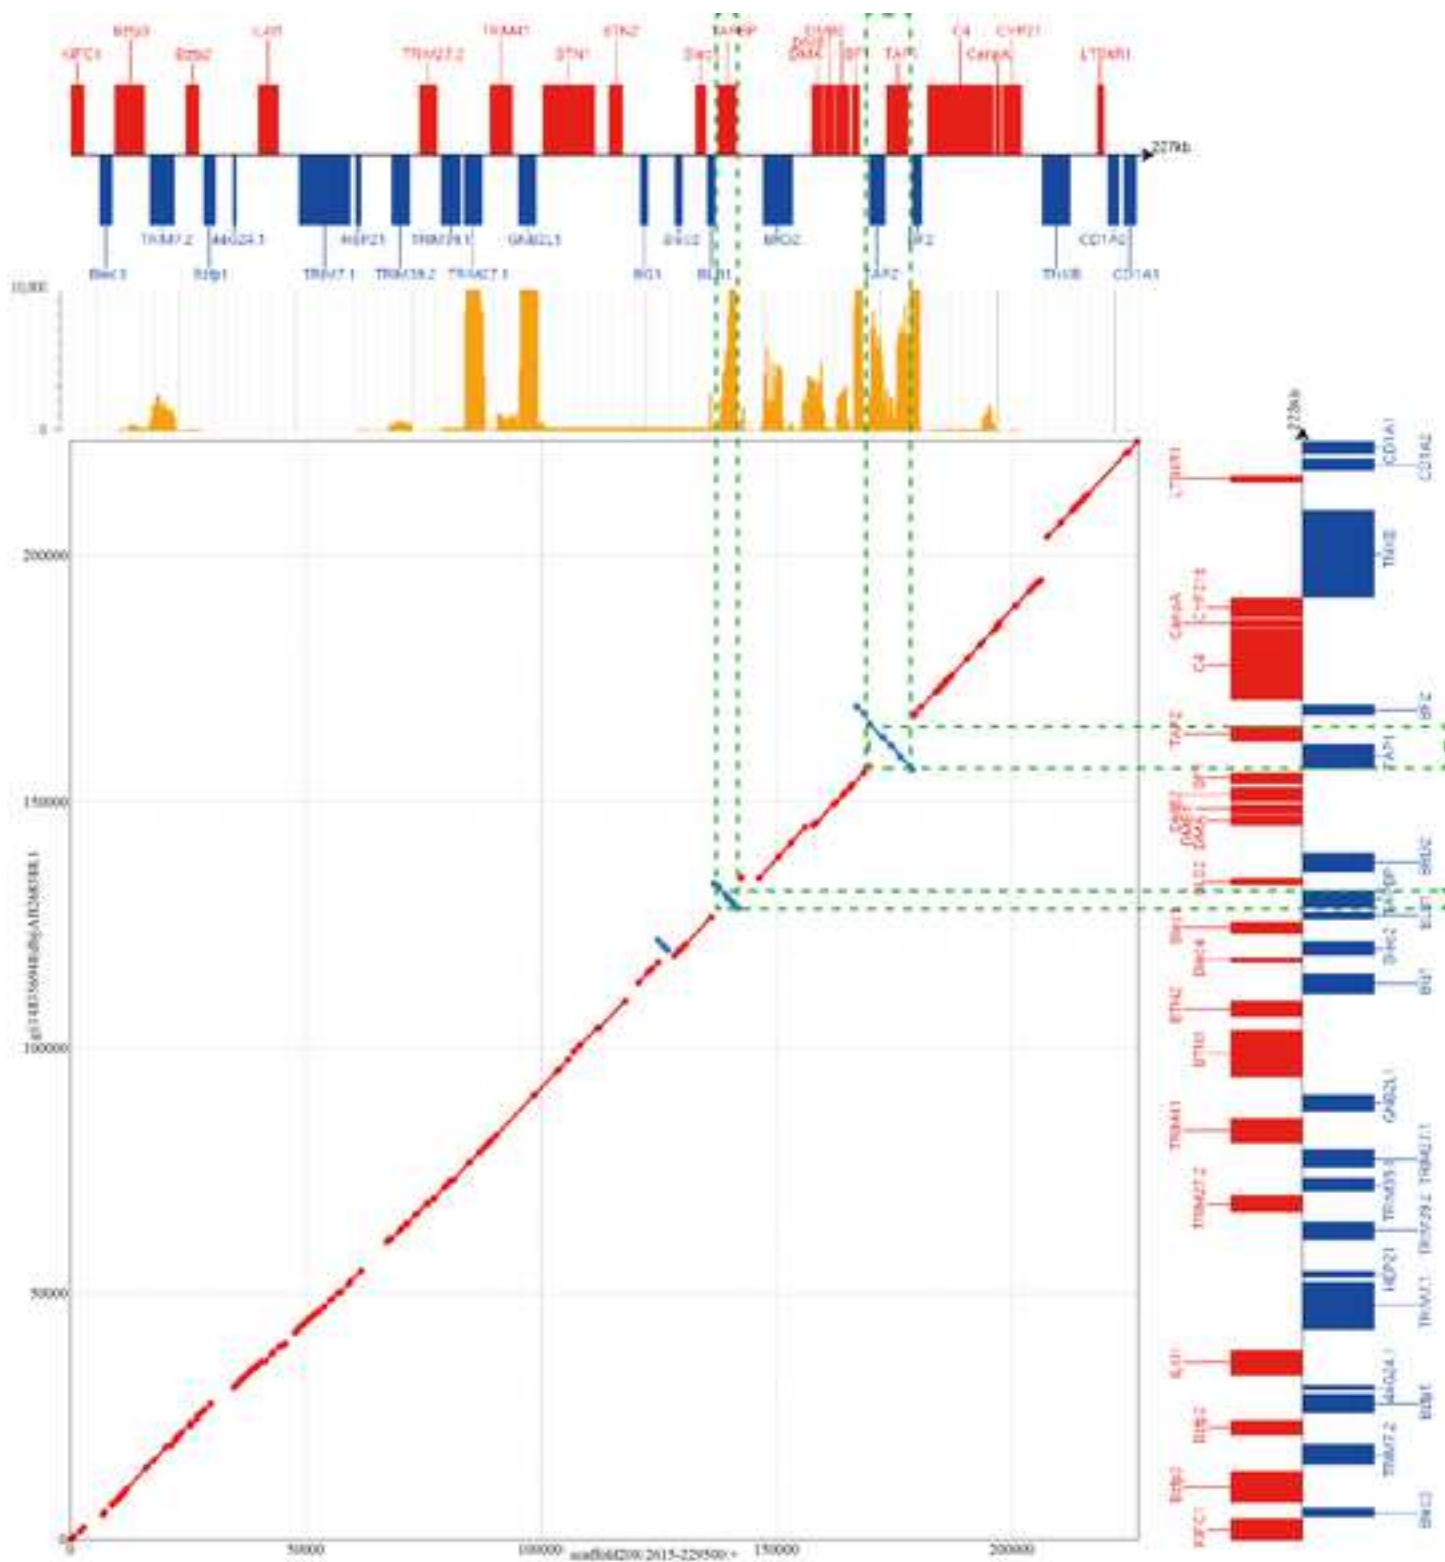

Figure 4

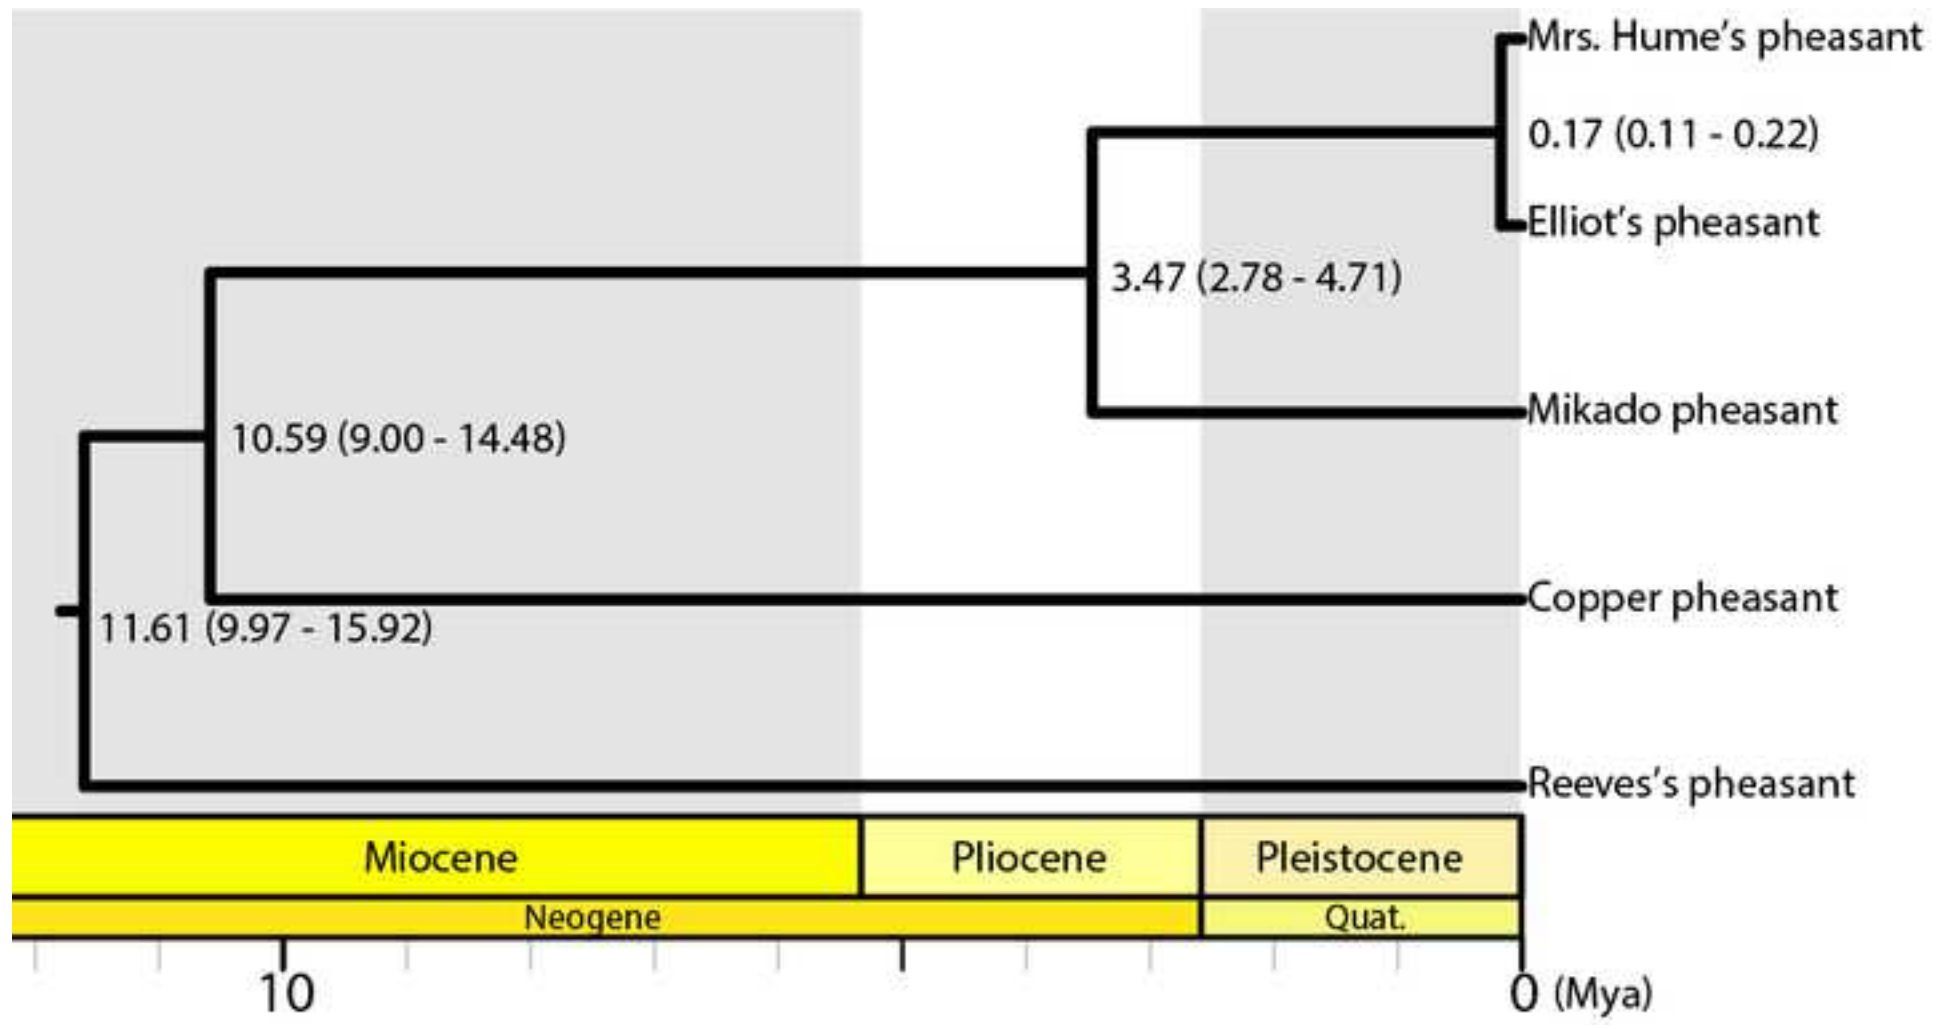

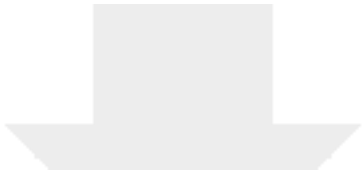

Click here to access/download  
**Supplementary Material**  
Additional file 1.docx





Click here to access/download  
**Supplementary Material**  
Additional file 2.xlsx
