# Supplementary material for: Whole-genome de novo sequencing reveals unique genes that contributed to the adaptive evolution of the Mikado pheasant
Source: PubMed Central journal article supplement (PMC5941149; doi:10.1093/gigascience/giy044), 2018-05-02
Supplement: giy044_reviewer_3_report_(revision_1).pdf [file giy044_reviewer_3_report_%28revision_1%29.pdf]

## Reviewer Report

### Title: Whole-Genome De Novo Sequencing Reveals Unique Genes that Contributed to the Adaptive Evolution of the Mikado Pheasant

Version: Revision 1 Date: 3/13/2018

Reviewer name: LÉL EÖRY

#### Reviewer Comments to Author:

In their response to the reviewers' comments the authors clarified all the major and minor issues raised with their manuscript.

I appreciate the effort taken to compare the MCH-B region between the the Mikado pheasant and the gal5 assembly and the results which validate the conclusions made in the MS.

I consider the changes made by the authors to be appropriate and I suggest the publication of the paper in its revised form.

#### Methods

Are the methods appropriate to the aims of the study, are they well described, and are necessary controls included? Yes

#### Conclusions

Are the conclusions adequately supported by the data shown? Yes

#### Reporting Standards

Does the manuscript adhere to the journal's guidelines on [minimum standards of reporting?](#) Yes

Choose an item.

#### Statistics

Are you able to assess all statistics in the manuscript, including the appropriateness of statistical tests used? Yes, and I have assessed the statistics in my report.

#### Quality of Written English

Please indicate the quality of language in the manuscript: Acceptable

#### Declaration of Competing Interests

Please complete a declaration of competing interests, considering the following questions:

- Have you in the past five years received reimbursements, fees, funding, or salary from an organisation that may in any way gain or lose financially from the publication of this manuscript, either now or in the future?
- Do you hold any stocks or shares in an organisation that may in any way gain or lose financially from the publication of this manuscript, either now or in the future?
- Do you hold or are you currently applying for any patents relating to the content of the manuscript?
- Have you received reimbursements, fees, funding, or salary from an organization that holds or has applied for patents relating to the content of the manuscript?
- Do you have any other financial competing interests?
- Do you have any non-financial competing interests in relation to this paper?

If you can answer no to all of the above, write 'I declare that I have no competing interests' below. If your reply is yes to any, please give details below.

I declare that I have no competing interests'

I agree to the open peer review policy of the journal. I understand that my name will be included on my report to the authors and, if the manuscript is accepted for publication, my named report including any attachments I upload will be posted on the website along with the authors' responses. I agree for my report to be made available under an Open Access Creative Commons CC-BY license (<http://creativecommons.org/licenses/by/4.0/>). I understand that any comments which I do not wish to be included in my named report can be included as confidential comments to the editors, which will not be published.

I agree to the open peer review policy of the journal

To further support our reviewers, we have joined with Publons, where you can gain additional credit to further highlight your hard work (see: <https://publons.com/journal/530/gigascience>). On publication of this paper, your review will be automatically added to Publons, you can then choose whether or not to claim your Publons credit. I understand this statement.

Yes Choose an item.
